# Supplementary material for: The MarR-Type Regulator MalR Is Involved in Stress-Responsive Cell Envelope Remodeling in Corynebacterium glutamicum
Source: PubMed Central journal article supplement (PMC6536590; doi:10.3389/fmicb.2019.01039), 2019-05-21
Supplement: Data_Sheet_1.pdf [file Data_Sheet_1.pdf]

## *Supplementary Material*

### 1 Supplementary Data

### 2 Supplementary Figures and Tables

#### 2.1 Supplementary Figures

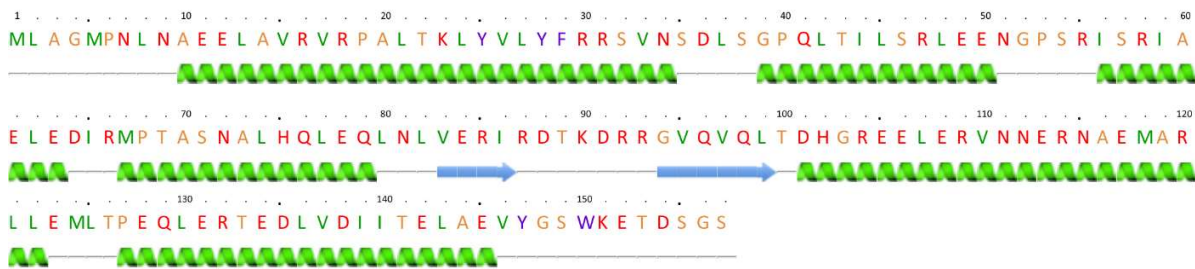

**Figure S1: Prediction of the secondary structure of MalR.** Using the online tool Phyre<sup>2</sup>, the secondary structure of MalR was predicted with 99.9% confidence of 92 % of residues (Kelly L.A., Mezulis S., Yates C., Wass M., Sternberg, M. 2015. Nat. Protoc.10:845–858.).

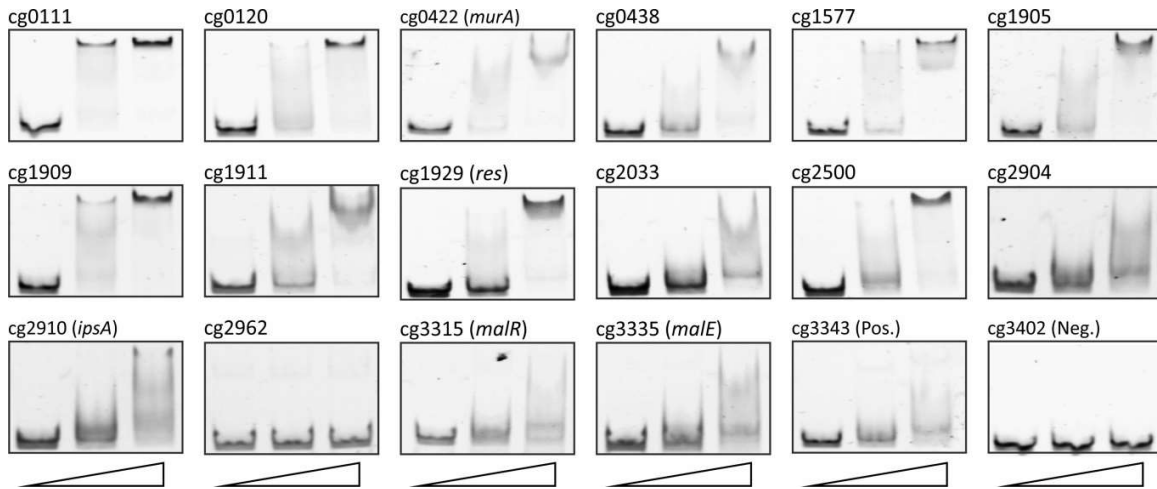

**Figure S2: *In vitro* DNA-binding of purified MalR protein.** Electrophoretic mobility shift assays (EMSAs) were performed to verify binding of MalR to promoter regions identified via ChAP-Seq. Therefore, MalR was purified with a C-terminal Strep-tag fusion. At total, 90 ng of 100 bp DNA fragments (50 bp up- and downstream the peak maximum) were incubated without protein (first lane), with 3 molar excess (228 nM, second lane) and 10 molar excess of purified MalR (760 nM, third lane) for 30 min in bandshift-buffer (50 mM Tris-HCl, 5 mM MgCl<sub>2</sub>, 40 mM KCl, 5 % (v/v) glycerol, pH 7.5). Subsequently, samples were separated on a 10% native polyacrylamide gel electrophoresis and gels were stained using SYBR Green I Nucleic Acid Gel Stain (Lonza, Rockland, ME, USA).

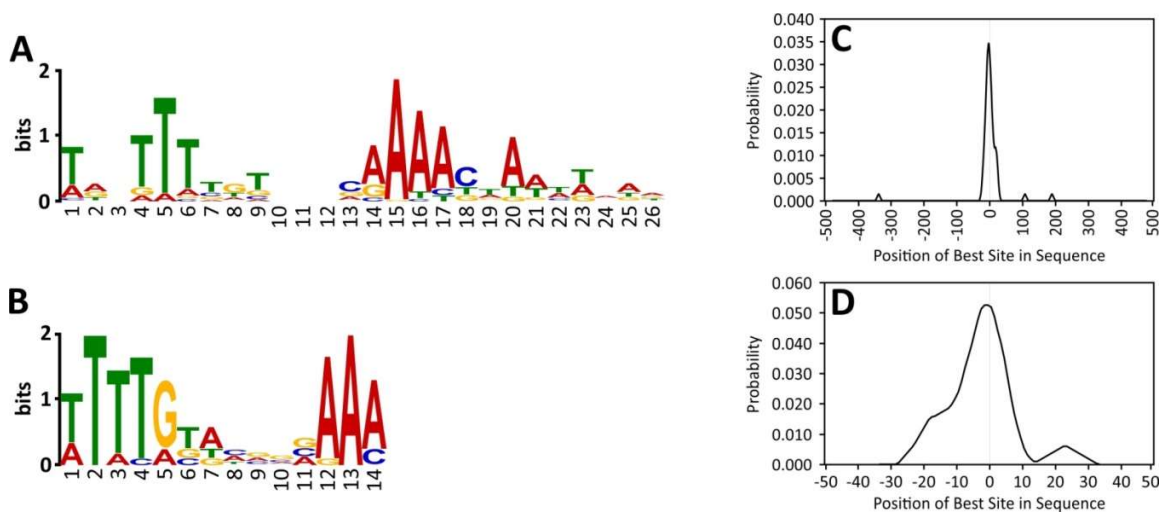

**Figure S3: Deduction of a DNA binding motif of MalR** The online tool MEME-ChIP (Ma W, Noble WS, Bailey TL. 2014. Nat Protoc 9:1428–1450.) was used to predict MalR binding sites on the basis of all targets sequences (each sequence 1000 bp) identified via ChAP-Seq analysis (A) and based on the 16 MalR targets (100 bp each) verified using EMSAs (B). (C, D) The distribution of the predicted binding sites throughout the single uploaded DNA sequences was determined using CentriMo (Bailey TL, MacHanick P. 2012. Nucleic Acids Res 40:e128.).

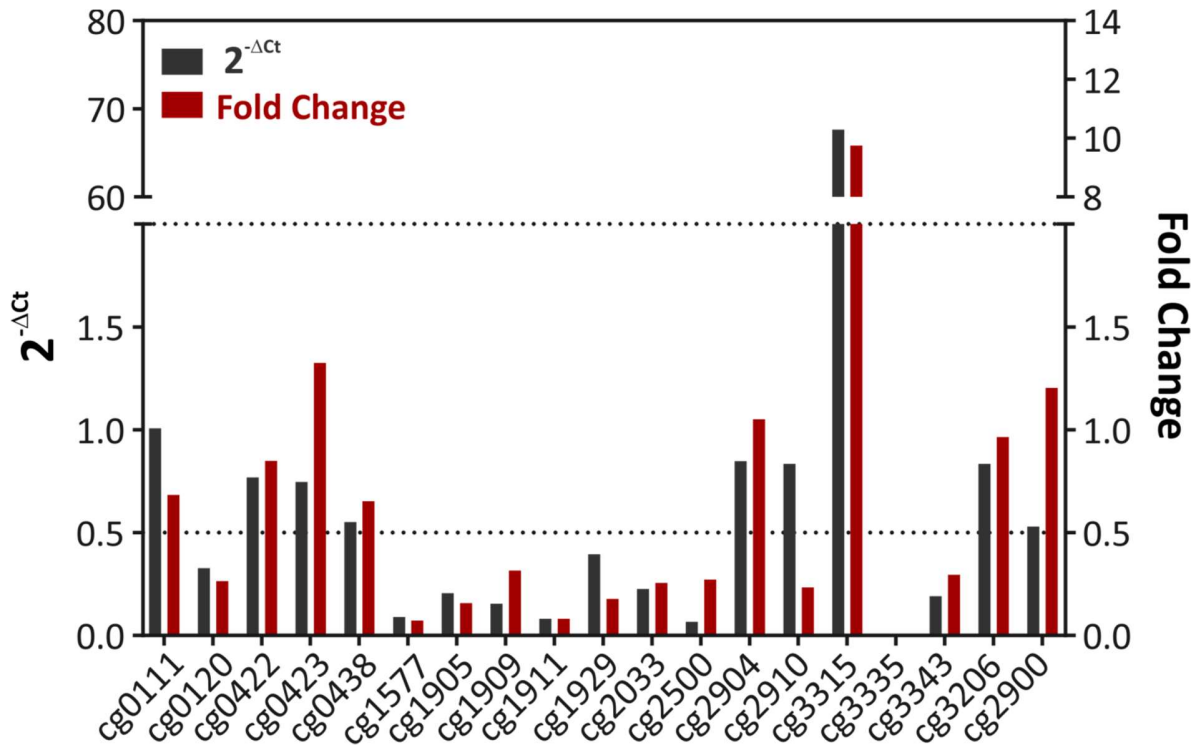

**Figure S4: Verification of DNA-microarray data using qRT-PCR.** Microarray data were verified with qRT-PCRs (oligonucleotides are listed in Table S3 D). The dark-grey bars represent the relative transcriptional change based on the qRT-PCR data and the red bars show the average fold-change obtained from DNA microarray experiments. The values below 0.5 are classified as “downregulated”, the values above 2 are classified as “upregulated”. In the case of cg3335, the bars are not visible because of very low values (qRT-PCR: 0.018, DNA-microarray: 0.007).

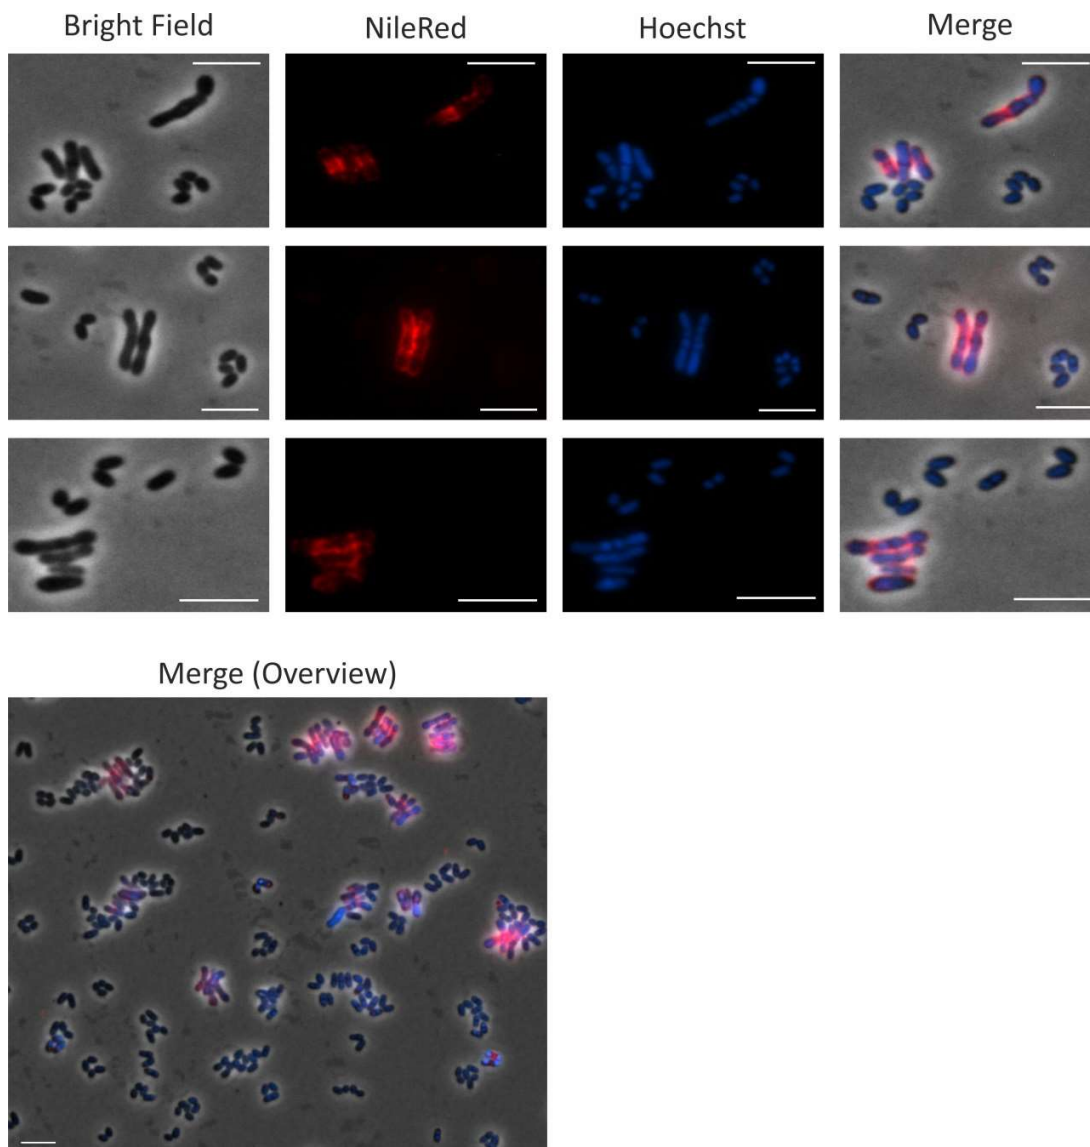

**Figure S5: MalR overproduction causes severe growth defects of *C. glutamicum*.** For microscopic analysis, cells were grown in CGXII medium for 24 h at 30°C. Shown are *C. glutamicum* ATCC 13032 cells carrying the over expression vector pEKEx2-*malR*. The expression of *malR* is induced by the addition of 100  $\mu$ M IPTG. Lipid components of the cell membrane were stained with Nile Red (red); DNA was stained with Hoechst 33342 (blue). The white scale bars represent 5  $\mu$ m. In addition to chosen examples of elongated cells an overview is shown to present the distribution of elongated cells inside the samples.

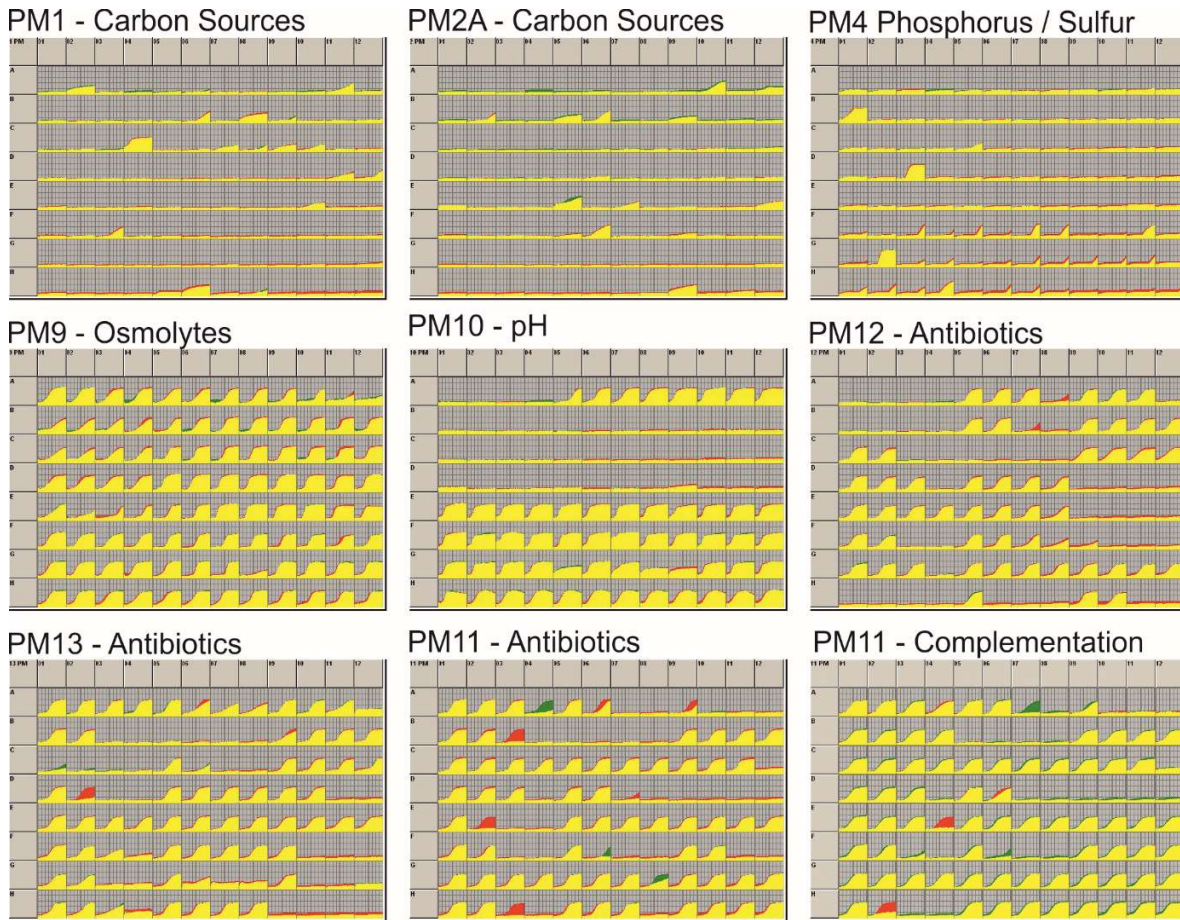

**Figure S6: Overview of all tested PM plates for a comparison of *C. glutamicum*  $\Delta malR$  and *C. glutamicum* wild type.** An OmniLog System from Biolog (Hayward CA, USA) was used to perform phenotypic microarrays with wild type *C. glutamicum* ATCC 13032 as well as the *malR* deletion strain. The experiments (PM1, PM2A, PM4, PM9, PM10, PM11, PM12, PM13) were conducted like described in the protocol of the manufacturer (Bochner BR, Gadzinski P, Panomitros E. 2001. Genome Res 11:1246–1255.). The wild type strain is displayed in red, whereas the *malR* deficient mutant is green. Yellow means a similar behavior. PM11 was repeated (“PM11 – Complementation”) using the *malR* deficient strain with an empty vector (pEKEx2, green) as well as the *malR* deficient strain carrying the vector pEKEx2-*malR* for complementation studies. The expression of *malR* was induced by the addition of 5  $\mu$ M IPTG.

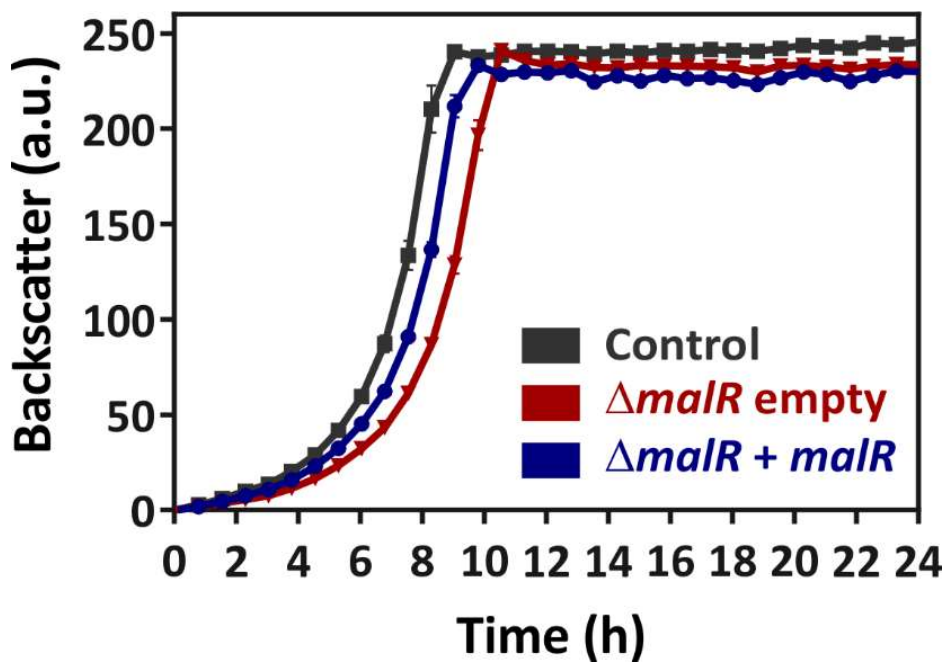

**Figure S7: Comparison of the growth of the *C. glutamicum* strains used for the complementation of phenotypes analysed via phenotypic microarrays.** To complement the effects of the *malR* deletion, *C. glutamicum* ATCC 13032 wild type cells with the empty vector pEKEx2 (Control) were cultivated in comparison with a strain lacking the *malR* gene either with the empty vector pEKEx2 or with the *malR* encoding vector. The production of MalR was induced using 5  $\mu$ M IPTG. Remarkably, strain  $\Delta malR$  shows a reduced growth rate under these conditions. This phenotype was successfully complemented by the introduction of plasmid-encoded *malR*. Overall, this finding suggested a slightly increased sensitivity of strain  $\Delta malR$  towards the antibiotic kanamycin.

## 2.2 Supplementary Tables

Table S3 A: Oligonucleotides used in this study

| Number | Sequence (5'-3')                                        |
|--------|---------------------------------------------------------|
| 1      | AGGTCGACTCTAGAGGATCCTCGAACGGAAATTACTTGGCAATAC           |
| 2      | CTTCTCGAACTGTGGGTGGGACCAGCTAGCAGAACCGCTGTCGGTCT         |
| 3      | GCTAGCTGGTCCCACCCACAGTTCGAGAAGTAACAGTTTTCTCCATCTCAACTCC |
| 4      | AAACGACGGCCAGTGAATTCACAAGTCCTAGTGGGACGG                 |
| 5      | AGGTCGACTCTAGAGGATCCCCGTCCATTCTTTACCAACTGT              |
| 6      | CCCATCCACTAAACTTAAACAAGCGGTATTGCCAAGTAATTTCC            |
| 7      | TGTTTAAGTTTAGTGGATGGGCAGTTTTCTCCATCTCAACTCCG            |
| 8      | AAACGACGGCCAGTGAATTCGGCACAAGTCCTAGTGGGAC                |
| 9      | TTTAAGAAGGAGATATACATATGCTGGCAGGCATGC                    |
| 10     | AAATACAGTTTCTCGCTAGCAGAACCGCTGTCGGTCTC                  |
| 11     | AAGCTTGCATGCCTGCAGAAGGAGGAGTCGTATGCCTAATTTAAACGCTGAGGAG |
| 12     | AAACGACGGCCAGTGAATTCTTAAGAACCGCTGTCGGTCTC               |
| 13     | GCCAAGGTAAGTTGTACTTTTTCTG                               |
| 14     | GTAGTTGACGCGGGTGAC                                      |
| 15     | TAACAATCCCAACTCGAAGCAC                                  |
| 16     | TGACAATCCTCTCCACGAAGC                                   |
| 17     | GAGTGTGAGAAACATGGGACGTG                                 |
| 18     | ACAGGTTACCAGCCAAAGTG                                    |
| 19     | TCGATACCCAGAAAGAATTGCATTG                               |
| 20     | ATCTCCCTGGATAGTGATCTTGC                                 |
| 21     | CCGTCCAGAACTAGGACTATTTG                                 |
| 22     | TAATCCCAACAATCGCTTATGACG                                |



23 TTGAAATCGTGATCGCCTGTTATTG  
24 AGCCATGTTTGCTTCTCCTTTTC  
25 TCAGGTTTACTACCGACTGTAGTAG  
26 TTTGAAAGTAGAAATTACTGGTAGTGGATTA  
27 TTTACCTTCCTCTACCTAATCTCCC  
28 ATCTCAGTAGCGTTGCCTCC  
29 TTTCTCATTTGCCACCCCC  
30 CTAAGATGAGTATTTAAGCCCTGTTTAT  
31 ACGCCCGTATCGTTTCGC  
32 ATGTACTIONGTTTAAAACAATAGTTGTCAATG  
33 GCACCCATGGTTAGCGTACT  
34 TTCTACCGGGGGTAGTAGCG  
35 TGTTGCTTCCGCTGACC  
36 ACCTTCTATATAAACCTTTTATGAGGGGAAATG  
37 CTGGACCGAGCTCAATGC  
38 TGAAAAATTGTTTTAATATGCAACACAACATA  
39 TTGTAGGCGTTGGACACTG  
40 AGATTGAAATGATTATGGGTAGGAAAC  
41 AAGAGCCGTGATGTTAACAAATG  
42 TAGTTAGGTTACACTAATGGTGTCC  
43 GGAACAGCACAGAATTAAGGC  
44 GAAAAAGCAATAATTTGGACAGAAAAAG  
45 AAACCACCCCTGTACAAAATTAGC  
46 AAAAACACTAGCTAAATCTGTAGCTCAAC  
47 ATGTTTCTTACTTTAAGCGCAGTTAATTG

48 GGATTTAAATTTTGTATTGGAAAGCTAATAATT  
49 CATAGGGGTATAGCCTTGAG  
50 CAGTGTGCGCAGGTCATGCC  
51 GTATGGGTTGAGATTCCGACAG  
52 TCTTCCCTATCACCTCCAGTT  
53 GGAGCTTTCGCTGACTATCTT  
54 AATTCTCCTGCGTCGTCTTT  
55 GACGTGGATCGTGTATGGAATTA  
56 CAGCCTTCTCAAGGTGGATAAA  
57 ACTGTGGATCGACATTCCTTTC  
58 CCGCGTCTAAGTCCCTTTAATC  
59 ATGACTCGATCCCAGGACTAT  
60 TGAATGCGGTATGAGCTAAGG  
61 GCCCAAACACCACCGATATT  
62 CATCAGTCAAGCAGGTCTGAAC  
63 CATCTTCCATCCACAGACCTAAT  
64 GAAGTCGGACACGATGTAGAAG  
65 ATCTCGTGCTTGCTGTGATTA  
66 CTGGGTGAATCCTAAAGACCTG  
67 CTGATGGGTCAGTCGTAGTTTC  
68 CCGAATAGAGCCAGGAACAAT  
69 CTCGACAACGTGAAGCTGTTA  
70 CAAGCCAGGTCTGTGTGATT  
71 GCTGTAGGTAAGGGCTTTGATA  
72 TAGCCAACAGCCTGGTAATC

73 GAGCTTCAGAACTTGCAACAG  
74 CATTGAGGGCGAGGATGATT  
75 AGCGAAAGTTCCCGAATCTG  
76 CGGACGGTCAGTCTTGTTATG  
77 CTCGACACCGCTGAAGATATG  
78 CAGTAAGCAGCACTCCGATT  
79 GGGTCCACAGCTCACTATTT  
80 AGCGGTTGGCATAACGAATA  
81 AGCAATCAAGGAAGATCCAGAG  
82 GATATCGCCAAGGCCAAGAA  
83 CCGGTTCTTCTGCATCTTCT  
84 GGTTACATCGTCGAAGTCCTTA  
85 CAGACTCACAACAACGTCAAAC  
86 CTAGTTCGTGGCCAACTTCA  
87 TTCCTCACAGATCGCTTTCG  
88 GAGCAGGTATGGAGCAACTT

---

**Table S3 B: Construction of plasmids used in this study.** Numbers represent oligonucleotide pairs used for PCR (see Table S3 A). The restriction enzymes were used for linearization of the vectors and plasmids were assembled using Gibson assembly. Sequencing for verification of the chromosomal modifications was conducted using primers 13 + 14.

| <b>Plasmid</b>                       | <b>Template</b>                 | <b>Primers</b> | <b>Vector</b>       | <b>Restriction Enzymes</b> |
|--------------------------------------|---------------------------------|----------------|---------------------|----------------------------|
| pEKEx2- <i>malR</i>                  | <i>C. glutamicum</i> chromosome | 11 + 12        | pEKEx2              | *PstI *EcoRI               |
| pK19- <i>malR</i> -C- <i>strep</i>   | <i>C. glutamicum</i> chromosome | 1 + 2; 3 + 4   | pK19 <i>mobsacB</i> | *BamHI *EcoRI              |
| pK19- $\Delta$ <i>malR</i>           | <i>C. glutamicum</i> chromosome | 5 + 6; 7 + 8   | pK19 <i>mobsacB</i> | *BamHI *EcoRI              |
| pET24b- <i>malR</i> -C- <i>strep</i> | <i>C. glutamicum</i> chromosome | 9 + 10         | pET24b              | *NheI *NdeI                |

**Table S3 C: Amplification of EMSAs DNA probes.** Indicated are the oligonucleotide pairs used for PCR amplification of the 100 bp fragments. The fragments cover the maximum peak position determined by ChAP-Seq and lay inside the promoter regions of each gene.

| Fragment | Gene                      | Oligonucleotides (Table S1) |
|----------|---------------------------|-----------------------------|
| 1        | cg0111                    | 15 + 16                     |
| 2        | cg0120                    | 17 + 18                     |
| 3        | cg0423                    | 19 + 20                     |
| 4        | cg0438                    | 21 + 22                     |
| 5        | cg1577                    | 23 + 24                     |
| 6        | cg1905                    | 25 + 26                     |
| 7        | cg1909                    | 27 + 28                     |
| 8        | cg1911                    | 29 + 30                     |
| 9        | cg1929                    | 31 + 32                     |
| 10       | cg2033                    | 33 + 34                     |
| 11       | cg2500                    | 35 + 36                     |
| 12       | cg2904                    | 37 + 38                     |
| 13       | cg2910                    | 39 + 40                     |
| 14       | cg2962                    | 41 + 42                     |
| 15       | cg3315                    | 43 + 44                     |
| 16       | cg3335                    | 45 + 46                     |
| 17       | cg3343 (positive control) | 47 + 48                     |
| 18       | cg3402 (negative control) | 49 + 50                     |

**Table S3 D: Oligonucleotide combinations for qRT-PCR analysis to verify microarray data.**

Indicated are the oligonucleotide pairs used for qRT-PCR. Each pair comprises approximately 100 bp fragments and shares similar features regarding GC-content and melting temperature.

| Fragment | Gene   | Oligonucleotides (Table S1) |
|----------|--------|-----------------------------|
| 1        | cg0111 | 51 + 52                     |
| 2        | cg0120 | 53 + 54                     |
| 3        | cg0422 | 55 + 56                     |
| 4        | cg0423 | 57 + 58                     |
| 5        | cg0438 | 59 + 60                     |
| 6        | cg1577 | 61 + 62                     |
| 7        | cg1905 | 63 + 64                     |
| 8        | cg1909 | 65 + 66                     |
| 9        | cg1911 | 67 + 68                     |
| 10       | cg1929 | 69 + 70                     |
| 11       | cg2033 | 71 + 72                     |
| 12       | cg2500 | 73 + 74                     |
| 13       | cg2904 | 75 + 76                     |
| 14       | cg2910 | 77 + 78                     |
| 15       | cg3315 | 79 + 80                     |
| 16       | cg3335 | 81 + 82                     |
| 17       | cg3343 | 83 + 84                     |
| 18       | cg3206 | 85 + 86                     |
| 19       | cg2900 | 87 + 88                     |

**Table S4: Antibiotics affecting the growth of wild type cells or  $\Delta malR$  cells in phenotypic microarrays (BioLog).** For evaluation of the sensitivity of the wild type ATCC 13032 or the *malR* deletion mutant, the BioLog plates PM11, PM12 PM13 were used. The table shows antibiotics were both strains showed differences in the metabolic activity (see Figure 6 and Figure S6).

| <b>Antibiotic</b>       | <b>Better Growth</b>            | <b>Substance class</b>           |
|-------------------------|---------------------------------|----------------------------------|
| <b>Gentamicin</b>       | <i><math>\Delta malR</math></i> | Aminoglycoside                   |
| <b>Amikacin</b>         | <i><math>\Delta malR</math></i> | Aminoglycoside                   |
| <b>Lincomycin</b>       | wt                              | Lincosamide                      |
| <b>Erythromycin</b>     | <i><math>\Delta malR</math></i> | Glycoside                        |
| <b>Chlortetracyclin</b> | wt                              | Tetracycline                     |
| <b>Demeclocycline</b>   | wt                              | Tetracycline                     |
| <b>Tetracyclin</b>      | wt                              | Tetracycline                     |
| <b>Penimepicyclin</b>   | wt                              | Tetracycline                     |
| <b>Cefazolin</b>        | wt                              | $\beta$ -Lactame; Cephalosporine |
| <b>Cephalothin</b>      | wt                              | $\beta$ -Lactame; Cephalosporine |
| <b>Cefuroxime</b>       | wt                              | $\beta$ -Lactame; Cephalosporine |
| <b>Amoxicillin</b>      | wt                              | $\beta$ -Lactame; Penicilline    |
