# Supplementary material for: The MarR-Type Regulator MalR Is Involved in Stress-Responsive Cell Envelope Remodeling in Corynebacterium glutamicum
Source: Front Microbiol. 2019 May 21;10:1039. doi: 10.3389/fmicb.2019.01039 (PMC6536590; doi:10.3389/fmicb.2019.01039)
Supplement: Supplementary file 3 [file Table_2.XLSX]

## Sheet: Table S2
Table S2: Transcriptomic changes triggered by an overexpression or an deletion of malR. Shown is the average fold change of triplicates with the corresponding p-value.
Marked in red are the downregulated genes (<0.5) and marked in green the upregulated genes (>2). The CGP3 prophage region is shaded in blue. P-values worse than 0.05 are highlighted in red. If no p-value is given, only one replicate was analyzed.
Gene Locus	Gene Name	Annotation	Average Fold Change (OE)	P-value (OE)	Average Fold Change (Δ)	P-value (Δ)	Functional Category
cg0001	dnaA	chromosomal replication initiation protein	0.661687	0.0678073	0.781923	0.128713	DNA replication, recombination, repair, and degradation
cg0002		hypothetical protein	/	/	0.920389	0.304076	Unknown function
cg0004	dnaN	DNA polymerase III subunit β (EC:2.7.7.7)	1.60003	0.127271	1.08696	0.18877	DNA replication, recombination, repair, and degradation
cg0005	recF	recombination protein RecF	1.57191	0.0256091	0.905706	0.196717	DNA replication, recombination, repair, and degradation
cg0006		hypothetical protein, conserved	1.00945	0.440183	0.806776	0.322637	Unknown function
cg0007	gyrB	DNA topoisomerase/gyrase IV, subunit B (EC:5.99.1.3)	1.04028	0.185831	0.904349	0.179736	DNA replication, recombination, repair, and degradation
cg0008		putative esterase/lipase	2.01749	0.0720191	1.0361	0.222258	General function prediction only
cg0009		putative membrane protein	0.317281	0.0312159	0.965774	0.432123	Unknown function
cg0010		hypothetical protein, conserved	0.637521	0.00154562	0.723972	0.104207	Unknown function
cg0012	ssuR	sulphonate sulphur utilization transcriptional regulator SsuR, activator of sulfonateester utilization, ROK-family, loss causes inability to utilize alkylsulfonates	6.18854	0.00339734	1.01149	0.288658	Signal transduction mechanisms
cg0013		putative transcriptional regulator, TetR-family	0.564034	0.0709643	0.827011	0.231836	Signal transduction mechanisms
cg0014		putative helix-turn-helix protein, CopG-family	1.35284	0.294783	0.869382	0.21566	Signal transduction mechanisms
cg0015	gyrA	gyrA, DNA gyrase subunit A (EC:5.99.1.3)	1.10095	0.369384	0.961065	0.340866	DNA replication, recombination, repair, and degradation
cg0016		putative integral membrane protein	1.41091	0.129619	1.20866	0.135268	Unknown function
cg0018		putative membrane protein, conserved	9.69952	0.00324834	0.883774	0.437908	Unknown function
cg0019		putative transcriptional regulator, LysR-family	3.15303	0.101434	1.10359	0.0218052	Signal transduction mechanisms
cg0021		hypothetical protein	5.28122	0.112855	0.886159	0.275266	Unknown function
cg0025	ccdA2	putative integral membrane cytochrome biogenesis protein	0.67383	0.0558195	0.89688	0.0925419	Protein turnover and chaperones
cg0026		putative HCCA/protein isomerase, secreted protein, involved in cytochrome c maturation	1.0234	0.395984	0.838888	0.133353	Protein turnover and chaperones
cg0027		putative transcriptional regulator, MarR-family	1.54203	0.0542712	0.847808	0.139083	Signal transduction mechanisms
cg0029		putative protease with chaperone function	1.40531	0.360051	0.892518	0.222385	General function prediction only
cg0031		putative reductase, related to diketogulonate reductase	0.808214	0.309519	0.904422	0.262082	General function prediction only
cg0033		putative secreted protein	2.85325	0.0909983	0.906997	0.273579	Unknown function
cg0034		putative 5-nucleotidase, putative pseudogene	1.19224	0.188825	0.835642	0.00297719	General function prediction only
cg0035		putative 5-nucleotidase, putative pseudogene	1.09619	3.62883e-102	1.03364	8.24268e-226	General function prediction only
cg0038	ohr	putative organic hydroperoxide resistance/detoxification protein	0.653464	8.88178e-16	0.559119	0.103073	General function prediction only
cg0039		putative transcriptional regulator	1.03555	0.442324	1.07956	0.257078	Signal transduction mechanisms
cg0040		putative secreted protein, involved in zinc metabolism	1.21709	0.129754	1.09072	0.0307618	Inorganic ion transport, metabolism, and storage
cg0041	znuA2	ABC-type Mn/Zn import system Znu2, substrate-binding lipoprotein	/	/	1.02173	6.12187e-129	Inorganic ion transport, metabolism, and storage
cg0042	znuB2	ABC-type Mn/Zn import system Znu2, permease component	/	/	1.06139	0.398586	Inorganic ion transport, metabolism, and storage
cg0044	rbsB	putative periplasmic D-ribose-binding protein	1.26521	0.0791937	1.05856	0.118395	Carbon source transport and metabolism
cg0045		putative ABC transport protein, sugar transport, membrane component	1.16746	0.0907351	1.15	0.0422743	Carbon source transport and metabolism
cg0046		putative ABC transport protein, ATP-binding component	2.40581	0.196245	1.02559	0.350524	Carbon source transport and metabolism
cg0047		hypothetical protein, conserved	1.80393	0.0256695	1.14443	0.0469228	Unknown function
cg0048	ppiA	peptidyl-prolyl cis-trans isomerase, cytosolic (EC:5.2.1.8)	2.08269	0.0767329	0.950833	0.366384	Protein turnover and chaperones
cg0049		putative transmembrane protein, rhomboid-family	2.29877	0.187729	1.00482	0.428051	General function prediction only
cg0052		putative iron-siderophore ABC transporter, permease protein	17.1123		1.22179	0.101614	Inorganic ion transport, metabolism, and storage
cg0053		putative iron-siderophore ABC transporter, ATP-binding protein	2.9226	0.0764613	1.14119	0.0650722	Inorganic ion transport, metabolism, and storage
cg0054		putative iron-chelator utilization protein	/	/	1.4199	0.141297	Inorganic ion transport, metabolism, and storage
cg0055	crgA	putative cell division membrane protein, ortholog of Rv0011c, member of the cell division complex in Mycobacteria	1.33449	0.00143155	0.914722	0.132153	Cell division, chromosome partitioning
cg0057	pknB	Eukaryotic-type serine/threonine kinase (EC:2.7.11.1), growth defect in combination with Δcg2388	2.20984	0.0500335	0.886709	0.0610796	Post-translational modification; Signal transduction mechanisms
cg0059	pknA	serine/threonine protein kinase (EC:2.7.11.1), growth defect in combination with Δcg2388	1.39377	0.0563362	1.00787	0.389411	Post-translational modification; Signal transduction mechanisms
cg0060	pbp2b (pbpA)	D-alanyl-D-alanine carboxypeptidase (EC:3.4.16.4)	1.55801	0.0210347	1.04023	0.195783	Cell wall/membrane/envelope biogenesis
cg0061	rodA	putative FTSW/RODA/SPOVE-family cell cycle protein	1.81853	0.0301274	1.10331	0.0660371	Cell division, chromosome partitioning
cg0062	ppp	protein phosphatase (EC:3.1.3.16)	2.03964	0.00543229	1.0547	0.205379	Post-translational modification; Signal transduction mechanisms
cg0063	fhaB	membrane protein with N-terminal transmembrane helix, FHA domain	1.48236	0.130632	0.950952	0.267456	General function prediction only
cg0064	fhaA	cytoplasmic protein with FHA and DUF domain	1.53016	0.143432	0.859807	0.0362245	General function prediction only
cg0065		putative protein of haem peroxidase superfamily	1.07665	0.356249	0.807649	0.274197	General function prediction only
cg0066		hypothetical protein	0.893939	0.0147842	1.06173	0.162787	Unknown function
cg0067	gabD3	succinate-semialdehyde dehydrogenase NADP+ (EC:1.2.1.16)	2.03767	0.00452617	1.04092	0.291025	Amino acid transport and metabolism
cg0070		Putative C-terminal end of phenol hydroxylase, PhoX-family, putative pseudogene	0.612454	0.0825097	1.07073	0.112605	General function prediction only
cg0071		putative protein of metallo-β-lactamase superfamily, RHOD domain	/	/	1.54293	0.0288319	General function prediction only
cg0072		putative membrane protein, conserved	/	/	1.22704	0.280579	Unknown function
cg0073		putative sulfurtransferase, RHOD domain-containing protein	1.08617	0.458714	1.08389	0.070495	General function prediction only
cg0074		putative sulfurtransferase, RHOD domain-containing protein	/	/	1.12086	0.29706	General function prediction only
cg0075		hypothetical protein, conserved	1.13897	0.000409759	1.20523	0.00274643	Unknown function
cg0076		hypothetical protein	/	/	1.10278	0.352192	Unknown function
cg0079		putative secreted protein, CotH homolog	16.7784	0.00161528	0.973548	0.474329	Unknown function
cg0080		putative CorA-like Mg2+/Co2+ transporter protein, MIT-family	1.07414	1.34472e-71	1.0975	0.297478	Inorganic ion transport, metabolism, and storage
cg0081		putative 4-oxalocrotonate tautomerase	0.235024	0.0101551	1.06738	0.131256	Carbon source transport and metabolism
cg0082		putative voltage gated chloride channel, CIC-family	0.814265	0.163136	0.753766	0.0496958	Inorganic ion transport, metabolism, and storage
cg0083		putative nicotinamide mononucleotide uptake permease, nicotinamide mononucleotide NMN uptake permease, PnuC-family	2.76359	0.0159489	0.938127	0.385205	Coenzyme transport and metabolism
cg0085	phoH1	ATPase of PhoH-family related to phosphate starvation-inducible protein, NYN ribonuclease	1.87609	0.230913	1.03562	0.321895	Signal transduction mechanisms
cg0087		putative transmembrane transport protein	0.876877	0.321123	0.734639	0.0242557	General function prediction only
cg0088	citH (citP, citM)	citrate transporter, CitMHS-family	0.722527	0.235729	1.04975	0.198758	Carbon source transport and metabolism
cg0089	citA	two component sensor kinase, citrate homeostasis	1.09725	0.374486	0.945606	0.245767	Post-translational modification; Signal transduction mechanisms
cg0090	citB	two component response regulator, activates citrate uptake in the presence of external citrate	1.2301	0.075228	0.913485	0.122044	Signal transduction mechanisms
cg0091		putative D-isomer specific 2-hydroxyacid dehydrogenase	1.37351	0.0210894	1.1063	0.0340409	General function prediction only
cg0092		putative membrane protein	0.882947	0.327748	1.01705	0.378795	Unknown function
cg0095	bioB	biotin synthase (EC:2.8.1.6)	0.88601	0.284404	0.998334	0.0675331	Coenzyme transport and metabolism
cg0096		hypothetical protein, conserved	0.556516	0.00898655	1.19092	0.0181627	Unknown function
cg0097		putative zinc finger protein, conserved	0.499529	0.150791	1.17592	0.0104418	Unknown function
cg0103	crnT	creatinine transporter	3.05355		1.02196	0.20505	Amino acid transport and metabolism
cg0104	codA	creatinine deaminase	2.0432	0.0387573	1.27074	0.0823411	Amino acid transport and metabolism
cg0105		hypothetical protein	2.7455	0.00748817	1.03052	0.0990884	Unknown function
cg0107		putative secreted protein	1.98997	0.0235941	1.12762	0.00878179	Unknown function
cg0108		putative acetyltransferase/hydrolase, SIR2-like	0.612335	0.120078	1.11903	0.107389	General function prediction only
cg0109	lip1	Triacylglycerol lipase 1 (EC:3.1.1.3)	3.35212	0.0357028	0.993097	0.446024	Lipid transport and metabolism
cg0110	lip2	Triacylglycerol lipase 2 (EC:3.1.1.3)	8.09786	0.0967944	1.36223	0.203599	Lipid transport and metabolism
cg0111		hypothetical protein	0.682791	1.44329e-15	8.67417	6.5762e-05	Unknown function
cg0112	ureR	transcriptional regulator, MarR-family, function in regulation of urea metabolism was proposed but could not be shown so far	1.18629	0.228766	0.966835	0.431893	Signal transduction mechanisms
cg0113	ureA	urease γ subunit (EC:3.5.1.5)	0.180775	0.00244225	1.01508	0.384364	Transport and metabolism of further metabolites
cg0114	ureB	urease β subunit (EC:3.5.1.5)	0.189443	0.00274398	0.986139	0.494483	Transport and metabolism of further metabolites
cg0115	ureC	urease α subunit (EC:3.5.1.5)	0.259004	0.0290718	1.06196	0.0761012	Transport and metabolism of further metabolites
cg0116	ureE	urease accessory protein 1	0.260878	0.01147	1.08	0.0652543	Transport and metabolism of further metabolites
cg0117	ureF	urease accessory protein 2	0.380958	0.181623	1.04798	0.147743	Transport and metabolism of further metabolites
cg0118	ureG	urease accessory protein 3	0.317733	0.0019448	1.14548	0.0611332	Transport and metabolism of further metabolites
cg0119	ureD	urease accessory protein 4	0.430123	0.0450318	1.0679	0.177716	Transport and metabolism of further metabolites
cg0120		putative esterase/lipase/thioesterase-family protein, hydrolase	0.264337	0.0015387	2.68479	0.00528597	General function prediction only
cg0121		putative permease of the major facilitator superfamily	0.795267	0.198939	0.957154	0.202814	General function prediction only
cg0122		putative glycerol 3-phosphate dehydrogenase	1.04105	0.21361	1.25843	0.01219	Lipid transport and metabolism
cg0123	htpG	chaperone protein HSP90-family, heat shock protein	0.825481	0.227897	1.10071	0.0135445	Protein turnover and chaperones
cg0124	amn	AMP nucleosidase (EC:3.2.2.4)	1.533	0.0425626	1.04073	0.18303	Nucleotide transport and metabolism
cg0126		putative thiamine pyrophosphate-requiring enzyme	/	/	0.904062	1.83187e-15	Unknown function
cg0127		putative thiamine pyrophosphate-dependent enzyme	/	/	0.913219	0.325093	Unknown function
cg0128		putative secreted protein, signal peptide	0.716422	0.158377	1.11282	0.299055	Unknown function
cg0129	putA	proline dehydrogenase/δ-1-pyrroline-5-carboxylate dehydrogenase (EC:1.5.99.8)	2.22501	0.0444831	0.790458	0.0552197	Respiration and oxidative phosphorylation; Amino acid transport and metabolism
cg0131		putative oxidoreductase/aldo-keto reductase	1.52532	0.179957	1.24147	0.0153113	General function prediction only
cg0133	abgT	p-aminobenzoyl-glutamate transporter	0.749001	0.280309	1.02404	0.32827	Amino acid transport and metabolism
cg0134	abgB	metal-dependent amidase/aminoacylase/carboxypeptidase, AbgB homolog	0.622814	0.026092	1.07455	0.0965474	Amino acid transport and metabolism
cg0135		putative membrane protein	0.771486	0.222919	1.08864	0.037271	Unknown function
cg0136		putative membrane protein	0.706123	0.151526	1.04906	0.245346	Unknown function
cg0138		putative ATP/GTP-binding protein	1.7381	0.00275756	1.21248	0.0529958	Unknown function
cg0139		putative transcriptional regulator, DeoR-family	1.96103	0.0263877	0.874792	0.110872	Signal transduction mechanisms
cg0141		putative glyoxalase/bleomycin resistance protein/dioxygenase	0.770062	0.0458617	1.14553	0.0888395	General function prediction only
cg0142	sixA	phosphohistidine phosphatase, arabitol-1-phosphatase (EC:3.1.3.-)	1.77924	0.00823853	0.973672	0.438807	Carbon source transport and metabolism
cg0143	mtlD	mannitol-1-phosphate 5-dehydrogenase (EC:1.1.1.17), required for fructose utilization	1.56521	0.0041511	1.0994	0.132973	Carbon source transport and metabolism
cg0144	rbtT	putative ribitol transporter, MFS-type	2.60418	0.00779307	0.901463	0.0650472	Carbon source transport and metabolism
cg0146	atlR (sucR, mtlR)	transcriptional regulator for arabitol metabolism, DeoR-family	1.56856	0.00190877	0.88615	0.119735	Signal transduction mechanisms
cg0147	xylB	xylulose kinase (EC:2.7.1.17)	1.13326	0.241236	0.976392	0.457557	Carbon source transport and metabolism
cg0148	panC	pantoate-β-alanine ligase protein (EC:6.3.2.1), deletion results in D-panthotenate auxotrophic strains	0.218163	0.0102602	0.997405	0.441459	Coenzyme transport and metabolism
cg0149	panB	3-methyl-2-oxobutanoate hydroxymethyltransferase (EC:2.1.2.11), deletion results in D-panthotenate auxotrophic strains	0.730739	0.359452	0.739369	0.0675305	Coenzyme transport and metabolism
cg0150		putative transcriptional regulator, Fic/Doc-family, contains a Fido domain and a winged helix-turn-helix DNA binding domain	0.537197	0.051959	0.774841	0.0561018	Signal transduction mechanisms
cg0151	mag	3-methyladenine DNA glycosylase (EC:3.2.2.21)	0.827138	0.194449	1.01883	0.41635	DNA replication, recombination, repair, and degradation
cg0152		hypothetical protein	1.36821	0.395858	1.07547	0.0824299	Unknown function
cg0153	hde	putative esterase/lipase protein (EC:3.1.1.3)	0.932699	0.377743	1.06363	0.22771	General function prediction only
cg0154		putative haloacid dehalogenase-like hydrolase	1.31577	0.0969201	0.960155	0.21786	General function prediction only
cg0155	gca	carbonic anhydrase, carbonate dehydratase (EC:4.2.1.1)	1.47102	0.0279725	0.989259	0.494097	Inorganic ion transport, metabolism, and storage
cg0156	cysR	transcriptional activator of assimilatory sulfate reduction, ROK-family, controls sulphide production in response to acceptor availability	0.754261	0.184177	1.06308	0.242854	Signal transduction mechanisms
cg0158		putative membrane transport protein, MFS-family	0.588746	0.0537456	1.01913	0.283112	General function prediction only
cg0159		hypothetical protein	2.74693		1.41982	0.187305	Unknown function
cg0160		hypothetical protein	1.111	0.276412	1.09401	0.27624	Unknown function
cg0161		putative membrane protein	1.34532	0.173002	1.15068	0.0489915	Unknown function
cg0162		putative membrane spanning protein	0.853048	0.0850824	1.19795	0.0626877	Unknown function
cg0163		putative N-acetylglucosaminyltransferase	0.571325	0.0694558	1.24816	0.0197555	General function prediction only
cg0165		putative ABC-2-type transporter	1.76008	0.255738	1.11514	0.00345764	General function prediction only
cg0166		putative Ankyrin repeat containing protein, conserved	0.903159	0.334293	1.00033	0.455458	Unknown function
cg0167		putative membrane protein, DUF81-family	0.708444	0.218256	0.858856	0.147022	Unknown function
cg0168		putative secondary chloramphenicol transporter, drug/metabolite transporter DMT superfamily	1.50504		0.675231	0.0448318	Transport and metabolism of further metabolites
cg0170		putative transmembrane protein	0.845305	0.310316	0.83656	0.102572	Unknown function
cg0171		putative secreted protein	1.26003	0.0217905	1.07117	0.234297	Unknown function
cg0172	panD	aspartate 1-decarboxylase precursor (EC:4.1.1.11)	2.06127	0.00649557	0.722792	0.0522739	Amino acid transport and metabolism; Coenzyme transport and metabolism
cg0173		hypothetical protein, conserved	1.47372	0.253106	0.82705	0.0817701	Unknown function
cg0174		putative transport protein, conserved	0.893323	0.387305	1.06464	0.288416	Unknown function
cg0175		putative secreted protein, signal peptide	0.563773	8.32667e-16	1.6293	0.012921	Unknown function
cg0176		putative membrane protein, DUF81-family	0.416415	0.0199858	0.980937	0.324219	Unknown function
cg0177		hypothetical protein	1.68206	0.137472	1.0409	0.0831793	Unknown function
cg0178	hrpB	probable ATP-dependent RNA helicase protein	0.612712	0.0482596	0.892898	0.250668	Transcription including sigma factors, RNA processing and modification
cg0179		putative membrane protein	0.378357	0.0199355	1.458	0.00857806	Unknown function
cg0180	maa	maltose O-acetyltransferase (EC:2.3.1.79)	1.65672	0.0644517	1.34097	0.0437414	Carbon source transport and metabolism
cg0181	alkB	alkylated DNA repair protein	2.09783	0.06412	1.1047	0.296817	DNA replication, recombination, repair, and degradation
cg0182	tagA2	DNA-3-methyladenine glycosylase I protein (EC:3.2.2.20)	2.1518	0.0225586	0.951191	0.412233	DNA replication, recombination, repair, and degradation
cg0183		putative LysE-type translocator, threonine efflux transporter, resistance to homoserine/threonine RhtB-family	1.4077	0.0189685	0.823673	0.10278	Amino acid transport and metabolism
cg0184		hypothetical protein, conserved	0.801868	0.291019	1.048	0.107497	Unknown function
cg0185		putative glyoxalase/bleomycin resistance protein/dioxygenas	1.0059	0.442329	1.08331	0.0367157	General function prediction only
cg0186		putative methylated-DNA-protein-cysteine methyltransferase	0.825449	0.159153	0.959426	0.405899	DNA replication, recombination, repair, and degradation
cg0187	kup	hypothetical protein, conserved	5.03637	0.0044018	0.797881	0.0509485	Unknown function
cg0188		hypothetical protein, conserved	0.332328	0.00935219	0.849614	0.00268615	Unknown function
cg0191		putative translation initiation inhibitor, YjgF-family	0.810666	0.0203512	0.976945	0.456112	General function prediction only
cg0192		hypothetical protein, conserved	1.06566	0.183954	1.12075	0.165883	Unknown function
cg0193	pepO	endopeptidase O (EC:3.4.24.-)	1.32158	0.0178714	1.03278	0.327731	Protein turnover and chaperones
cg0194		putative secreted protein	2.56249	0.0379073	1.1253	0.0358207	Unknown function
cg0195		putative membrane protein	1.19968	0.170005	1.15608	0.0172929	Unknown function
cg0196	iolR	repressor of myo-inositol utilization genes, GntR-family, essential on gluconeogenetic substrates	1.09867	0.311302	0.871946	0.28902	Signal transduction mechanisms
cg0197	iolC	carbohydrate kinase, myo-inositol catabolism	0.345976	0.0403768	0.832993	0.14265	Carbon source transport and metabolism
cg0198		putative protein, conserved, probably involved in myo-inositol metabolism	0.221546	0.0123167	1.02611	0.357436	Carbon source transport and metabolism
cg0199	iolA	aldehyde dehydrogenase, Methylmalonate-semialdehyde dehydrogenase (EC:1.2.1.27), myo-Inositol catabolism	0.226283	0.00674209	1.07035	0.306612	Carbon source transport and metabolism
cg0201	iolB	enzyme involved in inositol metabolism	0.897561	0.322818	1.06802	0.281597	Carbon source transport and metabolism
cg0202	iolD	putative acetolactate synthase, large subunit (EC:2.2.1.6)	0.731553	0.0188818	1.11638	0.264847	Carbon source transport and metabolism
cg0203	iolE	2-Keto-myo-inositol dehydratase (EC:4.2.1.44)	0.680947	0.00374045	1.00151	0.435195	Carbon source transport and metabolism
cg0204	iolG	putative oxidoreductase, myo-inositol 2-dehydrogenase (EC:1.1.1.18)	0.506107	0.0068378	1.03031	0.393586	Carbon source transport and metabolism
cg0205	iolH	myo-inositol catabolism protein	0.6767	0.118406	0.994262	0.397504	Carbon source transport and metabolism
cg0206	iolP	putative myo-inositol permease, MFS-type	1.20686	0.11055	1.00449	0.410385	Carbon source transport and metabolism
cg0207	oxiA	myo-Inositol dehydrogenase, putative oxidoreductase	1.95183	0.0600142	1.06829	0.103593	Carbon source transport and metabolism
cg0208		hypothetical protein	1.87623	0.010406	1.08989	0.100473	Unknown function
cg0209		hypothetical protein	1.98849	0.103016	1.13956	0.113045	Unknown function
cg0210		putative transcriptional regulator, LacI-family	0.683014	0.0142715	0.87381	0.21002	Signal transduction mechanisms
cg0211	oxiB	putative oxidoreductase dehydrogenase	2.9805	0.0554172	1.14915	0.0022358	General function prediction only
cg0212		putative phosphate isomerase/epimerase, conserved	1.44718	0.00147182	1.12821	0.0123467	General function prediction only
cg0214		hypothetical protein	3.04137	0.0362551	0.778138	0.00076459	Unknown function
cg0215	cspA	cold-shock protein A, contains signal peptide for secretion	0.398786	0.0554528	1.08636	0.370329	Transcription including sigma factors, RNA processing and modification
cg0216		putative membrane protein	0.659346	0.0709788	0.854116	0.136634	Unknown function
cg0217		putative transcriptional regulator, ArsR-family	0.636603	0.322526	0.924302	0.115511	Signal transduction mechanisms
cg0218		putative O-methyl transferase N-terminal fragment, putative pseudogene	1.4972	0.072894	0.707816	0.0228169	General function prediction only
cg0219		putative O-methyl transferase C-terminal fragment, putative pseudogene	1.29971	0.17291	0.731424	0.0327416	General function prediction only
cg0220		putative acetyltransferase, GNAT-family	1.07222	0.424701	1.18443	0.00119248	General function prediction only
cg0221		putative transcriptional regulator, LacI-family	0.893474	0.149035	1.00446	0.292319	Signal transduction mechanisms
cg0222		putative membrane protein	2.60262	0.0453376	0.631148	0.185844	Unknown function
cg0223	iolT1	myo-Inositol transporter 1	0.35641	0.00481221	0.779306	0.00547933	Carbon source transport and metabolism
cg0226	tnp2f	transposase	0.327096	0.025468	0.843238	0.117712	DNA replication, recombination, repair, and degradation
cg0228	hkm	putative sensor histidine kinase fragment of two-component system, putative pseudogene	0.273271	0.00649169	0.997941	0.352922	Post-translational modification; Signal transduction mechanisms
cg0229	gltB	glutamine 2-oxoglutarate aminotransferase NADPH large subunit, also glutamate synthase (EC:1.4.1.13)	3.32894	0.168085	0.797385	0.207652	Amino acid transport and metabolism
cg0230	gltD	glutamine 2-oxoglutarate aminotransferase NADPH small subunit, also glutamate synthase (EC:1.4.1.13)	2.96978	0.0170591	0.829516	0.186318	Amino acid transport and metabolism
cg0231		putative membrane protein	1.56791	0.0168879	0.868648	0.0698809	Unknown function
cg0232		putative secreted protein	1.34287	0.102595	1.25161	0.0111658	Unknown function
cg0233		hypothetical protein, conserved	2.97384	0.146202	0.945395	0.318584	Unknown function
cg0235	emb (embC)	arabinosyltransferase	0.476906	0.00180714	1.13621	0.145388	Cell wall/membrane/envelope biogenesis
cg0236	aftA	arabinofuranosyltransferase	0.97343	0.496648	1.02608	0.268225	Cell wall/membrane/envelope biogenesis
cg0237		putative short chain dehydrogenase, or oxidoreductase	1.38181	0.103083	1.23628	0.0258311	General function prediction only
cg0238		putative L-gulonolactone oxidase, FAD/FMN-containing dehydrogenase putativley involved in ascorbate and aldarate metabolism	1.89355	0.114237	1.12018	0.0890139	Carbon source transport and metabolism
cg0239		hypothetical protein	1.5745	0.0391154	0.866486	0.206507	Unknown function
cg0240		putative membrane protein	1.87507	0.0903129	1.10287	0.0122566	Unknown function
cg0241		hypothetical protein, conserved	0.916792	0.357229	1.25256	0.019534	Unknown function
cg0242		hypothetical protein	2.16836	0.0403317	1.12175	0.0266235	Unknown function
cg0243		putative membrane protein	2.60927	0.0474057	0.918747	0.156077	Unknown function
cg0244		putative membrane protein	1.26882	0.00421186	0.837285	0.0990451	Unknown function
cg0245		hypothetical protein, conserved	1.01276	0.330713	0.94864	0.305468	Unknown function
cg0246		putative glycosyl transferase	1.20562	0.169276	1.14756	0.143484	General function prediction only
cg0247		hypothetical protein, conserved	1.39312	0.0302123	1.00811	0.42251	Unknown function
cg0248		putative ABC-type polysaccharide/polyol phosphate export sytem, ATPase component	1.25157	0.150135	0.923041	0.303065	General function prediction only
cg0249		putative polysaccharide/polyol phosphate export systems, permease component	1.59483	0.157959	0.724184	0.108997	General function prediction only
cg0250		putative aminotransferase class V	2.02988	0.0188886	0.899145	0.0150201	General function prediction only
cg0251		putative quinone oxidoreductase (EC:1.6.5.5)	1.23191	0.0202588	1.09022	0.0160354	General function prediction only
cg0252		putative membrane protein	0.336275	0.0256005	1.00251	0.434445	Unknown function
cg0253		putative flavodoxin reductase/2Fe-2S ferredoxin	1.54936	0.210401	1.04036	0.402852	General function prediction only
cg0254		putative amino acid carrier protein sodium/alanine symporter	0.281185	0.0214688	1.1389	0.0239291	Amino acid transport and metabolism
cg0255		hypothetical protein	0.538244	0.0063688	0.9314	0.369828	Unknown function
cg0256		putative protein, conserved	0.222201	0.0772427	0.982018	0.48321	Unknown function
cg0257	moeB	molybdopterin cofactor synthase, subunit 3	0.505213	0.00490283	0.980284	0.293287	Coenzyme transport and metabolism
cg0258	moaE	molybdopterin cofactor synthase, large subunit 2	1.29473	0.233218	0.942844	0.147654	Coenzyme transport and metabolism
cg0259	moaB	molybdopterin cofactor biosynthesis protein, Mog-family	2.16859	0.263772	0.962685	0.0918376	Coenzyme transport and metabolism
cg0260	moaC	molybdopterin cofactor biosynthesis protein C	0.636984	0.0588271	1.15199	0.0552097	Coenzyme transport and metabolism
cg0261	moeA1	molybdopterin cofactor synthesis protein A1, MoeA-family	0.538418	0.0046128	1.08814	0.119101	Coenzyme transport and metabolism
cg0262	modB	putative molybdenum ABC-type transporter, permease component	0.123032	0.0313113	1.38013	0.0216529	Coenzyme transport and metabolism
cg0263	modA	putative molybdenum ABC-type transporter, molybdate-binding secreted protein	0.143496	0.0183391	1.42476	0.0335008	Coenzyme transport and metabolism
cg0264		putative molybdopterin converting factor, small subunit	1.4111	0.0637606	1.00591	0.414306	Coenzyme transport and metabolism
cg0265		putative ABC transporter, ATP-binding protein	1.80946	0.0220334	1.03147	0.389681	General function prediction only
cg0266		putative membrane protein	1.37239	0.11704	1.02626	0.354873	Unknown function
cg0267	aroT (pat)	aminotransferase, uses aromatic amino acids, AT class I (EC:2.6.1.9), deletion causes auxotrophy for Leu/Ile/Phe	2.10039	0.0186121	0.854019	0.0659157	Amino acid transport and metabolism
cg0269		hypothetical protein, conserved	1.29322	0.0556274	0.954612	0.408266	Unknown function
cg0270		hypothetical protein	2.24903	0.00957258	1.12179	0.0295269	Unknown function
cg0272		putative transcriptional regulator, LysR-family	2.36976	0.175886	1.08849	0.294059	Signal transduction mechanisms
cg0273		putative alcohol dehydrogenase, type III (EC:1.1.1.1)	1.64195	0.242046	1.17145	0.0739264	General function prediction only
cg0274	maoA	putative oxidoreductase, maybe involved in oxidative stress response	/	/	1.19131	0.200874	Carbon source transport and metabolism
cg0275	mgtE2	Mg2+ transporter, MgtE-family	2.5878	0.00815139	1.02142	0.333914	Inorganic ion transport, metabolism, and storage
cg0277	dccT (dcsT)	dicarboxylate uptake system for succinate, fumarate or L-malate, DASS-family	0.463544	0.0213224	1.07378	0.247096	Carbon source transport and metabolism
cg0279	tyrA	prephenate dehydrogenase (EC:1.3.1.12), essential	1.28212	0.0992011	0.841633	0.176396	Amino acid transport and metabolism
cg0280		hypothetical protein, conserved	1.14075	0.167646	0.549092	0.104269	Unknown function
cg0281		putative cytosine deaminase, tRNA-specific adenosine deaminase (EC:3.5.4.-)	0.730098	0.355454	0.891248	0.295836	Transcription including sigma factors, RNA processing and modification
cg0282	cybD	putative protein, CsbD-family, probably involved in stress response	1.25821	0.0746486	1.22795	0.0130223	General function prediction only
cg0283		putative membrane protein	0.776912	0.00981261	0.788284	0.128186	Unknown function
cg0284		Associated with mycolic acid metabolism	0.410077	0.015695	1.05538	0.204541	Cell wall/membrane/envelope biogenesis
cg0285	tgt	putative tRNA-guanine transglycosylase, queuine tRNA-ribosyltransferase (EC:2.4.2.29)	1.14127	0.287393	1.17117	0.00340477	Transcription including sigma factors, RNA processing and modification
cg0286		putative membrane protein, conserved	1.19485	0.233353	1.29857	0.0512146	Unknown function
cg0287		putative protein, similar to malic enzyme	1.38741		0.732336	0.0813433	General function prediction only
cg0288		putative ABC transporter, transmembrane and ATPase subunit	0.643017	1.33227e-15	0.744581	0.0435208	General function prediction only
cg0289	gltX	glutamyl-tRNA synthetase (EC:6.1.1.17)	1.46331	0.000220303	1.10715	0.0447881	Translation, ribosomal structure and biogenesis
cg0291		putative 3,4-dioxygenase β subunit	6.95615	0.00478315	1.4343	0.00588506	General function prediction only
cg0292	tnp16a	transposase	0.944952	0.380522	1.29916	0.151791	DNA replication, recombination, repair, and degradation
cg0293		hypothetical protein	1.63207	0.142938	0.725118	0.18402	Unknown function
cg0294	aspT (aspB)	aspartate aminotransferase, AT class I (EC:2.6.1.1)	1.2808	0.156511	1.07516	0.225518	Amino acid transport and metabolism
cg0295		hypothetical protein, conserved	1.1613	0.0987497	1.16311	0.115455	Unknown function
cg0296	dnaZX	DNA polymerase III, subunits γ and τ (tau) (EC:2.7.7.7)	0.88927	0.217381	1.02223	0.31733	DNA replication, recombination, repair, and degradation
cg0297		putative BCR protein, YbaB-family COG0718, DUF149-family	0.96596	0.479015	1.07883	0.0915093	Unknown function
cg0298	recR	recombination protein	3.00454	0.255996	0.853053	0.0602011	DNA replication, recombination, repair, and degradation
cg0299	cobQ	cobyric acid synthase	1.28338	0.0235119	1.11965	0.0263351	Coenzyme transport and metabolism
cg0300		putative tripeptide synthase involved in murein formation	0.981997	0.479646	0.984082	0.466151	Cell wall/membrane/envelope biogenesis
cg0302		putative DNA polymerase III subunit ε or related 3-5 exonuclease, maybe essential	1.033	0.390819	1.00929	0.385499	DNA replication, recombination, repair, and degradation
cg0303	leuA	2-isopropylmalate synthase (EC:2.3.3.13)	0.440883	0.16031	1.01951	0.288074	Amino acid transport and metabolism
cg0304		putative membrane protein	1.36145	0.0262856	0.852881	0.114039	Unknown function
cg0306	lysC	aspartate kinase (EC:2.7.2.4), deletion causes lysine-auxotrophy	1.3229	0.263857	1.0105	0.40502	Amino acid transport and metabolism
cg0307	asd	aspartate-semialdehyde dehydrogenase (EC:1.2.1.11), deletion causes lysine-auxotrophy	0.969932	0.490649	1.06863	0.2571	Amino acid transport and metabolism
cg0308		putative membrane protein	1.46374	0.064993	1.00378	0.449686	Unknown function
cg0309	sigC	RNA polymerase σ factor, ECF-family, control of branched quinol oxidation pathway	0.862014	0.0925193	0.744644	0.0251157	Transcription including sigma factors, RNA processing and modification
cg0310	katA	catalase (EC:1.11.1.6)	1.24049	0.126379	1.10726	0.0420034	Inorganic ion transport, metabolism, and storage
cg0311		putative secreted protein	0.715237	2.77556e-15	1.27159	0.0329212	Unknown function
cg0313	lrp	transcriptional activator, AsnC-family, controls the export system for l-methionine and branched-chain amino acids (leucine, isoleucine, valine)	0.702404	0.151297	0.876407	0.157682	Signal transduction mechanisms
cg0314	brnF	branched chain amino acid exporter Ile, Leu, Val, Met, large subunit	/	/	1.22665	0.155229	Amino acid transport and metabolism
cg0315	brnE	branched chain amino acid exporter Ile, Leu, Val, Met, small subunit	0.953288	0.477823	0.931709	0.371381	Amino acid transport and metabolism
cg0316		putative secreted protein	0.784674	0.182669	1.18416	0.035978	Unknown function
cg0317	arsR2	arsenate/arsenite transcriptional regulator, ArsR-family, function predicted, experimentally proven?	0.818359	0.267355	0.929304	0.30289	Signal transduction mechanisms
cg0318	arsC1 (arsB2)	arsenite permease, arsenical resistance-3 (ACR3)-family	0.902881	0.434748	1.05892	0.229596	Inorganic ion transport, metabolism, and storage
cg0319	arsC2 (arsX)	arsenate reductase, arsenical pump modifier (EC:1.20.4.1)	2.05252	0.162213	0.953659	0.44888	Inorganic ion transport, metabolism, and storage
cg0321	mrpG1 (mnhG)	subunit 6 of Na+K+/H+ antiporter Mrp1	0.658877	3.74473e-05	1.03306	0.369723	Inorganic ion transport, metabolism, and storage
cg0322	mrpF1 (mnhF)	subunit 5 of Na+K+/H+ antiporter Mrp1	0.309637	0.0126204	1.04532	0.0676283	Inorganic ion transport, metabolism, and storage
cg0323	mrpE1 (mnhE)	subunit 4 of Na+K+/H+ antiporter Mrp1	0.590275	0.232274	0.985296	0.494894	Inorganic ion transport, metabolism, and storage
cg0324	mrpD1 (mnhD)	subunit 3 of Na+K+/H+ antiporter Mrp1	1.41416	0.353588	1.08251	0.280115	Inorganic ion transport, metabolism, and storage
cg0325	mrpC1 (mnhC)	subunit 2 of Na+K+/H+ antiporter Mrp1	0.403366	0.0522759	1.07056	0.176296	Inorganic ion transport, metabolism, and storage
cg0326	mrpA1 (mnhAB)	subunit 1 of Na+K+/H+ antiporter Mrp1), fusion of subunits A and B (mrpAB)	0.506691	0.0232793	1.02095	0.407572	Inorganic ion transport, metabolism, and storage
cg0327		putative membrane protein	1.14535	0.432769	1.01268	0.447308	Unknown function
cg0328		hypothetical protein	3.20863		0.893065	0.161733	Unknown function
cg0330	cgtR1	two component response regulator	1.14398	0.094039	0.969598	0.271194	Signal transduction mechanisms
cg0331	cgtS1	two component sensor kinase	1.06577	0.320833	0.798872	0.0477047	Post-translational modification; Signal transduction mechanisms
cg0332		putative secreted protein	1.45943		1.17401	0.216524	Unknown function
cg0333		putative membrane protein	3.2562	0.0253969	0.921396	0.0153001	Unknown function
cg0334		putative secreted phosphohydrolase, probable acting as esterase	0.853495	0.0522018	1.16468	0.0671432	General function prediction only
cg0335		putative protein, GatB/Yqey domain, conserved	1.21684	0.237924	1.00533	0.409556	Unknown function
cg0336	pbp1a	penicillin-binding protein 1A (EC:2.4.2.-)	1.45626	0.0391976	1.14744	0.0155571	Cell wall/membrane/envelope biogenesis
cg0337	whcA (whiB4)	negative role in SigH-mediated oxidative stress response, WhiB homolog	0.348147	0.00308438	0.987565	0.49773	Cell wall/membrane/envelope biogenesis
cg0338		hypothetical protein, conserved	0.956624	0.484627	0.999568	0.447207	Unknown function
cg0339		putative translation initiation inhibitor, similar to endoribonuclease L-PSP, conserved	1.15694	0.123559	1.03519	0.351415	General function prediction only
cg0340	phdT	Phenylpropanoid transporter, MFS-type; involved in degradation of aromatic compounds	1.9792	0.0255731	0.909734	0.206856	Carbon source transport and metabolism
cg0341	phdA (fadD1)	acyl:CoA ligase transmembrane protein; involved in degradation of aromatic compounds	1.66279	0.0017125	0.648225	0.0253334	Carbon source transport and metabolism
cg0343	phdR	Repressor of phd operon, MarR-family; involved in degradation of aromatic compounds (phenlypropanoids)	0.924038	0.362954	0.919557	0.146272	Signal transduction mechanisms
cg0344	phdB (fabG1)	3-hydroxyacyl-CoA dehydrogenase; involved in degradation of aromatic compounds	1.86321	0.0569468	1.05507	0.340932	Carbon source transport and metabolism
cg0345	phdC	3-oxoacyl-CoA ketohydrolase (acetyl-CoA forming); involved in degradation of aromatic compounds	1.05211	0.456513	1.15557	0.217948	Carbon source transport and metabolism
cg0346	phdD (fadE)	acyl-CoA dehydrogenase; involved in degradation of aromatic compounds	1.86249	0.00102625	1.19876	0.044099	Carbon source transport and metabolism
cg0347	phdE (hdtZ)	enoyl-CoA hydratase; involved in degradation of aromatic compounds	1.10349	0.411136	1.29108	0.0967061	Carbon source transport and metabolism
cg0349		putative metallo-β-lactamase superfamily protein	1.19122	0.10894	0.907453	0.116471	General function prediction only
cg0350	glxR	cAMP-dependent global transcriptional regulator, Crp-family	1.57714	0.0323537	0.922206	0.148468	Signal transduction mechanisms
cg0352		putative secreted protein	0.918361	0.365105	0.710293	0.00054467	Unknown function
cg0353	nth	probable endonuclease III protein (EC:4.2.99.18)	0.878302	0.310054	0.916116	0.124513	General function prediction only
cg0354		putative thioredoxin-related protein, secreted thio-disulfide isomerase	0.961527	0.447087	0.963701	0.245589	Inorganic ion transport, metabolism, and storage
cg0355		putative NTP pyrophosphohydrolase (EC:3.4.21.-)	1.07684	0.10885	0.88611	0.223113	General function prediction only
cg0356		putative serine protease, membrane protein	0.713914	0.0171566	0.887069	0.132354	General function prediction only
cg0358		putative hydrolase or acyltransferase	0.782836	0.0292313	0.71975	0.0402392	General function prediction only
cg0359		putative membrane protein	1.24619	0.00845271	0.787946	0.0956698	Unknown function
cg0360		putative phosphatase, conserved	1.09099	0.0058605	0.890515	0.0697215	General function prediction only
cg0362		putative septum site determining protein, conserved	1.98872		1.16217	0.0834441	General function prediction only
cg0363		putative secretion ATPase protein	1.31431	0.203276	1.25943	0.143844	General function prediction only
cg0364		putative membrane protein	2.93854	0.103628	1.086	0.0512977	Unknown function
cg0365		putative membrane protein	2.93892	0.0104884	1.39117	0.00375432	Unknown function
cg0366		putative membrane protein, conserved	1.65589	0.31903	1.42651	0.0237542	Unknown function
cg0368		putative secreted protein, conserved	1.71014	0.0841525	1.26086	0.0209331	Unknown function
cg0369		putative secreted protein, conserved	1.30435	0.104987	1.31037	0.0822375	Unknown function
cg0370		putative ATP-dependent RNA helicase, DEAD/DEAH box-family	1.60671	0.0132407	0.72562	0.0479059	Transcription including sigma factors, RNA processing and modification
cg0371	cspA2	cold-shock protein A2	0.816685	0.155288	1.01237	0.449961	Transcription including sigma factors, RNA processing and modification
cg0372		hypothetical protein	0.74918	0.204721	0.941562	0.369825	Unknown function
cg0373	topA	DNA topoisomerase I (EC:5.99.1.2)	0.642662	0.0649411	1.03005	0.275921	DNA replication, recombination, repair, and degradation
cg0374		hypothetical protein, conserved	1.299	0.0960806	1.03797	0.431802	Unknown function
cg0375	cyaB	adenylate cyclase (EC:4.6.1.1)	2.42356	0.0195363	0.865898	0.0411975	Signal transduction mechanisms
cg0376	dnaX	putative DNA polymerase III, δ subunit (EC:2.7.7.7), maybe essential	1.26675	0.0989598	1.06111	0.0687721	DNA replication, recombination, repair, and degradation
cg0378		putative phage-associated protein	0.387947	0.00606026	0.894463	0.227147	General function prediction only
cg0380		hypothetical protein	0.746868	0.18331	0.884276	0.177481	Unknown function
cg0382		putative adenylate kinase or related kinase, conserved	1.23141	0.276891	0.945864	0.429502	General function prediction only
cg0384	rluC1	ribosomal large subunit pseudouridine synthase C (EC:4.2.1.70)	1.42565	0.164147	0.93928	0.191116	Translation, ribosomal structure and biogenesis
cg0385	bglS	β-glucosidase precursor-N-terminal domain, putative pseudogene	0.682342	0.393638	1.08014	0.162519	Carbon source transport and metabolism
cg0386	bglS	β-glucosidase-C-terminal domain, putative pseudogene	/	/	1.38094	0.0164036	Carbon source transport and metabolism
cg0387	adhE (fadH)	zinc-type alcohol dehydrogenase transmembrane, NAD-linked mycothiol-dependent formaldehyde dehydrogenase (EC:1.2.1.66)	0.566306	0.356145	0.965248	0.267843	Carbon source transport and metabolism
cg0388		putative Zn-dependent hydrolase	0.166671	0.0124349	1.22615	0.149266	General function prediction only
cg0389		putative short chain dehydrogenase	0.748545	0.13105	1.07492	0.098962	General function prediction only
cg0390		putative permease, major facilitator-family	1.037	0.299929	0.926531	0.105018	General function prediction only
cg0391	rmlB2	putative dTDP-glucose 4,6-dehydratase (EC:4.2.1.46)	0.711543	0.168494	0.828857	0.0229454	Nucleotide transport and metabolism
cg0393		putative membrane protein, conserved	1.07322	0.293257	0.97607	0.463963	Unknown function
cg0394		putative glycosyl transferase	1.90719	0.152968	0.841475	0.252893	General function prediction only
cg0395		putative ribonuclease H	2.31898	0.0584694	1.06905	0.162653	Transcription including sigma factors, RNA processing and modification
cg0396		putative glycosyl transferase	1.91747	0.0220257	1.33236	0.00470758	General function prediction only
cg0397	ushA	putative 5-nucleotidase precursor (EC:3.1.3.5), part of Pi starvation stimulon	2.01381	0.0128465	0.996641	0.474715	DNA replication, recombination, repair, and degradation; Inorganic ion transport, metabolism, and storage
cg0398		hypothetical protein	2.23545	0.134893	0.976297	0.468271	Unknown function
cg0399		hypothetical protein	1.76274	0.0235637	0.948968	0.291683	Unknown function
cg0400	adhC	alcohol dehydrogenase, class C, NADP+ (EC:1.1.1.2)	0.867922	0.125079	1.1169	0.0211156	Carbon source transport and metabolism
cg0401	rmlA1	TDP-glucose pyrophosphorylase, Glucose-1-phosphate thymidylyltransferase (EC:2.7.7.24)	1.5989	0.161749	1.03606	0.182197	Nucleotide transport and metabolism
cg0402	rmlCD	dTDP-4-dehydrorhamnose 3,5-epimerase, dTDP-dehydrorhamnose reductase (EC:1.1.1.133)	1.01848	0.284921	1.07751	0.207512	Nucleotide transport and metabolism
cg0403	rmlB1	dTDP-glucose 4,6-dehydratase (EC:4.2.1.46)	1.00524	0.437012	0.770935	0.0160479	Nucleotide transport and metabolism
cg0404		putative protein of nitroreductase-family, conserved, maybe involved in stress response	0.910629	0.162461	0.853914	0.0101085	General function prediction only
cg0405		putative secreted siderophore-binding lipoprotein of ABC-type ironIII dicitrate transporter	1.26947	0.262707	0.915772	0.210439	Inorganic ion transport, metabolism, and storage
cg0407		putative secreted protein	0.534271	0.0751632	0.825038	0.0904603	Unknown function
cg0408		putative membrane protein	0.951043	0.483356	1.07241	0.0469649	Unknown function
cg0409		putative metallopeptidase	1.53583	0.138189	1.06906	0.208867	General function prediction only
cg0410		putative prolyl endopeptidase	1.77624	0.018508	1.14222	0.127855	Protein turnover and chaperones
cg0411		putative membrane protein	0.26752	0.0305093	0.764493	0.0824897	Unknown function
cg0412		putative membrane protein	3.01226	0.0334462	0.880965	0.123313	Unknown function
cg0413	cmt1	trehalose corynomycolyl transferase (EC:2.3.1.122), cop1, cmt1, and cmt2 can replace each other in the synthesis	2.69003	0.0116573	0.894815	0.208586	Cell wall/membrane/envelope biogenesis
cg0414	wzz	cell surface polysaccharide biosynthesis / chain length determinant protein	0.437809	0.013087	0.895182	0.0655216	Cell wall/membrane/envelope biogenesis
cg0415	ptpA2	putative protein-tyrosine-phosphatase (EC:3.1.3.48), horizontally transferred	0.310853	0.0807125	0.949304	0.289931	Unknown function
cg0416		putative secreted protein, carrying a eukaryotic domain, horizontally transferred	0.878411	0.362109	0.981217	0.479727	Unknown function
cg0417	capD	putative dTDP-glucose 4,6-dehydratase transmembrane protein EC:4.2.1.46, horizontally transferred	1.04437	0.138817	1.05417	0.103073	Nucleotide transport and metabolism
cg0418		putative aminotransferase, involved in cell wall biosynthesis, horizontally transferred	0.593694	0.0291741	1.07532	0.16919	Cell wall/membrane/envelope biogenesis
cg0419		putative glycosyltransferase, horizontally transferred	0.739662	0.0708506	1.1022	0.119597	General function prediction only
cg0420		putative glycosyltransferase, horizontally transferred	1.72498	0.0107824	0.924496	0.0547055	General function prediction only
cg0421	wzx	putative translocase involved in export of a cell surface polysaccaride, horizontally transferred	2.55548	0.0343904	1.02261	0.146338	Cell wall/membrane/envelope biogenesis
cg0422	murA	UDP-N-acetylglucosamine 1-carboxyvinyltransferase (EC:2.5.1.7), horizontally transferred	0.848544	0.339912	1.11853	0.0899318	Cell wall/membrane/envelope biogenesis
cg0423	murB	UDP-N-acetylenolpyruvoylglucosamine reductase (EC:1.1.1.158), horizontally transferred	1.32579	0.0399623	1.1216	0.0800367	Cell wall/membrane/envelope biogenesis
cg0424		putative glycosyltransferase, horizontally transferred	1.14877	0.0865932	1.06597	0.226826	General function prediction only
cg0426	tnp17a	transposase fragment, putative pseudogene, horizontally transferred	1.8581	0.0149277	0.902282	0.0735662	DNA replication, recombination, repair, and degradation
cg0427	tnp17b	transposase fragment, putative pseudogene, horizontally transferred	2.91309	0.0142622	0.887917	0.344374	DNA replication, recombination, repair, and degradation
cg0428	tnp17c	transposase fragment, putative pseudogene, horizontally transferred	1.98317	0.127047	1.28892	0.0732993	DNA replication, recombination, repair, and degradation
cg0431		putative membrane protein, involved in polysaccharide acetylation, horizontally transferred	1.34187	0.0575734	0.885261	0.137047	General function prediction only
cg0432		putative lipopolysaccharide modification acyltransferase, expression is under the control of autoinducers, horizontally transferred	0.853616	0.0614851	0.937119	0.26728	Cell wall/membrane/envelope biogenesis
cg0435	udgA1	UDP-glucose 6-dehydrogenase (EC:1.1.1.22), horizontally transferred	0.847457	0.142491	1.24718	0.0181094	Nucleotide transport and metabolism
cg0436		hypothetical protein, horizontally transferred	0.814308	0.269902	0.717646	0.195395	Unknown function
cg0437	wzy	putative membrane protein, involved in polysaccharide polymerization, horizontally transferred	1.2952	0.366526	0.890559	0.0963518	Cell wall/membrane/envelope biogenesis
cg0438		putative glycosyltransferase, horizontally transferred	0.653442	0.0813766	0.889628	0.168371	General function prediction only
cg0439		putative acetyl transferase EC:2.3.1.-, horizontally transferred	1.15731	0.39342	1.04472	0.276313	General function prediction only
cg0440		hypothetical protein, horizontally transferred	1.76025	0.0127215	0.836642	0.248195	General function prediction only
cg0441	lpd	dihydrolipoamide dehydrogenase (EC:1.8.1.4), not E2 of PDHc and ODHc, horizontally transferred	0.372464	0.0204047	1.1691	0.149081	Coenzyme transport and metabolism
cg0442	galU2	putative UTP-glucose-1-phosphate uridylyltransferase EC:2.7.7.9, horizontally transferred	0.0786676	0.00132524	1.08773	0.321785	Carbon source transport and metabolism
cg0443		Cys-tRNA(Pro)/Cys-tRNA(Cys) deacylase	0.399048	0.0581233	0.862879	0.0302302	General function prediction only
cg0444	ramB	transcriptional regulator, involved in acetate metabolism, MerR-family	0.456016	0.0949525	0.817513	0.27767	Signal transduction mechanisms
cg0445	sdhC sdhCD	succinate:menaquinone oxidoreductase, cytochrome b subunit	0.415364	0.0181999	1.08147	0.232897	Central carbon metabolism; Anaerobic metabolism; Respiration and oxidative phosphorylation
cg0446	sdhA	succinate:menaquinone oxidoreductase, flavoprotein subunit	0.431722	0.0175594	1.07337	0.280795	Central carbon metabolism; Anaerobic metabolism; Respiration and oxidative phosphorylation
cg0447	sdhB	succinate:menaquinone oxidoreductase, iron-sulfur protein subunit	0.438342	0.0226057	1.18665	0.103712	Central carbon metabolism; Anaerobic metabolism; Respiration and oxidative phosphorylation
cg0448		putative membrane protein, conserved 4th subunit of SQO?	0.270087	0.0213294	1.20096	0.0497583	Central carbon metabolism; Anaerobic metabolism; Respiration and oxidative phosphorylation
cg0449		hypothetical protein	3.04707	0.330007	0.936094	0.398153	Unknown function
cg0450		hypothetical protein, conserved	1.33923	0.135841	1.19199	0.0227571	Unknown function
cg0451		putative membrane protein	2.07617	0.00521883	1.12901	0.128064	Unknown function
cg0452		hypothetical protein	1.21552	0.107852	1.06809	0.18455	Unknown function
cg0453		putative membrane protein	2.40546	0.00676208	1.06055	0.243561	Unknown function
cg0454	mfsR	transcriptional regulator, TetR-family, multidrug resistance	2.32545	0.0224482	0.801004	0.0350439	Signal transduction mechanisms
cg0455		putative permease, major facilitator superfamily	2.37813	0.0242876	0.923963	0.331225	General function prediction only
cg0456		putative permease, major facilitator superfamily	1.8165	0.0850645	1.11501	0.166477	General function prediction only
cg0457	purU	formyltetrahydrofolate deformylase	0.708992	0.162128	1.03216	0.338543	Coenzyme transport and metabolism; Nucleotide transport and metabolism; Carbon source transport and metabolism
cg0458	deoC	deoxyribose-phosphate aldolase (EC:4.1.2.4)	0.984957	0.482086	0.926708	0.200791	Central carbon metabolism; Nucleotide transport and metabolism
cg0462		hypothetical protein, conserved	0.617781	0.0200345	0.907059	0.297461	Unknown function
cg0463	csoR	transcriptional repressor during copper starvation	1.25001	0.0916449	0.994857	0.425296	Signal transduction mechanisms; Inorganic ion transport, metabolism, and storage
cg0464	copA (ctpA, ctpV)	copper-transporting P-type ATPase (EC:3.6.3.4)	0.770996	0.151456	1.16753	0.0650365	Inorganic ion transport, metabolism, and storage
cg0465		putative membrane protein, conserved	5.21315	0.168469	1.10514	0.212788	Unknown function
cg0466	htaA	secreted heme transport-associated protein	1.74923	0.0148354	1.11178	0.225825	Transport and metabolism of further metabolites
cg0467	hmuT	hemin-binding periplasmic protein precursor	2.11747	0.012883	1.0484	0.251117	Transport and metabolism of further metabolites
cg0468	hmuU	hemin transport system, permease protein	1.38431	0.158727	1.10956	0.218067	Transport and metabolism of further metabolites
cg0469	hmuV	hemin transport system, ATP-binding protein	3.62028		1.12308	0.0611094	Transport and metabolism of further metabolites
cg0470	htaB	secreted heme transport-associated protein	14.1861	0.000843873	1.1093	0.317905	Transport and metabolism of further metabolites
cg0471	htaC	secreted heme transport-associated protein	5.88965	0.139338	1.07047	0.39101	Transport and metabolism of further metabolites
cg0472		hypothetical protein, conserved	4.52863	4.73758e-05	0.815371	0.14889	Unknown function
cg0474		hypothetical protein, conserved	0.827239	0.204581	0.995212	0.4197	Unknown function
cg0475		hypothetical protein, conserved	1.40547	0.072483	1.07213	0.231926	Unknown function
cg0476	murB2	putative UDP-N-acetylenolpyruvoylglucosamine reductase EC:1.1.1.158	1.75757	0.121822	0.943704	0.06183	Cell wall/membrane/envelope biogenesis
cg0477		hypothetical protein	0.921471	0.233108	1.16612	0.0161329	Unknown function
cg0478		hypothetical protein	1.21884	0.158037	0.759463	0.0124284	Unknown function
cg0479		hypothetical protein	/	/	0.920226	3.4972e-15	Unknown function
cg0480	fadD5 (fcs)	acyl-coA synthase, N. Kallscheuer based on Shen et al., 2012:, putative feruloyl-CoA/caffeoyl-CoA/p-coumaroyl-CoA synthetase (EC:6.2.1.34)	1.43455	0.223674	0.924147	0.294871	Carbon source transport and metabolism
cg0481	mshA	glycosyltransferase,involved in mycothiol biosynthesis (EC:2.4.1.14), catalyzes the transfer of N-acetylglucosamine from UDP-N-acetylglucosamine to 1-l-myo-inositol-1-phosphate in the first committed step of mycothiol biosynthesis.	1.51862	0.0590755	1.04129	0.299032	Transport and metabolism of further metabolites
cg0482	gpmA	phosphoglyceromutase (EC:5.4.2.1), also important role for cell division and morphology	0.476355	0.0151747	1.16493	0.0570887	Central carbon metabolism
cg0483	senX3 (cgtS4)	two component sensor kinase	1.02536	0.459752	1.00204	0.406934	Post-translational modification; Signal transduction mechanisms
cg0484	regX3 (cgtR4)	two component response regulator	0.814928	0.18552	1.02053	0.263465	Signal transduction mechanisms
cg0485		hypothetical protein	1.93993	0.262476	0.983111	0.458584	Unknown function
cg0486		putative ABC transporter integral membrane protein	4.88469	0.0020702	0.690252	0.0345369	General function prediction only
cg0487		putative secreted protein, conserved	1.61391	0.0128275	0.915115	0.0934595	Unknown function
cg0488	ppx1	exopolyphosphatase, Ppx/GppA-family (EC:3.6.1.11)	0.6852	0.0393342	0.927757	0.0621794	Inorganic ion transport, metabolism, and storage
cg0489		putative membrane protein	1.76349	0.17189	1.08978	0.113629	Unknown function
cg0490	proC	pyrroline-5-carboxylate reductase (EC:1.5.1.2)	1.54664	0.0023704	1.05137	0.0237497	Amino acid transport and metabolism
cg0491		hypothetical protein	1.03395	0.354299	1.07026	0.0736729	Unknown function
cg0492		putative DNA-binding excisionase protein, extremely conserved	0.382092	0.0097803	0.970289	0.308601	DNA replication, recombination, repair, and degradation
cg0493		hypothetical protein	0.952948	0.483682	0.897415	0.089978	Unknown function
cg0494		hypothetical protein, extremely conserved	0.453755	0.031923	0.872562	0.0643335	Unknown function
cg0495		putative phosphatase (EC:3.1.3.3)	0.187917	0.000225183	0.832624	0.00351938	General function prediction only
cg0496	mrx3	mycoredoxin 3	0.13583	0.123659	0.956738	0.111552	Transport and metabolism of further metabolites
cg0497	hemA	glutamyl-tRNA reductase, involved in heme biosynthesis	0.938603	0.458125	0.9485	0.131807	Transport and metabolism of further metabolites
cg0498	hemC	porphobilinogen deaminase, involved in heme biosynthesis	1.31541	0.0881739	1.02653	0.334681	Transport and metabolism of further metabolites
cg0499		hypothetical protein	0.84249	0.188779	0.957311	0.286829	Unknown function
cg0500	qsuR	transcriptional activator of qsuABCD genes, LysR-family	0.658741	0.0763046	0.979746	0.467623	Signal transduction mechanisms
cg0501	qsuA	putative shikimate permease, MFS-type	0.712238	0.0704504	0.839904	0.0191663	Amino acid transport and metabolism
cg0502	qsuB	putative dehydroshikimate dehydratase, 2 domain protein	0.696318	0.0677519	0.961926	0.423899	Amino acid transport and metabolism
cg0503	qsuC (aroD)	3-dehydroquinate dehydratase EC:4.2.1.10, essential	1.13336	0.274209	0.915547	0.292181	Amino acid transport and metabolism
cg0504	qsuD (aroE)	putative shikimate 5-dehydrogenase or an NAD-dependent quinate dehydrogenase EC:1.1.1.25, essential	1.01908	0.311876	0.96734	0.394127	Amino acid transport and metabolism
cg0505		putative ribosomal protein L7/L12-family	1.52865	0.0538005	0.938144	0.0560608	Translation, ribosomal structure and biogenesis
cg0506		putative ABC-type putative spermidine/putrescine/ironIII transporter, ATPase subunit	0.115606	0.00365866	1.26625	0.01045	General function prediction only
cg0507		putative ABC-type putative spermidine/putrescine/ironIII transporter, permease subunit	0.038051	0.00236129	1.12508	0.0345049	General function prediction only
cg0508		putative ABC-type putative spermidine/putrescine/ironIII transporter, substrate-binding lipoprotein	0.0106919	0.00699821	1.4727	0.0114776	General function prediction only
cg0510	hemD	uroporphyrinogen III synthase/methyltransferase (EC:4.2.1.75), involved in heme biosynthesis	0.709286	0.0380037	0.731925	0.0118775	Transport and metabolism of further metabolites
cg0511		hypothetical protein	2.91963	0.021675	0.87108	0.0226535	Unknown function
cg0512	hemB	δ-aminolevulinate dehydratase, involved in heme biosynthesis	2.14926	0.0159712	1.05372	0.171368	Transport and metabolism of further metabolites
cg0513		putative membrane protein	2.09983	0.0534428	1.19576	0.0400549	Unknown function
cg0514		putative membrane protein	1.99491	0.00295188	1.13917	0.030227	Unknown function
cg0515		putative cation-transporting p-type ATPase	1.70601	0.0118483	1.11485	0.0140739	General function prediction only
cg0516	hemE	uroporphyrinogen decarboxylase (EC:4.1.1.37), involved in heme biosynthesis	1.15542	0.248479	1.05404	0.337377	Transport and metabolism of further metabolites
cg0517	hemY	protoporphyrinogen oxidase (EC:1.3.3.4), involved in heme biosynthesis	3.78674	0.154566	1.09231	0.283004	Transport and metabolism of further metabolites
cg0518	hemL	glutamate-1-semialdehyde 2,1-aminomutase, AT class II EC:5.4.3.8 involved in heme biosynthesis	0.948458	0.437378	1.04687	0.218352	Transport and metabolism of further metabolites
cg0519		putative phosphoglycerate mutase, involved in heme biosynthesis	1.11375	0.338665	1.06952	0.146588	Transport and metabolism of further metabolites
cg0520	ccsX	putative secreted thiol-disulfide isomerase or thioredoxin, involved in cytochrome c biosynthesis	1.64253	0.0261515	1.02826	0.241097	Transport and metabolism of further metabolites
cg0522	ccsA	cytochrome c biogenesis protein, membrane protein, DsbD-family	1.50076	0.00204581	0.983755	0.479854	Transport and metabolism of further metabolites
cg0523		putative cytochrome c biogenesis membrane protein, ResB-family	1.29521	0.0988298	0.965755	0.413	Transport and metabolism of further metabolites
cg0524	ccsB	cytochrome c assembly membrane protein, CcsA-family	2.22573	0.0956324	1.01813	0.330572	Transport and metabolism of further metabolites
cg0527	glyR	transcriptional regulator of glyA cg1133, ArsR-family	2.68078	0.0137985	0.620432	0.201031	Signal transduction mechanisms
cg0528		putative secreted protein	1.76441	0.133911	1.26175	0.00387041	Unknown function
cg0530		hypothetical protein	1.57272	0.0775773	1.08546	0.226178	Unknown function
cg0531	menA	1,4-dihydroxy-2-naphthoate octaprenyltransferase, involved in menaquinone biosynthesis	1.29299	0.235395	0.975974	0.420979	Coenzyme transport and metabolism
cg0532		putative glycosyltransferase	1.04396	0.405741	0.911689	0.238898	General function prediction only
cg0533	menE	O-succinylbenzoic acid-CoA ligase (EC:6.2.1.26), , involved in menaquinone biosynthesis	5.14412	3.45278e-05	0.974601	0.40141	Coenzyme transport and metabolism
cg0534		putative integral membrane protein	4.05035	0.0230102	1.08097	0.170809	Unknown function
cg0535		putative ketoglutarate semialdehyde dehydrogenase	0.875641	0.330181	1.22461	0.00141465	Carbon source transport and metabolism
cg0536		putative 5-dehydro-4-deoxyglucarate dehydratase EC:4.2.1.41, maybe involved in ascorbate and aldarate metabolism	1.62964	0.0117582	1.27016	0.0256705	Carbon source transport and metabolism
cg0537		putative transcriptional regulator, LysR-type	1.00447	0.429933	1.0099	0.369538	signal transduction mechanisms
cg0538		putative serine protease ClpP class	0.883611	0.2382	1.0738	0.0688539	Protein turnover and chaperones
cg0540		putative dicarboxylic acid hydrolase or metal-dependent amidohydrolase, TIM-barrel fold	1.87882	0.0562381	1.08571	0.126273	General function prediction only
cg0542		hypothetical protein	2.59405	0.107014	1.00242	0.443925	Unknown function
cg0543		hypothetical protein	3.1068	0.135246	0.880324	0.00498035	Unknown function
cg0544		putative membrane protein	0.582786	0.163317	1.03092	0.42257	Unknown function
cg0545	pitA	low-affinity phosphate transport protein, Pit-family	0.248342	0.00123606	1.03719	0.239157	Inorganic ion transport, metabolism, and storage
cg0548	menB (ech)	1,4-dihydroxy-2-naphthoate synthase (EC:4.1.3.36), involved in menaquinone biosynthesis, putative feruloyl-CoA/caffeoyl-CoA/p-coumaroyl-CoA hydratase/aldolase (EC:4.2.1.-)	0.877248	0.282412	0.954458	0.381133	Carbon source transport and metabolism
cg0549		putative pterin-4-α-carbinolamine dehydratase (EC:4.2.1.96)	1.19375	0.199671	0.846462	0.151239	General function prediction only
cg0550	pepE2	putative peptidase E (EC:3.4.13.21)	1.14358	0.200909	1.03425	0.0258222	Protein turnover and chaperones
cg0551	menC	O-succinylbenzoate synthase, involved in menaquinone biosynthesis	1.23785	0.178003	1.21608	0.00730747	Coenzyme transport and metabolism
cg0552	menD	2-oxoglutarate decarboxylase (EC:4.1.1.71) and 2-succinyl-6-hydroxy-2,4-cyclohexadiene-1-carboxylate synthase, , involved in menaquinone biosynthesis	1.00585	0.448335	1.05986	0.120022	Coenzyme transport and metabolism
cg0553		putative membrane protein, conserved	1.37978	0.0113795	1.05281	0.12801	Unknown function
cg0554	mgtA	α-mannosyltransferase add mannose to GlcAGroAc2	1.62738	0.101483	1.11152	0.167059	Cell wall/membrane/envelope biogenesis
cg0555		putative amino acid permease	1.89163	0.0305029	0.746338	0.0401632	Amino acid transport and metabolism
cg0556	menG (ubiE)	menaquinone biosynthesis methyltransferase (EC:2.1.1.-), dimethylmenaquinone methyltransferse, , involved in menaquinone biosynthesis	1.36132	0.043541	0.937178	0.270957	Coenzyme transport and metabolism
cg0557		putative monooxygenase, FAD-binding	1.03399	0.292213	1.08328	0.0727744	General function prediction only
cg0559	ispB	putative octaprenyl-diphosphate synthase protein (EC:2.5.1.-)	1.17141	0.354793	0.724584	0.0935295	Transport and metabolism of further metabolites
cg0561	secE	preprotein translocase subunit	0.880478	0.257201	0.877799	0.121383	Protein secretion
cg0562	nusG	transcription antitermination protein	1.9386	0.0351427	1.04344	0.186923	Transcription including sigma factors, RNA processing and modification
cg0563	rplK	50S ribosomal protein L11	0.808226	0.0862062	1.09417	0.143574	Translation, ribosomal structure and biogenesis
cg0564	rplA	50S ribosomal protein L1	0.865254	0.2682	1.11908	0.249605	Translation, ribosomal structure and biogenesis
cg0565	pwkR/gabR	putative transcriptional regulator, similar to purR of Bacillus subtilis that regulates purine catabolism	1.34854	0.27419	0.954951	0.215385	signal transduction mechanisms
cg0566	gabT	4-aminobutyrate aminotransferase, AT class II (EC:2.6.1.19)	0.818731	8.54872e-15	0.947023	0.317558	Carbon source transport and metabolism; Amino acid transport and metabolism; Transport and metabolism of further metabolites
cg0567	gabD2	putative succinate-semialdehyde dehydrogenase NADP+ (EC:1.2.1.16)	1.84868	0.0195156	0.780072	0.185315	Carbon source transport and metabolism; Amino acid transport and metabolism; Transport and metabolism of further metabolites
cg0568	gabP	GABA-specific uptake transporter	/	/	1.08215	0.147627	Carbon source transport and metabolism; Amino acid transport and metabolism; Transport and metabolism of further metabolites
cg0569		putative Cd2+/cation-transporting P-type ATPase (EC:3.6.3.3), maybe involved in folate or lipopolysaccharide biosynthesis, Starch and sucrose metabolism	0.553453	6.10623e-16	1.35379	0.0507623	Carbon source transport and metabolism; Inorganic ion transport, metabolism, and storage
cg0570		putative dehydrogenase	0.531383	0.180568	0.985454	0.496709	General function prediction only
cg0571		hypothetical protein	1.18376	0.157602	1.08934	0.219962	Unknown function
cg0572	rplJ	50S ribosomal protein L10	0.973595	0.497721	0.987724	0.482595	Translation, ribosomal structure and biogenesis
cg0573	rplL	50S ribosomal protein L7/L12	0.797712	0.21804	1.00797	0.0890729	Translation, ribosomal structure and biogenesis
cg0575		putative secreted protein	1.04298	0.283989	1.16197	0.186763	Unknown function
cg0576	rpoB	DNA-directed RNA polymerase β subunit (EC:2.7.7.6), essential	0.90516	0.409181	1.10587	0.234974	Transcription including sigma factors, RNA processing and modification
cg0577	rpoC	DNA-directed RNA polymerase β subunit (EC:2.7.7.6)	1.07972	0.290328	1.10559	0.311767	Transcription including sigma factors, RNA processing and modification
cg0578		putative membrane protein	/	/	1.08343		Unknown function
cg0579		putative transcriptional regulator, HTH_3-family	0.973522	0.491622	0.959393	0.203104	signal transduction mechanisms
cg0580		hypothetical protein, conserved	0.515347	0.022572	0.986647	0.499945	Unknown function
cg0581	rpsL	30S ribosomal protein S12	0.659841	0.0831887	0.87463	0.21218	Translation, ribosomal structure and biogenesis
cg0582	rpsG	30S ribosomal protein S7	0.467729	0.0460627	0.948292	0.321375	Translation, ribosomal structure and biogenesis
cg0583	fusA	elongation factor EF-2/G EC:3.6.5.3	1.13962	0.236403	1.11454	0.165344	Translation, ribosomal structure and biogenesis
cg0587	tuf	elongation factor Tu EC:3.6.5.3	0.780754	0.273686	1.16423	0.129654	Translation, ribosomal structure and biogenesis
cg0588		hypothetical protein	1.57333	0.0448064	1.02234	0.38721	Unknown function
cg0589		putative siderophore ABC transporter, ATP-binding protein	1.56793	0.0839966	1.01084	0.442268	Inorganic ion transport, metabolism, and storage; Transport and metabolism of further metabolites
cg0590		putative siderophore ABC transporter, permease protein	5.66861	0.01554	0.946184	0.300888	Inorganic ion transport, metabolism, and storage; Transport and metabolism of further metabolites
cg0591		putative siderophore ABC transporter, permease protein	3.35141	0.057456	0.941699	0.373224	Inorganic ion transport, metabolism, and storage; Transport and metabolism of further metabolites
cg0592		putative butyryl-CoA:acetate coenzyme A transferase (EC:2.8.3.8), maybe involved in butanoate or propanoate metabolism	1.92337	0.0120164	0.689788	0.081518	Carbon source transport and metabolism
cg0593	rpsJ	30S ribosomal protein S10	0.448101	0.0610022	0.981048	0.478464	Translation, ribosomal structure and biogenesis
cg0594	rplC	50S ribosomal protein L3	0.677236	0.0739173	1.03272	0.390872	Translation, ribosomal structure and biogenesis
cg0596	rplD	50S ribosomal protein L4	0.764365	0.280415	1.04995	0.298771	Translation, ribosomal structure and biogenesis
cg0597	rplW	50S ribosomal protein L23	0.38155	0.0709203	1.02087	0.388036	Translation, ribosomal structure and biogenesis
cg0598	rplB	50S ribosomal protein L2	0.748211	0.266987	1.08932	0.217539	Translation, ribosomal structure and biogenesis
cg0599	rpsS	30S ribosomal protein S19	0.514273	0.0466309	1.06475	0.300341	Translation, ribosomal structure and biogenesis
cg0600	rplV	50S ribosomal protein L22	0.533313	0.0620547	1.10768	0.237038	Translation, ribosomal structure and biogenesis
cg0601	rpsC	30S ribosomal protein S3	0.707959	0.0564252	1.07058	0.259787	Translation, ribosomal structure and biogenesis
cg0602	rplP	50S ribosomal protein L16	0.766855	0.0435342	1.12931	0.10478	Translation, ribosomal structure and biogenesis
cg0603	rpmC	50S ribosomal protein L29	0.740299	0.17141	1.10588	0.192588	Translation, ribosomal structure and biogenesis
cg0604	rpsQ	30S ribosomal protein S17	0.641244	0.250483	1.14189	0.18851	Translation, ribosomal structure and biogenesis
cg0606		putative membrane protein	2.4488	0.00738053	1.02607	0.232121	Unknown function
cg0607		putative secreted protein	3.17511	0.017966	1.00729	0.368471	Unknown function
cg0608	rplN	50S ribosomal protein L14	0.684485	0.161859	1.06858	0.293556	Translation, ribosomal structure and biogenesis
cg0609	rplX	50S ribosomal protein L24	1.05771	0.415388	1.04035	0.343251	Translation, ribosomal structure and biogenesis
cg0610	rplE	50S ribosomal protein L5	1.67993	0.271531	1.04927	0.357769	Translation, ribosomal structure and biogenesis
cg0611		putative secreted protein	0.874234	0.171966	1.32117	0.00192536	Unknown function
cg0612	dkg	2,5-diketo-D-gluconic acid reductase, related to diketogulonate reductase EC:1.1.1.-	2.24096	0.0188503	0.991051	0.46334	Transport and metabolism of further metabolites
cg0614		hypothetical protein	1.22729	0.212019	0.973841	0.4223	Unknown function
cg0616	fdhD	formate dehydrogenase accessory protein	2.64896	0.0128985	0.931992	0.0399187	Carbon source transport and metabolism
cg0617		putative molybdopterin-guanine dinucleotide biosynthesis protein, required for FDH (cg0618) activity	1.70646	0.0119337	0.946334	0.207545	Carbon source transport and metabolism
cg0618	fdhF	formate dehydrogenase, molybdenum-dependent enzyme	1.42835	0.0416534	0.954655	0.287978	Carbon source transport and metabolism
cg0620		putative secreted protein	0.0560786	0.066515	1.52263	0.030787	Unknown function
cg0621	cbrT	putative cobalamin ECF transporter, substrate-specific component SCO2325	0.200897	0.00631747	1.10898	0.042884	Coenzyme transport and metabolism
cg0622	cbrU	putative cobalamin ECF transporter, duplicated ATPase component SCO2324 of energizing module	0.206869	0.00537928	1.03211	0.228569	Coenzyme transport and metabolism
cg0623	cbrV	putative cobalamin ECF transporter, transmembrane component SCO2323 of energizing module	0.118141	0.0187069	1.09513	0.16875	Coenzyme transport and metabolism
cg0624		putative secreted oxidoreductase	0.162633	0.00926185	1.16977	0.158096	General function prediction only
cg0625		putative secreted protein	0.315739	0.00281082	0.921115	0.15852	Unknown function
cg0627		putative acetyltransferase, GNAT-family	1.56394	0.0161566	0.737722	0.0315151	General function prediction only
cg0628	rpsH	30S ribosomal protein S8	0.605851	0.0885788	1.12509	0.150586	Translation, ribosomal structure and biogenesis
cg0629	rplF	50S ribosomal protein L6	0.473661	0.0489465	1.11678	0.249381	Translation, ribosomal structure and biogenesis
cg0630	rplR	50S ribosomal protein L18	0.375227	0.0629097	1.19932	0.152367	Translation, ribosomal structure and biogenesis
cg0631	rpsE	30S ribosomal protein S5	0.415828	0.0100698	1.14572	0.21756	Translation, ribosomal structure and biogenesis
cg0632	rpmD	50S ribosomal protein L30	0.35135	0.0197819	1.21553	0.164233	Translation, ribosomal structure and biogenesis
cg0634	rplO	50S ribosomal protein L15	0.270929		1.92038	0.182218	Translation, ribosomal structure and biogenesis
cg0635	creA	putative NAD+-dependent 4-hydroxybenzaldehyd dehydrogenase subunit (EC: 1.2.1.64), (N. Kallscheuer: why only 107 aa; too short)	0.244099	0.20045	0.808427	0.0626893	General function prediction only
cg0636	creB	putative membrane protein	0.108309	0.00482203	0.673166	0.0151124	Unknown function
cg0637	creC (betB)	putative NAD+-dependent 4-hydroxybenzaldehyd dehydrogenase subunit (EC: 1.2.1.64 ) (before BetB: putative βine aldehyde dehydrogenase BADH oxidoreductase (EC:1.2.1.8))	1.31057	0.122573	1.00838	0.382	Carbon source transport and metabolism
cg0638	creD	p-cresol methylhydroxylase subunit, N.Kallscheuer: contains putative phosphohydrolase domain, maybe responsible for cleavage of phophorylated intermediate	1.19308	0.125984	0.989405	0.489231	Carbon source transport and metabolism
cg0639	creE	ferredoxin reductase, part of putative cytochrome P450 system of p-cresol methylhydroxylase	1.02542	0.267622	1.07553	0.251918	Carbon source transport and metabolism
cg0640	creF (fdxB)	ferredoxin no. 2, 2Fe-2S, part of putative cytochrome P450 system of p-cresol methylhydroxylase	0.69776	0.19506	1.13951	0.181784	Carbon source transport and metabolism
cg0641	creG (fabG2)	4-hydroxybenzyl-alcohol dehydrogenase (EC: 1.17.99.1)	1.02909	4.03908e-25	1.21594	0.170828	Carbon source transport and metabolism
cg0642	creH	putative PEP-utilizing enzyme, probably DNA binding, conserved	0.470902	4.44089e-16	1.15511	0.144542	Carbon source transport and metabolism
cg0644	creI	putative pyruvate phosphate dikinase, PEP/pyruvate binding, N. Kallscheuer: maybe phophorylated 4-hydroxybenzyl-alcohol as intermediate? PEP as PO43--donor?	0.303986	0.0368974	1.07521	0.312435	Carbon source transport and metabolism
cg0645	creJ (cytP)	cytochrome P450 (EC:1.14.15.1), part of putative cytochrome P450 system of p-cresol methylhydroxylase	0.114898	0.0174204	0.772336	0.0341589	Carbon source transport and metabolism
cg0646	creR	putative transcriptional regulator, IclR-family, maybe involved in regulation of cre-operon	0.432049	0.119924	1.02407	0.335364	signal transduction mechanisms
cg0647	secY	preprotein translocase subunit	1.16983	0.125852	1.00863	0.275477	Protein secretion
cg0648	adk	adenylate kinase (EC:2.7.4.3)	0.504824	0.101204	1.00252	0.463935	Nucleotide transport and metabolism
cg0649	map1	methionine aminopeptidase (EC:3.4.11.18)	1.4018	0.166084	1.06137	0.210411	Protein turnover and chaperones
cg0650		putative secreted protein	0.396846	0.0581822	1.19208	0.0635022	Unknown function
cg0651	infA	translation initiation factor IF-1	0.612788	0.0220071	1.04745	0.292579	Translation, ribosomal structure and biogenesis
cg0652	rpsM	30S ribosomal protein S13	0.558825	0.044906	1.08961	0.222533	Translation, ribosomal structure and biogenesis
cg0653	rpsK	30S ribosomal protein S11	0.893264	0.016923	1.10708	0.216996	Translation, ribosomal structure and biogenesis
cg0654	rpsD	30S ribosomal protein S4	0.689275	0.0958171	1.05554	0.317182	Translation, ribosomal structure and biogenesis
cg0655	rpoA	DNA-directed RNA polymerase α subunit (EC:2.7.7.6), essential	0.465931	0.0527061	1.09721	0.276714	Transcription including sigma factors, RNA processing and modification
cg0656	rplQ	50S ribosomal protein L17	0.832412	0.313923	1.08642	0.26809	Translation, ribosomal structure and biogenesis
cg0657	truA	tRNA pseudouridine synthase A (EC:4.2.1.70)	1.17665	0.198992	1.01522	0.298076	Transcription including sigma factors, RNA processing and modification
cg0658	rptA	terminal Rhamnopyranosyltransferase	1.0106	0.275635	1.15534	0.0138221	Cell wall/membrane/envelope biogenesis
cg0659		putative acetyltransferase, GNAT-family	1.13124	0.132515	1.06639	0.0591496	General function prediction only
cg0660		hypothetical protein	0.701834	0.336028	0.837339	0.110259	Unknown function
cg0661		hypothetical protein, conserved	/	/	2.42464		Unknown function
cg0662		putative FAD/FMN-containing dehydrogenase, conserved	4.13109	0.00696657	1.09795	0.0188681	General function prediction only
cg0663	cma	cyclopropane-fatty-acyl-phospholipid syntase	2.47419	0.00400784	1.03028	0.0599832	Cell wall/membrane/envelope biogenesis
cg0664		putative membrane protein	2.22407	0.0225	0.913459	0.347608	Unknown function
cg0665		putative serine protease	/	/	2.50658		General function prediction only
cg0666		putative membrane protein	2.22944		1.18774	0.0808817	Unknown function
cg0669		hypothetical protein, conserved	1.52246	0.0604057	0.487183		Unknown function
cg0672		hypothetical protein, conserved	1.14816	0.222597	0.967568	0.43752	Unknown function
cg0673	rplM	50S ribosomal protein L13	0.755749	0.181538	1.09187	0.174542	Translation, ribosomal structure and biogenesis
cg0674	rpsI	30S ribosomal protein S9	0.489292	0.103054	1.07771	0.246323	Translation, ribosomal structure and biogenesis
cg0675	mrsA	phosphoglucosamine mutase (EC:5.4.2.8)	1.26715	0.148397	1.1759	0.0633245	Cell wall/membrane/envelope biogenesis
cg0676		hypothetical protein, conserved	2.65064	0.0246189	1.10366	0.167488	Unknown function
cg0678		hypothetical protein, conserved	0.664348	0.121425	1.31245	0.0119008	Unknown function
cg0679		hypothetical protein, conserved	1.09433	0.379489	0.984109	0.495282	Unknown function
cg0680		hypothetical protein, conserved	0.921308	0.325573	1.19629	0.0410282	Unknown function
cg0681	alr	alanine racemase (EC:5.1.1.1), deletion causes d-alanine auxotrophy	0.759724	0.371952	0.948721	0.0773009	Amino acid transport and metabolism; Cell wall/membrane/envelope biogenesis
cg0682		putative ATPase or kinase, P-loop hydrolase, UPF0079-family	1.11843	0.278074	1.13631	0.055078	General function prediction only
cg0683		putative permease	0.91766	0.405709	1.34622	0.0244821	General function prediction only
cg0684	papA	prolyl aminopeptidase A (EC: 3.4.11.5)	2.0881	0.00417665	1.14842	0.0817651	Protein turnover and chaperones
cg0685		putative molecular chaperone, homolog of metal-dependent protease	3.93658	0.0507855	1.06481	0.104126	Protein turnover and chaperones
cg0686		putative acetyltransferase, GNAT-family	1.71122	0.000649955	1.05984	0.0506642	General function prediction only
cg0687	gcp	putative O-sialoglycoprotein endopeptidase (EC:3.4.24.57)	2.12334	0.0199297	1.18074	0.0754827	Carbon source transport and metabolism; Amino acid transport and metabolism
cg0688		putative protein, conserved, UPF0031-family	0.390488	0.0287475	1.02305	0.376178	Unknown function
cg0689		hypothetical protein	0.404666	0.0357723	1.09946	0.290098	Unknown function
cg0690	groES	chaperonin 10 Kd subunit	4.7554	0.0627126	1.11699	0.0064817	Protein turnover and chaperones
cg0691	groEL	60 KDA chaperonin, (protein CPN60 HSP60-) N-terminal fragment, putative pseudogene	4.24473	0.033898	1.05533	0.307046	Protein turnover and chaperones
cg0692	tnp1c	transposase	0.499537	0.101405	0.814211	0.0435908	DNA replication, recombination, repair, and degradation
cg0693	groEL	60 KDA chaperonin, (protein CPN60 GroEl) C-terminal fragment, putative pseudogene	2.158	0.0328177	1.16567	0.174616	Protein turnover and chaperones
cg0696	sigD	RNA polymerase σ70 factor, ECF-family	1.60775	0.025577	0.672506	0.00545212	Transcription including sigma factors, RNA processing and modification
cg0697		hypothetical protein, conserved	3.4691	0.0391814	0.840257	0.304211	Unknown function
cg0698		hypothetical protein, conserved	0.842422	0.178765	1.09008	0.00310914	Unknown function
cg0699	guaB2	inositol-5-monophosphate dehydrogenase no. 2 (EC:1.1.1.205), essential for sugar uptake	1.29604	0.27566	1.06752	0.146474	Carbon source transport and metabolism
cg0700	guaB3	inositol-5-monophosphate dehydrogenase no. 3	1.25653	0.0880959	0.931032	0.179699	Carbon source transport and metabolism
cg0701		putative drug/metabolite transporter DMT superfamily	0.47723	0.212981	0.873412	0.321716	Amino acid transport and metabolism
cg0702		LysR-family regulator, activates cg0701 in response to serine	1.0037	0.472066	0.843005	0.074511	signal transduction mechanisms
cg0703	guaA	bifunctional GMP synthase/glutamine amidotransferase protein EC:6.3.5.2	0.909265	0.275104	1.11737	0.164261	Nucleotide transport and metabolism
cg0704		hypothetical protein, conserved	1.38248	0.04467	1.22811	0.000193296	Unknown function
cg0705		hypothetical protein	0.760541	0.288339	1.09732	0.103716	Unknown function
cg0706		putative membrane protein, conserved	1.01223	0.41634	0.856962	0.0687282	Unknown function
cg0707	cgtS7	two component sensor kinase	1.82807	0.0926527	1.01135	0.392839	Post-translational modification; Signal transduction mechanisms
cg0709	cgtR7	two component response regulator	2.00843	0.119066	0.957929	0.0920085	Signal transduction mechanisms
cg0710		putative membrane protein	0.599155	0.100449	0.978931	0.471229	Unknown function
cg0711		putative membrane protein	0.430233	0.0200429	1.02827	0.163515	Unknown function
cg0712		putative secreted protein	0.537096	0.00245378	1.11069	0.132539	Unknown function
cg0713		hypothetical protein, conserved	9.60137	0.00809827	1.0986	0.301358	Unknown function
cg0714		putative polymerase involved in DNA repair	3.55617	0.00758226	1.07248	0.204418	DNA replication, recombination, repair, and degradation
cg0715		putative secreted protein	0.565284	0.0540991	1.17791	0.0281111	Unknown function
cg0716		hypothetical protein, conserved	1.7786	0.022497	1.12558	0.0260133	Unknown function
cg0717	crtEb (ubiA)	putative lycopene elongase or prenyltransferase, terpenoid synthesis	0.691142	0.0361133	1.05486	0.287458	Transport and metabolism of further metabolites
cg0718	crtYf	C50 carotenoid ε cyclase, terpenoid synthesis	0.378529	0.00235146	1.04977	0.30956	Transport and metabolism of further metabolites
cg0719	crtYe	C50 carotenoid ε cyclase, terpenoid synthesis	0.386795	0.0270162	1.09477	0.169776	Transport and metabolism of further metabolites
cg0720	crtI	phytoene dehydrogenase desaturase (EC:1.3.99.-), terpenoid synthesis	0.318092	0.0508779	1.17046	0.0840713	Transport and metabolism of further metabolites
cg0721	crtB	phytoene synthetase (EC:2.5.1.-), terpenoid synthesis	0.351405	0.00162015	1.27415	0.0181928	Transport and metabolism of further metabolites
cg0722		putative drug exporter, RND superfamily, terpenoid synthesis	0.309715	0.00526856	1.3253	0.00747534	Transport and metabolism of further metabolites
cg0723	crtE	geranylgeranyl-pyrophosphate sythase (EC:2.5.1.29), terpenoid synthesis	0.178166	0.0218007	1.25062	0.0498899	Transport and metabolism of further metabolites
cg0725		putative transcriptional regulator, MarR-family, deletion published,maybe involved in the regulation of carotinoid biosynthesis	0.948639	0.468568	1.11702	0.110654	signal transduction mechanisms
cg0726		putative secreted lipoprotein	0.398548	0.0177139	1.33994	0.0296536	Unknown function
cg0727		putative nucleoside-diphosphate-sugar epimerase	4.33608	0.0135056	0.992761	0.474009	Nucleotide transport and metabolism
cg0728	phr	deoxyribodipyrimidine photolyase (EC:4.1.99.3)	1.70627	0.119514	0.831592	0.0738356	DNA replication, recombination, repair, and degradation
cg0730		putative glycosyl transferase	1.6349	0.0469796	0.904891	0.115889	General function prediction only
cg0732		putative ABC transport system integral membrane subunit	1.75588	0.254275	0.863337	0.0914411	General function prediction only
cg0733		putative ABC transporter ATP-binding protein	1.1158	0.073433	0.856577	0.110059	General function prediction only
cg0735	metI	high affinity ABC-type methionine transporter, permease subunit (TC 3.A.1.24.1),	1.60738	0.0857963	1.19621	0.0933426	Amino acid transport and metabolism
cg0736	metN	high affinity ABC-type methionine transporter, ATPase subunit (TC 3.A.1.24.1)	1.00136	0.25762	0.994892	0.466195	Amino acid transport and metabolism
cg0737	metQ	high affinity ABC-type methionine transporter,substrate-binding lipoprotein (TC 3.A.1.24.1)	1.91809	0.183351	0.949855	0.303669	Amino acid transport and metabolism
cg0738	dnaE2	DNA polymerase III subunit α (EC:2.7.7.7)	5.085	0.016687	0.912972	0.114952	DNA replication, recombination, repair, and degradation
cg0739		putative integral membrane protein	2.28369	0.0840939	0.948369	0.367305	Unknown function
cg0740		putative membrane protein	1.40908	0.00856858	1.15086	0.00678817	Unknown function
cg0741	mntR	Manganese dependent repressor of cg1623 (putative manganese transporter), DtxR-family	0.955959	0.46025	0.923301	0.0357984	signal transduction mechanisms
cg0742		putative integral membrane protein	3.92983	0.00166589	0.851801	0.281932	Unknown function
cg0745		putative NAD-dependent deacetylase, SIR2-family	0.732293	0.0616306	1.26608	0.075177	General function prediction only
cg0747		putative cytidine and deoxycytidylate deaminase, conserved	0.901233	0.421144	1.1941	0.0760903	Nucleotide transport and metabolism
cg0748		putative ABC-type putative iron-siderophore transporter, substrate-binding lipoprotein	1.48716	0.165891	1.07429	0.01894	Inorganic ion transport, metabolism, and storage; Transport and metabolism of further metabolites
cg0749	spoU	putative tRNA/rRNA methyltransferase protein (EC:2.1.1.-)	0.820077	9.32587e-15	1.14083	0.195692	Translation, ribosomal structure and biogenesis
cg0750	folD	methylenetetrahydrofolate dehydrogenase, NADP+/methenyltetrahydrofolate cyclohydrolase (EC:3.5.4.9;1.5.1.5), can be replaced by fhs	0.63321	0.0889614	1.07846	0.122715	Coenzyme transport and metabolism
cg0751		putative membrane protein	0.301276	0.120884	1.17444	0.0733541	Unknown function
cg0752		putative secreted or membrane protein	0.777972	0.244212	0.703805	0.0167827	Unknown function
cg0753		putative secreted protein	4.72914	0.00238966	0.925709	0.0537961	Unknown function
cg0754	metA (metX)	homoserine O-acetyltransferase EC:2.3.1.31, loss causes methionine auxotrophy	1.454	0.0284156	0.828693	0.0775435	Amino acid transport and metabolism
cg0755	metY	O-acetylhomoserine sulfhydrylase EC:2.5.1.49, loss causes methionine auxotrophy	0.717689	0.00303407	0.885177	0.104542	Amino acid transport and metabolism
cg0756	cstA	carbon starvation protein A	0.198378	0.000502594	0.626972	0.0263324	General function prediction only
cg0757		hypothetical protein, conserved	0.274922	0.044832	0.741538	0.267638	Unknown function
cg0758		hypothetical protein	0.859105	0.340078	1.08857	0.301385	Unknown function
cg0759	prpD2	2-methycitrate dehydratase, involved in propionate catabolism EC:4.2.1.79	0.0795448	0.00256866	0.809574	0.104056	Carbon source transport and metabolism
cg0760	prpB2	2-methylisocitrate lyase, involved in propionate catabolism EC:4.1.3.30	0.116837	0.00205637	0.824596	0.097089	Carbon source transport and metabolism
cg0762	prpC2	2-methylcitrate synthase, involved in propionate catabolism EC:2.3.3.5,2.3.3.1	0.148549	0.0395825	0.745345	0.00453882	Carbon source transport and metabolism
cg0763	mdh2 (mdhB)	predicted malate/L-lactate dehydrogenase EC:1.1.1.37	4.5039	0.057097	0.958758	0.35345	General function prediction only
cg0764		putative transcriptional regulator, GntR-family, binds to the ramA promoter	0.508006	0.014714	0.946003	0.242215	signal transduction mechanisms
cg0765		putative secreted protein	2.88565	0.0275361	0.845025	0.0265188	Unknown function
cg0766	icd	isocitrate dehydrogenase (EC:1.1.1.42)	0.337679	0.0872404	1.09322	0.129826	Central carbon metabolism
cg0767		putative cytoplasmic siderophore-interacting protein	1.73355	0.00449592	0.918531	0.330185	Inorganic ion transport, metabolism, and storage; Transport and metabolism of further metabolites
cg0768		putative iron-siderophore ABC transporter, ATP-binding protein	2.23377	0.0230439	0.74112	0.000175383	Inorganic ion transport, metabolism, and storage; Transport and metabolism of further metabolites
cg0769		putative iron-siderophore ABC transporter, permease subunit	1.5651	0.0782245	0.753953	0.0164369	Inorganic ion transport, metabolism, and storage; Transport and metabolism of further metabolites
cg0770		putative iron-siderophore ABC transporter, permease subunit	2.61596	0.000353884	0.88586	0.182041	Inorganic ion transport, metabolism, and storage; Transport and metabolism of further metabolites
cg0771	irp1	putative iron-siderophore ABC transporter, secreted siderophore-binding lipoprotein	3.3855	0.000965721	0.914785	0.254053	Inorganic ion transport, metabolism, and storage; Transport and metabolism of further metabolites
cg0772		putative sugar efflux permease, MFS-type	2.53373	0.0147026	0.993914	0.435938	Carbon source transport and metabolism
cg0773		putative exodeoxyribonuclease (EC:3.1.11.2)	1.35051	0.13306	0.848131	0.203712	DNA replication, recombination, repair, and degradation
cg0774		putative membrane protein	1.19307	0.26446	1.26827	0.0109809	Unknown function
cg0775		hypothetical protein	0.543844	0.102928	0.988081	0.49364	Unknown function
cg0776		putative ABC-type iron-siderophore transporter, substrate-binding lipoprotein	0.330862	0.0708062	0.884198	0.105552	Inorganic ion transport, metabolism, and storage; Transport and metabolism of further metabolites
cg0777		putative ABC-type iron-siderophore transporter, ATPase subunit	0.186514	0.0114127	0.786619	0.0898529	Inorganic ion transport, metabolism, and storage; Transport and metabolism of further metabolites
cg0778		putative ABC-type iron-siderophore transporter, permease subunit	0.713243	0.17109	0.714331	0.0814943	Inorganic ion transport, metabolism, and storage; Transport and metabolism of further metabolites
cg0779	trpS	tryptophanyl-tRNA synthetase (EC:6.1.1.2)	1.03652	0.203528	0.955014	0.27316	Translation, ribosomal structure and biogenesis
cg0780		putative membrane protein, ribonuclease BN-like-family	0.719992	0.0602521	1.12964	0.07858	General function prediction only
cg0781		putative membrane protein	1.29837	0.317083	1.24265	0.1704	Unknown function
cg0782	pbp4 (dac)	D-alanyl-D-alanine carboxypeptidase (EC:3.4.16.4)	2.03578	0.0105341	0.991378	0.465131	Cell wall/membrane/envelope biogenesis
cg0783		hypothetical protein, conserved	1.60714	0.1867	0.619702	0.0589725	Unknown function
cg0784		putative cell wall-associated hydrolase	3.88084	0.226923	0.934657	0.318541	Cell wall/membrane/envelope biogenesis
cg0785		hypothetical protein	2.08123	0.0152093	0.870938	0.304738	Unknown function
cg0786	upp	uracil phosphoribosyltransferase (EC:2.4.2.9)	1.5827	0.23855	0.93352	0.28944	Nucleotide transport and metabolism
cg0787		putative transcriptional regulator, HTH_3-family	0.885051	0.199835	0.954018	0.177476	signal transduction mechanisms
cg0788	pmmB	phosphoglucomutase/phosphomannomutase EC:5.4.2.2,5.4.2.8	1.9962	6.23878e-06	1.23744	0.0087581	Carbon source transport and metabolism
cg0789	amiA	putative N-acyl-L-amino acid amidohydrolase	0.551239	0.135463	0.866997	0.066996	Amino acid transport and metabolism; Transport and metabolism of further metabolites
cg0790	lpdA	dihydrolipoamide dehydrogenase, E3 subunit of PDHc/ODHc EC:1.8.1.4	1.58056	0.0302142	0.991477	0.46725	Central carbon metabolism
cg0791	pyc	pyruvate carboxylase (EC:6.4.1.1)	0.163836	0.00276133	1.19801	0.0573729	Central carbon metabolism
cg0792		putative thioredoxin domain-containing protein	0.554182	0.0437392	1.20283	0.057834	Unknown function
cg0793		putative secreted protein	0.286366	0.0513979	0.987471	0.495483	Unknown function
cg0794	yciC	putative P-loop GTPase of the COG0523-family, involved in zinc metabolism	0.915501	7.09433e-14	0.915866	0.311667	Inorganic ion transport, metabolism, and storage
cg0795		putative FAD-dependent pyridine nucleotide-disulphide oxidoreductase, involved in zinc metabolism	3.61813	0.215524	1.22445	0.158139	Inorganic ion transport, metabolism, and storage
cg0796	prpD1	2-methylcitrate dehydratase	3.29728	0.0407787	0.977286	0.462243	Carbon source transport and metabolism
cg0797	prpB1	2-methylisocitrate lyase	3.46072	0.0766578	1.21835	0.0360052	Carbon source transport and metabolism
cg0798	prpC1	2-methylcitrate synthase	1.34561	0.222175	1.22024	0.0621249	Carbon source transport and metabolism
cg0799		hypothetical protein, conserved	1.18694	0.217107	0.932821	0.291166	Unknown function
cg0800	prpR	transcriptional activator of propionate catabolism, MerR/HTH_3-family	1.0213	0.393258	0.882396	0.0891342	signal transduction mechanisms
cg0801		hypothetical protein	1.05346	0.290104	0.783681	0.0687774	Unknown function
cg0802	accBC	biotin carboxylase and biotin carboxyl carrier protein EC:6.3.4.14,6.4.1.2,6.4	0.7044	0.0714154	1.22465	0.0870618	Lipid transport and metabolism
cg0803	thtR	thiosulfate sulfurtransferase (EC:2.8.1.1)	0.610359	0.0523989	1.15946	0.072559	Inorganic ion transport, metabolism, and storage
cg0806		hypothetical protein, conserved	1.43597	0.0107659	1.08269	0.120058	Unknown function
cg0807		hypothetical protein, conserved	1.40478	0.144172	1.07481	0.142988	Unknown function
cg0808	wbpC	putative lipopolysaccharide biosynthesis acyltransferase, conserved	0.464499	0.0259502	1.10267	0.131828	Cell wall/membrane/envelope biogenesis
cg0809	maf	putative septum formation protein Maf-like protein	0.951529	0.413166	1.06255	0.194532	Cell division, chromosome partitioning
cg0810	accE	ε-peptide of acetyl-CoA carboxylase, conserved	0.935067	0.345316	1.16453	0.107742	Lipid transport and metabolism
cg0811	dtsR2 (accD2)	acetyl/propionyl CoA carboxylase, β chain (EC:6.4.1.3,6.3.1.3), mycolic acid biosythesis	1.16392	0.0796069	0.955397	0.409059	Cell wall/membrane/envelope biogenesis
cg0812	dtsR1 (accD1)	acetyl/propionyl-CoA carboxylase, β chain (EC:6.4.1.2,6.4.1.3) mycolic acid biosythesis	3.20465	0.0312091	0.956016	0.322429	Cell wall/membrane/envelope biogenesis
cg0814	birA	biotin-protein ligase	5.98482	0.0886777	0.971201	0.445998	Coenzyme transport and metabolism
cg0815		putative membrane protein	5.751	0.0627782	0.970578	0.45031	Unknown function
cg0816	purK	phosphoribosylaminoimidazole carboxylase	0.800128	0.0951403	0.906827	0.251158	Nucleotide transport and metabolism
cg0817	kup	potassium K+ transporter	1.03794	0.369869	1.08095	0.129268	Inorganic ion transport, metabolism, and storage
cg0819		hypothetical protein	1.02987	0.179621	0.892411	0.0419318	Unknown function
cg0820	purE	phosphoribosylaminoimidazole carboxylase catalytic subunit	0.846281	0.106276	1.02489	0.183775	Nucleotide transport and metabolism
cg0821		hypothetical protein, conserved	0.747162	0.0652492	1.04646	0.0717628	Unknown function
cg0822		hypothetical protein, conserved	1.19338	0.0496868	1.05116	0.148475	Unknown function
cg0823	ntaA	nitrilotriacetate monooxygenase component A (EC:1.14.13.-)	0.207672	1.11022e-16	1.24438	0.183625	Transport and metabolism of further metabolites
cg0824	tnp5a	transposase	0.885984	0.231519	1.15449	0.0232602	DNA replication, recombination, repair, and degradation
cg0825	fabG	3-ketoacyl-acyl-carrier-protein reductase	0.433541	0.0169779	1.21423	0.0117567	Lipid transport and metabolism
cg0826		putative membrane protein	1.05347	0.372176	0.952756	0.400038	Unknown function
cg0828		putative dihydrofolate reductase	1.52937	0.0706978	1.04237	0.206293	Coenzyme transport and metabolism
cg0829		putative lactoylglutathione lyase or related lyase, glyoxylase-family, conserved	1.84907	0.0250903	1.07132	0.312464	General function prediction only
cg0830		putative membrane protein	0.438581	0.0185663	0.929857	0.366518	Unknown function
cg0831	tusG	trehalose uptake system, ABC-type, permease protein	0.399724	0.00256205	0.915287	0.135979	Carbon source transport and metabolism
cg0832	tusF	trehalose uptake system, ABC-type, membrane spanning protein	0.241741	0.0240334	0.806509	0.0343132	Carbon source transport and metabolism
cg0833		putative membrane protein, involved in trehalose uptake, conserved	0.313415	0.00969659	1.01778	0.428045	Carbon source transport and metabolism
cg0834	tusE	trehalose uptake system, ABC-type, bacterial extracellular solute-binding protein	0.604905	0.255723	0.969553	0.445884	Carbon source transport and metabolism
cg0835	tusK (msiK2)	trehalose uptake system, ABC-type, component	0.690081	0.0252309	0.912132	0.00117312	Carbon source transport and metabolism
cg0836		hypothetical protein	2.23585	0.225697	0.783459	0.228494	Unknown function
cg0837		hypothetical protein	1.48589	0.0302066	0.820177	0.272764	Unknown function
cg0838		putative helicase	2.09778	0.0342463	0.895574	0.0726788	DNA replication, recombination, repair, and degradation
cg0839		hypothetical protein	1.50065	0.119424	0.908449	0.272167	Unknown function
cg0840		hypothetical protein, conserved	1.38401	0.0163609	1.10263	0.255909	Unknown function
cg0841		hypothetical protein, conserved	1.52491	0.0919293	1.07558	0.135196	Unknown function
cg0842		putative DNA helicase	0.325914	0.013649	1.03906	0.131798	DNA replication, recombination, repair, and degradation
cg0843		putative helicase	1.18047	0.440299	0.897869	0.038178	DNA replication, recombination, repair, and degradation
cg0844		putative type II restriction enzyme, methylase subunit	0.310693	0.00629495	0.957141	0.236209	DNA replication, recombination, repair, and degradation
cg0845		putative superfamily II DNA/RNA helicase, SNF2-family	0.339915	0.020103	0.847085	0.0822039	DNA replication, recombination, repair, and degradation
cg0847	lcpA	transfers arabinogalactan onto peptidoglycan during cell wall biogenesis	1.0136	0.299046	0.762214	0.00439882	Cell wall/membrane/envelope biogenesis
cg0848	wbbL	putative rhamnosyl transferase WbbL	1.46784	0.0120364	0.765263	0.142263	Cell wall/membrane/envelope biogenesis
cg0849	manC (rmlA2)	GDP-mannose pyrophosphorylase, mannose-1-phosphate guanylyltransferase GDP EC:2.7.7.22	3.12862	0.0972838	0.973822	0.449846	Cell wall/membrane/envelope biogenesis
cg0850	whcD (whiB2)	trancriptional regulator, whiB homolog, involved in the early stages of cell division and fatty acid synthesis.	1.09312	0.267211	0.966577	0.435938	signal transduction mechanisms
cg0851		hypothetical protein	1.07628	0.0293979	0.835996	0.196406	Unknown function
cg0852		hypothetical protein, conserved	1.06767	0.441122	0.835566	0.0959457	Unknown function
cg0853		hypothetical protein, conserved	0.662113	0.201029	0.941843	0.340122	Unknown function
cg0854	manB (pmmA)	phosphomannomutase EC:5.4.2.8	1.77638	0.0964359	1.13965	0.0650754	Carbon source transport and metabolism
cg0855		hypothetical protein, conserved	1.01094	0.410136	0.964947	0.379919	Unknown function
cg0856	manA	mannose-6-phosphate isomerase (EC:5.3.1.8)	0.688687	0.0132102	0.864716	0.0477811	Carbon source transport and metabolism
cg0858		putative secreted protein	2.04976	0.00787876	0.841979	0.107051	Unknown function
cg0859		hypothetical protein, conserved	0.91018	0.351463	1.19754	0.0535463	Unknown function
cg0860	sahH	S-adenosyl-L-homocysteine hydrolase, Adenosylhomocysteinase EC:3.3.1.1, maybe involved in methionine synthesis; loss causes severe growth defects	0.851121	0.244956	0.962081	0.296001	Amino acid transport and metabolism
cg0861	tmk	thymidylate kinase (EC:2.7.4.9)	1.24412	0.218158	1.19589	0.0256283	Nucleotide transport and metabolism
cg0862	mtrA	two component response regulator involved in cell wall metabolism, stress response and osmoregulation	1.63424	0.0315571	1.10976	0.0514428	Signal transduction mechanisms; Cell wall/membrane/envelope biogenesis
cg0864	mtrB	two component sensor kinase involved in cell wall metabolism, stress response and osmoregulation	1.23803	0.183582	1.07219	0.00553076	Signal transduction mechanisms; Cell wall/membrane/envelope biogenesis
cg0865		putative secreted lipoprotein	0.90684	0.375324	1.0153	0.366553	Unknown function
cg0866		putative purine/pyrimidine phosphoribosyl transferase, conserved	0.790976	4.996e-15	1.06936	0.0590193	Nucleotide transport and metabolism
cg0867	psrp-1	putative ribosome-associated protein Y	0.791525	0.161332	1.22139	0.169079	Translation, ribosomal structure and biogenesis
cg0868	secA1	preprotein translocase, essential	1.29283	0.221403	0.914078	0.313918	Protein secretion
cg0869		hypothetical protein	3.51944	0.204771	0.879729	0.322191	Unknown function
cg0870		putative haloacid dehalogenase/epoxide hydrolase-family	1.45562	0.176238	0.822701	0.0173832	General function prediction only
cg0871		hypothetical protein, conserved	0.840675	0.00103273	0.864565	0.0889893	Unknown function
cg0872		putative GTPase	0.885783	0.174423	0.928675	0.32633	General function prediction only
cg0873	aroA	3-phosphoshikimate 1-carboxyvinyltransferase (EC:2.5.1.19), essential	0.614803	0.147078	1.25416	0.0660017	Amino acid transport and metabolism
cg0874		putative ACR, COG2135, conserved	0.616188	0.269624	1.20307	0.0073415	Unknown function
cg0875		hypothetical protein, conserved	1.41437	6.233e-06	0.919575	0.00268173	Unknown function
cg0876	sigH	RNA polymerase σ70 factor, ECF-family	1.24719	0.107619	0.890757	0.0829253	Transcription including sigma factors, RNA processing and modification
cg0877	rshA	anti-σH factor	1.14957	0.0456896	1.00241	0.315628	Transcription including sigma factors, RNA processing and modification
cg0878	whcE (whiB1)	transcriptional regulator, positive role in survival under heat and oxidative stress, WhiB homolg	0.791493	0.0791663	0.95152	0.385015	Signal transduction mechanisms
cg0879		putative membrane protein	0.159323	0.0402368	0.858584	0.0568724	Unknown function
cg0880		putative secreted protein	0.830919	0.218093	1.16026	0.0408008	Unknown function
cg0881	rhlE	probable ATP-dependent RNA helicase protein	0.570399	0.00312969	1.03632	0.0860725	Transcription including sigma factors, RNA processing and modification
cg0882		hypothetical protein, conserved	1.46481	0.0160519	1.15201	0.0360262	Unknown function
cg0883		putative secreted protein, conserved	1.1837	0.236136	0.912172	0.35636	Unknown function
cg0884		hypothetical protein, conserved	1.37126	0.109585	0.940072	0.330587	Unknown function
cg0885		putative helicase, UvrD/Rep-family	0.956936	0.39319	1.05452	0.191537	General function prediction only
cg0886		putative DNA helicase II protein (EC:3.6.1.-), maybe involved in folate or lipopolysaccharide biosynthesis, Starch and sucrose metabolism	0.608475	0.0458943	1.20191	0.114685	General function prediction only
cg0887	cglK	major potassium uptake system, essential for pH homeostasis and growth at acidic pH, VIC superfamily	1.21067	0.135092	1.00256	0.36944	Inorganic ion transport, metabolism, and storage
cg0888		putative NTP pyrophosphohydrolase	2.71815	0.144775	1.16707	0.0135221	General function prediction only
cg0889		putative DNA helicase RecQ (EC:3.6.1.-), maybe involved in folate or lipopolysaccharide biosynthesis, Starch and sucrose metabolism	1.69737	0.0230392	1.22203	0.0399124	DNA replication, recombination, repair, and degradation
cg0890		hypothetical protein, conserved	6.83272	0.0291682	0.88335	0.203407	Unknown function
cg0891		putative metal-dependent hydrolase	0.703979	0.044729	1.08206	0.0886568	General function prediction only
cg0892		hypothetical protein	0.487914	0.00244981	0.883916	0.00818063	Unknown function
cg0893		putative secreted protein containing a PDZ domain	0.667576	0.118954	0.955316	0.318552	Unknown function
cg0894		putative secreted protein, conserved	0.801706	0.148455	0.909289	0.0603198	Unknown function
cg0895		hypothetical protein	0.519017	0.00992254	1.03589	0.242258	Unknown function
cg0896		putative membrane protein	0.441767	0.0224201	0.979639	0.442933	Unknown function
cg0897	pdxR	pyridoxal phosphate biosynthesis transcriptional regulator, aminotransferase, GntR-family	1.22548	0.184017	0.840241	0.175648	Signal transduction mechanisms
cg0898	pdxS	pyridoxal 5-phosphate PLP synthase subunit	0.72509	0.0204251	0.818766	0.0907375	Coenzyme transport and metabolism
cg0899	pdxT	pyridoxal 5-phosphate PLP synthase subunit, glutamine amidotransferase	0.493245	0.0494504	0.779017	0.0167861	Coenzyme transport and metabolism
cg0900		putative membrane protein	/	/	0.996116	0.329982	Unknown function
cg0901		putative secreted protein	0.406307	0.00119227	0.808504	0.062108	Unknown function
cg0902		hypothetical protein	/	/	2.13799		Unknown function
cg0903		hypothetical protein, conserved	/	/	1.44497		Unknown function
cg0905	psp2	putative secreted protein	0.18415	0.0133345	1.22583	0.00882691	Unknown function
cg0906		hypothetical protein	0.673735	0.0929103	0.956654	0.193345	Unknown function
cg0907		hypothetical protein	0.440956	0.0524359	1.03642	0.356023	Unknown function
cg0908		putative secreted protein	1.12021	0.168736	1.0703	0.0964512	Unknown function
cg0909		hypothetical protein	0.948292	0.419502	0.775621	0.0331957	Unknown function
cg0910	hisN	L-histidinol-phosphate phosphatase (EC:3.1.3.15)	0.786134	0.0340905	1.01177	0.401094	Amino acid transport and metabolism
cg0911		putative inositol monophosphatase (EC:3.1.3.25)	0.790486	0.259561	0.985897	0.494822	Carbon source transport and metabolism
cg0913	prfB	peptide chain release factor 2 RF-2	1.04841	0.257443	0.733376	0.0371027	Translation, ribosomal structure and biogenesis
cg0914	ftsE	cell division ATP-binding protein, FtsE-family	1.89788	0.0370743	0.947643	0.255756	Cell division, chromosome partitioning
cg0915	ftsX	putative cell division protein, FtsX-family	1.72277	0.0304798	1.13022	0.0666237	Cell division, chromosome partitioning
cg0916	smpB	SsrA-binding protein	1.63421	0.192488	0.801496	0.148044	Protein turnover and chaperones
cg0918		putative uroporphyrin-III C-methyltransferase	0.650855	0.00446794	0.846835	0.139464	Transport and metabolism of further metabolites
cg0919	tnp18a	transposase	1.78423	0.300578	0.936408	0.250285	DNA replication, recombination, repair, and degradation
cg0921		putative cytoplasmic siderophore-interacting protein	0.598818	0.00276391	0.863728	0.292521	Inorganic ion transport, metabolism, and storage; Transport and metabolism of further metabolites
cg0922		putative secreted siderophore-binding lipoprotein	1.05477	0.211944	0.890478	0.337277	Inorganic ion transport, metabolism, and storage; Transport and metabolism of further metabolites
cg0923		putative membrane protein	1.61925	0.0818752	1.14206	0.11032	Unknown function
cg0924		putative ABC-type putative iron-siderophore transporter, substrate-binding lipoprotein	0.108803	0.00737532	0.822539	0.0202974	Inorganic ion transport, metabolism, and storage; Transport and metabolism of further metabolites
cg0926		putative putative iron-siderophore transporter, permease subunit	0.561274	0.152021	0.97836	0.486399	Inorganic ion transport, metabolism, and storage; Transport and metabolism of further metabolites
cg0927		putative ABC-type putative iron-siderophore transporter, permease subunit	0.397091	0.0147579	0.968651	0.426331	Inorganic ion transport, metabolism, and storage; Transport and metabolism of further metabolites
cg0928		putative ABC-type putative iron-siderophore transporter, ATPase subunit	0.271882	0.163044	1.26263	0.00157392	Inorganic ion transport, metabolism, and storage; Transport and metabolism of further metabolites
cg0931		putative pyridoxal phosphate aminotransferase, AT class I (EC:2.6.1.1)	0.414811	0.037321	1.05091	0.256509	General function prediction only
cg0932		putative membrane protein	1.57603	0.17372	1.01477	0.350268	Unknown function
cg0933		putative DNA or RNA helicase of superfamily II	1.14115	0.31707	0.834113	0.223996	General function prediction only
cg0934		hypothetical protein, conserved	0.931825	0.443763	1.18234	0.0976845	Unknown function
cg0935		hypothetical protein, conserved	0.340147	0.0152322	0.824001	0.0396388	Unknown function
cg0936	rpf1	resuscitation promoting factor	3.14325	0.0939928	0.831447	0.143015	Cell wall/membrane/envelope biogenesis
cg0938	cspB	cold shock protein	0.213081	0.040744	0.966956	0.446522	Transcription including sigma factors, RNA processing and modification
cg0939		putative secreted protein	1.93144	0.196634	0.90495	0.384641	Unknown function
cg0940		putative glutamine cyclotransferase (EC:2.3.2.5)	1.37065	0.0406148	1.09987	0.125108	Amino acid transport and metabolism
cg0941		hypothetical protein	0.604623	0.00714409	1.07599	0.127763	Unknown function
cg0944		putative xanthine/uracil symporter, nucleobase:cation symporter-2 NCS2-family	0.983194	0.394545	0.988145	0.491747	Nucleotide transport and metabolism
cg0945		putative 23S ribosomal RNA methyltransferase	0.657014	0.0132982	1.26413	0.0214003	Translation, ribosomal structure and biogenesis
cg0946		hypothetical protein, conserved	0.0587001		1.06987	0.292643	Unknown function
cg0947		hypothetical protein, conserved	0.844634	0.0372666	0.928576	0.0480042	Unknown function
cg0948	serC	phosphoserine aminotransferase, AT class IV EC:2.6.1.52, loss causes serine-auxotrophic	1.49243	0.0140327	1.07227	0.175342	Amino acid transport and metabolism
cg0949	gltA	citrate synthase (EC:2.3.3.1)	1.82182	0.20139	0.974316	0.349029	Central carbon metabolism
cg0950	fkpA	(FKBP)-type peptidyl-prolyl cis-trans isomerase (EC:5.2.1.8)	1.2575	0.0083025	1.03711	0.370421	Protein turnover and chaperones
cg0951	accD3	acetyl-coenzyme A carboxylase carboxyl transferase (EC:6.4.1.2)	1.84445	0.0183221	0.922004	0.229994	Lipid transport and metabolism
cg0952	mctB	putative integral membrane protein	0.0356366	0.0137237	0.861412	0.00919118	Unknown function
cg0953	mctC	monocarboxylic acid transporter	0.0799412	0.00144819	0.871712	0.24711	Carbon source transport and metabolism
cg0954		putative secreted protein	0.977243	0.479332	0.98196	0.426011	Unknown function
cg0955		putative secreted protein	3.83766	0.0265188	1.0914	0.200354	Unknown function
cg0957	fas-IB	fatty acid synthase, Fas-I-type, non-essential (EC:2.3.1.85)	0.751644	0.146794	0.977527	0.447038	Lipid transport and metabolism
cg0958		putative secreted protein	0.161377	0.00943608	1.20682	0.153041	Unknown function
cg0960		hypothetical protein	0.613746	0.10067	1.1178	0.273632	Unknown function
cg0961		putative homoserine O-acetyltransferase	0.426244	0.00451083	0.968542	0.433619	Amino acid transport and metabolism
cg0962		putative secreted protein	1.60281	0.00882085	0.824062	0.0465299	Unknown function
cg0963		hypothetical protein	0.201714	0.115014	0.714354	0.368243	Unknown function
cg0964	mrx1	mycoredoxin 1	2.25504	0.0656066	1.12827	0.0492571	Transport and metabolism of further metabolites
cg0965	folA	dihydrofolate reductase (EC:1.5.1.3)	1.75124	0.00821033	1.1342	0.102117	Coenzyme transport and metabolism
cg0966	thyA	thymidylate synthase (EC:2.1.1.45)	1.58589	0.00142707	0.927528	0.0698812	Nucleotide transport and metabolism
cg0967	cysQ	3-phosphoadenosine 5-phosphosulfate PAPS 3-phosphatase	0.787536	0.0849049	1.49775	0.005251	Amino acid transport and metabolism; Inorganic ion transport, metabolism, and storage
cg0968		putative ATP-dependent helicase (EC:3.6.1.-), maybe involved in folate or lipopolysaccharide biosynthesis, Starch and sucrose metabolism	0.887025	0.253497	1.20913	0.0880403	General function prediction only
cg0969	nei	endonuclease VIII removing oxidized pyrimidines MA, formamidopyrimidine-DNA glycosylase (EC:3.2.2.23)	1.32445	0.00894438	0.967779	0.392589	DNA replication, recombination, repair, and degradation
cg0970		putative membrane protein	1.06978	0.382664	0.931907	0.230086	Unknown function
cg0971		putative membrane protein	0.958209	0.455046	1.10966	0.174151	Unknown function
cg0972	cynX	putative cyanate permease, MFS-type	0.384741	1.11022e-16	1.62682	0.0388427	Inorganic ion transport, metabolism, and storage
cg0973	pgi	glucose-6-phosphate isomerase (EC:5.3.1.9)	0.027081	0.00138477	1.53192	0.0309682	Central carbon metabolism
cg0974		hypothetical protein, conserved	2.97461	0.0281864	0.944844	0.0345697	Unknown function
cg0975		putative chorismate mutase	0.73618	0.108243	0.858646	0.182881	Amino acid transport and metabolism
cg0976	pcrA	ATP-dependent helicase PCRA EC:3.6.1.-, maybe involved in folate or lipopolysaccharide biosynthesis, Starch and sucrose metabolism	0.83049	0.215908	0.916722	0.00774398	General function prediction only
cg0977		putative ABC-type transport system, involved in lipoprotein release, permease component	1.44365	0.058139	1.15955	0.00678094	Protein secretion
cg0978		putative ABC-type transport system, involved in lipoprotein release, ATPase component	1.37341	0.026405	0.90947	0.235199	Protein secretion
cg0979		putative transcriptional regulator, PadR-like-family	1.57792	0.0145809	0.817938	0.112652	Signal transduction mechanisms
cg0980	mepB	putative secreted protein related to metalloendopeptidase	1.5941	0.240954	0.644939	0.000727128	General function prediction only
cg0982		putative membrane protein	0.335918	0.00421841	1.0917	0.175388	Unknown function
cg0983	purN	phosphoribosylglycinamide formyltransferase (EC:2.1.2.2), essential	1.05406	0.425045	1.10196	0.0504549	Nucleotide transport and metabolism
cg0984	purH	bifunctional phosphoribosylaminoimidazolecarboxamide formyltransferase EC:2.1.2.3, essential	0.468791	0.0620641	1.32246	0.0910864	Nucleotide transport and metabolism
cg0985	citE	(S)-citramalyl-CoA lyase; (EC:4.1.3.6)	0.693202	0.0968612	0.965479	0.414097	Carbon source transport and metabolism
cg0986	amtR	master regulator of nitrogen control, repressor, TetR-family	1.06109	0.174531	0.800454	0.035711	Signal transduction mechanisms
cg0987		hypothetical protein, conserved	1.16596	0.172864	1.03925	0.322077	Unknown function
cg0988	rpsR	30S ribosomal protein S18	0.531268	0.0833444	1.10359	0.136754	Translation, ribosomal structure and biogenesis
cg0989	rpsN	30S ribosomal protein S14	0.762701	0.0697693	1.0813	0.165156	Translation, ribosomal structure and biogenesis
cg0990	rpmG	50S ribosomal protein L33	1.30672	0.347976	1.0135	0.352019	Translation, ribosomal structure and biogenesis
cg0991	rpmB	50S ribosomal protein L28	0.689676	0.00129777	1.01364	0.285341	Translation, ribosomal structure and biogenesis
cg0992	sutP	putative sulfate permease or related transporter MFS superfamily, SulP-family	0.561634	0.0648081	0.970963	0.45846	Inorganic ion transport, metabolism, and storage
cg0993	sutR	putative transcriptional regulator, ArsR-family	0.740387	0.23903	0.963453	0.471212	Signal transduction mechanisms
cg0994	rpmE	50S ribosomal protein L31	0.788099	0.274141	0.879748	0.059724	Translation, ribosomal structure and biogenesis
cg0995	rpmF	50S ribosomal protein L32	0.733942	0.149804	0.917461	0.264563	Translation, ribosomal structure and biogenesis
cg0996	cgtR2	two component response regulator	0.417383	0.100873	1.01698	0.347872	Signal transduction mechanisms
cg0997	cgtS2	two component sensor kinase	0.591313	0.0271088	0.972683	0.228513	Signal transduction mechanisms
cg0998	pepD	putative trypsin-like serine protease PepD, EC:3.4.21.	4.08071	0.0181592	1.1132	0.12812	Protein turnover and chaperones
cg0999		putative molybdenum cofactor biosynthesis protein	2.21195	0.0413134	0.948982	0.250907	Coenzyme transport and metabolism
cg1000		hypothetical protein, conserved	1.46623	0.287503	0.991179	0.486722	Unknown function
cg1001	mscL	large conductance mechanosensitive channel, MscL-family	0.383119	0.0104647	1.338	0.00376633	Carbon source transport and metabolism; Inorganic ion transport, metabolism, and storage
cg1002		putative secreted protein, conserved	0.0474693	0.00604999	1.3111	0.000198842	Unknown function
cg1003	fthC	5-Formyltetrahydrofolate cyclo-ligase (EC:6.3.3.2)	0.0158595	0.0118812	1.39274	0.00242546	Coenzyme transport and metabolism
cg1004	galU1	UTP-glucose-1-phosphate uridylyltransferase (EC:2.7.7.9)	1.49501	0.122972	1.14839	0.0752903	Carbon source transport and metabolism
cg1005	moeA2	molybdenum cofactor biosynthesis protein	1.26829	6.19472e-05	1.04111	0.270216	Coenzyme transport and metabolism
cg1006	act1	putative acetyltransferase	0.926955	0.4609	0.964706	0.426347	General function prediction only
cg1007		putative membrane protein	0.979551	0.47914	1.0091	0.261469	Unknown function
cg1009		putative integral membrane transporter, cyanate permease, MFS-type	0.641275	0.21719	0.889578	0.129394	Inorganic ion transport, metabolism, and storage
cg1010		putative membrane protein	2.30073	0.0176885	0.81486	0.0922594	Unknown function
cg1011		putative membrane protein	0.914839	0.399438	0.890076	0.0874076	Unknown function
cg1012	cdaS	cyclomaltodextrinase (EC:3.2.1.54), involved in starch and sucrose metabolism	1.09654	0.22942	1.16782	0.0465113	Carbon source transport and metabolism
cg1014	pmt	glycosyltransferase, protein O-mannosyltransferase (EC:2.4.1.109)	1.31706	0.226452	0.760663	0.033463	Cell wall/membrane/envelope biogenesis
cg1015		putative uroporphyrin-III C/tetrapyrrole corrin/porphyrin methyltransferase, putative methyltransferase, UPF0011-family	3.80971	0.0642974	1.40511	0.0164522	Transport and metabolism of further metabolites
cg1016	betP	glycine βine transporter, deletion mutant sensitive to osmotic stress	0.912365	0.336864	0.893311	0.124318	Transport and metabolism of further metabolites
cg1017	metS	methionyl-tRNA synthetase (EC:6.1.1.10)	0.826004	0.0331342	1.09945	0.0873622	Translation, ribosomal structure and biogenesis
cg1018		putative ATP-dependent DNA helicase protein (EC:3.6.1.-), maybe involved in folate or lipopolysaccharide biosynthesis, Starch and sucrose metabolism	2.73161	0.0196965	1.34256	0.0085988	General function prediction only
cg1019		putative metal-dependent hydrolase, conserved	1.19892	0.186852	1.19833	0.0469579	General function prediction only
cg1020		putative double-stranded β-helix domain	/	/	2.15675		Unknown function
cg1021		putative esterase/lipase	/	/	0.774296	2.22045e-16	General function prediction only
cg1022	tnp6a	transposase fragment	0.707027	0.0695376	1.07953	0.102817	DNA replication, recombination, repair, and degradation
cg1023	tnp6b	transposase fragment	0.71813	3.33067e-15	1.11683	0.235502	DNA replication, recombination, repair, and degradation
cg1024	tnp7a	transposase	0.785663	0.322083	0.920058	0.416022	DNA replication, recombination, repair, and degradation
cg1025		hypothetical protein	1.11386	0.391153	0.829081	0.266637	Unknown function
cg1027	dld	menaquinone-dependent D-lactate dehydrogenase (EC:1.1.1.28)	0.877144	0.152962	1.17957	0.107213	Carbon source transport and metabolism; Respiration and oxidative phophorylation
cg1028		putative restriction-modification system: methylase (EC:2.1.1.72)	1.21136	0.355349	1.01957	0.140253	DNA replication, recombination, repair, and degradation
cg1032	cadR	transcriptional regulator, ArsR-family	1.06106	0.414555	0.968434	0.26981	Signal transduction mechanisms
cg1033	cadD	cadmium resistance transporter, CadD-family	/	/	1.21092	0.141099	Inorganic ion transport, metabolism, and storage
cg1035		putative Dnase, TatD related	1.00465	0.437915	0.967133	0.360183	DNA replication, recombination, repair, and degradation
cg1037	rpf2	resuscitation promoting factor, secreted protein	1.68773	0.0105467	0.919722	0.240956	Cell wall/membrane/envelope biogenesis
cg1038	ksgA	putative dimethyladenosine transferase (EC:2.1.1.48)	0.934384	0.209088	1.09936	0.0767772	DNA replication, recombination, repair, and degradation; Translation, ribosomal structure and biogenesis
cg1039	ipsE	Isopentenyl monophosphate kinase (EC:2.7.1.148)	1.12067	0.308724	1.17478	0.0793158	Transport and metabolism of further metabolites
cg1040		putative ATPase component of ABC transporters with duplicated ATPase domains	1.14575	0.206481	1.10728	0.0497126	General function prediction only
cg1041	pdxK	pyridoxal/pyridoxine/pyridoxamine kinase (EC:2.7.1.35)	0.840678	0.323176	0.992576	0.465048	Coenzyme transport and metabolism
cg1043		putative thiol-disulfide isomerase and thioredoxins, conserved	0.947019	0.4116	1.06549	5.29853e-09	Post-translational modification
cg1044		hypothetical protein, conserved	2.67059	0.0690654	0.9733	0.454432	Unknown function
cg1045		hypothetical protein, conserved	0.573698	0.00619885	1.14758	0.0760633	Unknown function
cg1046	ppk2A (ppk2)	polyphosphate kinase	0.987814	0.349129	1.05728	0.197268	Inorganic ion transport, metabolism, and storage
cg1048		putative haloacid dehalogenase/epoxide hydrolase-family	1.44396	0.000554909	0.827258	0.159976	Carbon source transport and metabolism
cg1049		putative enoyl-CoA hydratase/isomerase (EC:4.2.1.17), maybe essential	0.553746	0.0332196	1.04317	0.239176	Carbon source transport and metabolism
cg1050		putative membrane protein	0.945564	0.446573	0.924568	0.265286	Unknown function
cg1051		hypothetical protein	0.472643	0.0230089	0.978067	0.436405	Unknown function
cg1052	cmt3	corynomycolyl transferase EC:2.3.1.122	2.50445	0.00462679	0.75237	0.115085	Cell wall/membrane/envelope biogenesis
cg1053	mmpLR	transcriptional regulator, TetR-family	1.77961	0.131679	0.685088	0.0554731	Signal transduction mechanisms
cg1055	rraA (menG is cg556)	ribonuclease activity regulator protein RraA or S-Adenosylmethionine:2-demethylmenaquinone methyltransferase	1.62559	0.0867823	0.883325	0.159502	Transcription including sigma factors, RNA processing and modification
cg1056		putative membrane protein	1.33682	0.35736	0.988854	0.464665	Unknown function
cg1057		hypothetical protein	2.48024	0.134962	1.07909	0.0459021	Unknown function
cg1059		hypothetical protein, conserved	1.52407		1.2044	0.073179	Unknown function
cg1060	prfC	putative peptide chain release factor 3 EF-G	0.717075	0.0543537	1.12497	0.0569699	Translation, ribosomal structure and biogenesis
cg1061	urtA	ABC-type urea uptake system, substrate binding protein	0.208764	0.171616	1.04946	0.152713	Transport and metabolism of further metabolites
cg1062	urtB	ABC-type urea uptake system, permease subunit	0.78211	5.93969e-15	1.08801	0.0664363	Transport and metabolism of further metabolites
cg1064	urtC	ABC-type urea uptake system, permease subunit	/	/	1.39375	0.0744605	Transport and metabolism of further metabolites
cg1065	urtD	ABC-type urea uptake system	0.775673	4.55191e-15	1.25198	0.154235	Transport and metabolism of further metabolites
cg1066	urtE	ABC-type urea uptake system, ATP binding protein	4.56635	0.0935673	1.10633	0.0191606	Transport and metabolism of further metabolites
cg1067	pth2	peptidyl-tRNA hydrolase (EC:3.1.1.29)	0.815099	0.181418	0.993448	0.474433	Translation, ribosomal structure and biogenesis
cg1068		putative oxidoreductase (EC:1.13.-), maybe involved in nitrogen metabolism	2.13998	0.0465706	1.33832	0.00163791	General function prediction only
cg1069	gapB (gapX)	glyceraldehyde-3-phosphate dehydrogenase gluconeogenesis	0.957465	0.482243	0.843973	0.148511	Central carbon metabolism
cg1070		hypothetical protein, conserved	0.757191	0.0106133	1.02671	0.165976	Unknown function
cg1071	pth1	peptidyl-tRNA hydrolase (EC:3.1.1.29)	1.19269	0.0851168	0.881305	0.0721343	Translation, ribosomal structure and biogenesis
cg1072	rplY	50S ribosomal protein L25 general stress protein Ctc	0.781327	0.124594	0.971779	0.442584	Translation, ribosomal structure and biogenesis
cg1073		putative lactoylglutathione lyase	1.69328	0.0073153	1.2411	0.000304742	Transport and metabolism of further metabolites
cg1074		hypothetical protein, conserved	0.78135	0.215087	1.11259	0.0851273	Unknown function
cg1075	prsA	ribose-phosphate pyrophosphokinase (EC:2.7.6.1),	1.40899	0.152918	1.03165	0.314035	Amino acid transport and metabolism; Nucleotide transport and metabolism; Coenzyme transport and metabolism
cg1076	glmU	putative UDP-N-acetylglucosamine pyrophosphorylase (EC:2.7.7.23)	0.752494	0.248917	0.615029	0.0203219	Cell wall/membrane/envelope biogenesis
cg1077		putative permease of the major facilitator superfamily	1.82951	0.0311691	0.80221	0.0939887	General function prediction only
cg1080		putative multicopper oxidase	1.26569	0.0840772	1.22972	0.0118978	General function prediction only
cg1081		putative ABC-type multidrug transport system, ATPase component	1.53775	0.0520583	1.12752	0.115555	General function prediction only
cg1082		putative membrane protein	1.17625	0.0982015	1.2971	0.013362	Unknown function
cg1083	cgtS1	two component sensor kinase	1.59451	0.0801953	1.06821	0.117373	Post-translational modification; Signal transduction mechanisms
cg1084	cgtR1	two component response regulator	1.56379	0.189946	1.00777	0.203774	Signal transduction mechanisms
cg1085		hypothetical protein	0.0358265	0.00772858	1.46925	0.0076632	Unknown function
cg1086		putative membrane protein	1.00897	0.472255	0.993175	0.480822	Unknown function
cg1087		putative membrane protein	0.0358482	0.0108608	1.29482	0.0381626	Unknown function
cg1088		putative ABC-type multidrug/protein/lipid transport system, ATPase component	0.28265	0.037228	1.23687	5.23615e-06	General function prediction only
cg1089		putative ABC-type multidrug/protein/lipid transport system, ATPase component	0.925384	0.426758	1.13704	0.0469059	General function prediction only
cg1090	ggtB	γ-glutamyltranspeptidase precursor PR (EC:2.3.2.2)	0.0182448	0.00775538	1.07943	0.278082	Transport and metabolism of further metabolites
cg1091		hypothetical protein	0.583993	0.0788253	1.03807	0.355875	Unknown function
cg1092		putative secreted protein	0.753621	0.169471	1.00917	0.450948	Unknown function
cg1094	tnp3a	transposase	1.43813	0.175396	1.20256	0.208456	DNA replication, recombination, repair, and degradation
cg1095		hypothetical protein	0.734204	0.0113547	0.921438	0.320278	Unknown function
cg1096		hypothetical protein	1.10533	0.255922	0.874829	0.120126	Unknown function
cg1097		hypothetical protein	2.36341	0.0101252	0.902962	0.231653	Unknown function
cg1098		putative transcriptional regulator, TetR-family	0.831306	0.292603	0.888292	0.191878	Signal transduction mechanisms
cg1099	mfd	putative transcription-repair coupling factor TRCF	0.812639	0.150437	1.16266	0.030918	Transcription including sigma factors, RNA processing and modification
cg1100		putative ABC transporter transmembrane component	1.38232	0.0410341	1.37892	0.0389649	General function prediction only
cg1101		putative ABC-type multidrug/protein/lipid transport system, membrane component	1.26217	0.0664707	0.992484	0.471505	General function prediction only
cg1103		putative membrane protein	2.42884	0.0367769	1.21991	0.0437821	Unknown function
cg1104		putative esterase, membrane protein	1.7453	0.0228115	1.26861	0.055504	General function prediction only
cg1105	lysI	L-lysine permease	1.67582	0.144198	1.2271	0.0397867	Amino acid transport and metabolism
cg1106		hypothetical protein, conserved	1.91725	0.0231051	1.00863	0.290674	Unknown function
cg1107		putative pyrophosphatase	1.57222	0.0689102	0.87913	0.0278569	General function prediction only
cg1108	porC	putative secreted protein	0.926414	0.295587	1.00583	0.455139	Unknown function
cg1109	porB	anion-specific porin precursor	1.15307	0.210936	1.114	0.182278	Inorganic ion transport, metabolism, and storage
cg1110		hypothetical protein, conserved	1.47001	0.0374129	0.895183	0.113016	Unknown function
cg1111	eno	enolase EC:4.2.1.11 phosphopyruvate hydratase	0.0838585	0.00746003	1.26749	0.113389	Central carbon metabolism
cg1112		putative septum formation initiator, secreted protein of the FtsB-family	0.638762	0.0205684	1.08905	0.286249	Cell division, chromosome partitioning
cg1113		hypothetical protein, conserved	1.83021	0.132167	1.19073	0.0242133	Unknown function
cg1115	ppx2	exopolyphosphatase (EC:3.6.1.11)	1.26905	0.126526	1.11237	0.00130358	Inorganic ion transport, metabolism, and storage
cg1116	tdcB	threonine dehydratase (EC:4.3.1.19)	/	/	0.983389	0.492673	Amino acid transport and metabolism
cg1117		hypothetical protein	1.68584	0.160773	0.859085	0.318343	Unknown function
cg1118		putative pyrimidine reductase, riboflavin biosynthesis	1.6052	0.161108	1.09375	0.167435	Coenzyme transport and metabolism
cg1119		putative stress-responsive transcriptional regulator, conserved, phage shock protein C (PspC) family	1.91899	0.0808487	0.97487	0.473276	Signal transduction mechanisms
cg1120	ripA	transcriptional regulator of iron proteins and repressor of aconitase, AraC-family	0.621774	0.0122648	0.725898	0.0650408	Signal transduction mechanisms
cg1121		putative permease of the major facilitator superfamily	2.35534	0.00553597	1.05557	0.0925264	General function prediction only
cg1122		putative secreted protein	0.474296	0.00379215	1.06917	0.201798	Unknown function
cg1123	greA	transcription elongation factor	0.578495	0.161878	0.95968	0.408164	Transcription including sigma factors, RNA processing and modification
cg1125		hypothetical protein, conserved	0.474922	0.014652	1.02405	0.208484	Unknown function
cg1127	mca	mycothiol S-conjugate amidase	1.10819	0.267344	0.998104	0.34254	Transport and metabolism of further metabolites
cg1128		putative protein, similar to ribosomal protein S2	0.94893	0.472529	0.741676	0.0122664	Unknown function
cg1129	aroF	3-deoxy-7-phosphoheptulonate synthase	0.221125	0.00430391	1.03102	0.252176	Amino acid transport and metabolism
cg1130	uppS1	putative undecaprenyl pyrophosphate synthetase, maybe involved in terpenoid biosynthesis	1.5089	0.248	0.975445	0.46174	Transport and metabolism of further metabolites
cg1131		hypothetical protein, conserved	0.863285	0.309702	1.07414	0.109474	Unknown function
cg1132	coaA	pantothenate kinase EC:2.7.1.33	0.619987	0.181808	0.977344	0.469088	Coenzyme transport and metabolism
cg1133	glyA	serine hydroxymethyltransferase EC:2.1.2.1	0.0600724	0.0258608	0.899366	0.12583	Coenzyme transport and metabolism
cg1134	pabAB (pab)	p-aminobenzoate synthase component I and II EC:6.3.5.8	0.115928	0.0197994	0.984435	0.469884	Coenzyme transport and metabolism
cg1135	pabC	putative branched-chain amino acid aminotransferase/4-amino-4-deoxychorismate lyase, conserved	0.851184	1.55986e-14	1.18349	0.0608022	Amino acid transport and metabolism
cg1136		hypothetical protein, conserved	2.45619	0.108174	1.05847	0.239545	Unknown function
cg1137		putative transcriptional regulator, LysR-type	1.07294	0.240548	1.0786	0.155397	Signal transduction mechanisms
cg1138		putative phosphinothricin acetyltransferase , GNAT-family EC:2.3.1.-	1.99883	0.00188718	0.993688	0.468492	General function prediction only
cg1139		putative allophanate hydrolase subunit 2	0.72779	0.117923	1.0066	0.179789	Transport and metabolism of further metabolites
cg1140		putative allophanate hydrolase subunit 1	1.47559	0.256456	1.01537	0.0516105	Transport and metabolism of further metabolites
cg1141		putative protein, homolog of lactam utilization protein B, UPF0271-family, conserved	0.971881	0.498301	1.01767	0.314336	Carbon source transport and metabolism
cg1142		putative Na+/proline, Na+/panthothenate symporter	0.770658	0.0340256	1.03648	0.258437	Amino acid transport and metabolism; Coenzyme transport and metabolism
cg1143		putative transcriptional regulator, GntR-family	0.954596	0.478709	0.899018	0.19935	Signal transduction mechanisms
cg1144		hypothetical protein	0.90005	0.239035	1.03004	0.297298	Unknown function
cg1145	fumC (fum)	fumarase fumarate hydratase (EC:4.2.1.2)	0.709581	0.254603	1.0131	0.345671	Central carbon metabolism
cg1147	ssuI	NADPH-dependent FMN reductase (EC:1.5.1.29) required for sulfonate and sulfonate ester utilization	11.2576	0.000432842	1.07724	0.299392	Transport and metabolism of further metabolites
cg1148		hypothetical protein	1.10522	0.298861	1.24055		Unknown function
cg1149		hypothetical protein	0.799114	0.338516	0.714662	0.0158173	Unknown function
cg1150		putative NADPH-dependent FMN reductase	1.9427	0.0133156	0.98131	0.480726	General function prediction only
cg1151	seuA	FMNH2-dependent monooxygenase for sulfonate ester utilization EC:1.14.14.-	50.3066	0.00566443	0.759969	0.069894	Transport and metabolism of further metabolites
cg1152	seuB	FMNH2-dependent monooxygenase for sulfonate ester utilization EC:1.14.14.-	30.5864	0.00118682	1.01504	0.302778	Transport and metabolism of further metabolites
cg1153	seuC	FMNH2-dependent monooxygenase EC:1.14.14.- for sulfonate ester utilization	19.3316	0.000230676	1.05664	0.281622	Transport and metabolism of further metabolites
cg1156	ssuD2	FMNH2-dependent aliphatic sulfonate monooxygenase EC:1.14.14.5 for sulfonate utilization	5.75833	0.000686665	1.06063	0.00959453	Transport and metabolism of further metabolites
cg1157	fbp	fructose 1,6 bisphosphatase, class II (EC:3.1.3.11) essential for gluconeogenesis	0.444378	0.0312036	1.08331	0.101748	Central carbon metabolism
cg1158		putative secreted protein	0.632306	0.225305	1.09055	0.101912	Unknown function
cg1159		putative secreted protein	3.44482	4.70374e-05	0.912816	0.149725	Unknown function
cg1160		putative protein, similar to arabinose efflux permease	1.94292	0.0182529	1.1536	0.0080209	Unknown function
cg1162	xseB	exodeoxyribonuclease VII small subunit (EC:3.1.11.6)	1.76617	0.00543054	1.15275	0.00319202	DNA replication, recombination, repair, and degradation
cg1163	xseA	exodeoxyribonuclease VII large subunit (EC:3.1.11.6)	1.68398	0.00904891	1.06311	0.322644	DNA replication, recombination, repair, and degradation
cg1164	ipsH (lytB)	4-hydroxy-3-methylbut-2-enyl diphosphate reductase (EC:1.17.1.2)	2.01541	0.074265	1.31967	0.0147607	Transport and metabolism of further metabolites
cg1165		putative γ-aminobutyrate permease or related permease, conserved	0.656002	0.0940181	0.92536	0.113741	Carbon source transport and metabolism; Transport and metabolism of further metabolites
cg1166		putative membrane protein	0.353465	0.0543297	1.07425	0.0550788	Unknown function
cg1167	metS	secondary methionine uptake system of the NSS (neurotransmitter:sodium symporter) family	0.87071	0.0723144	1.1884	0.0786108	Amino acid transport and metabolism
cg1169	metP	secondary methionine uptake system of the NSS (neurotransmitter:sodium symporter) family, Na+:methionine symporter, SNF-family	0.70832	0.0244568	0.726416	0.161477	Amino acid transport and metabolism
cg1170	cmt5	corynomycolyl transferase (EC:2.3.1.122)	0.855896	0.397779	0.839068	0.0652751	Cell wall/membrane/envelope biogenesis
cg1171		putative GTPase	1.19266	0.030596	0.936009	0.171068	General function prediction only
cg1172		putative protein, conserved, putative plasmid maintenance system killer protein	1.24739	0.0901559	1.02527	0.222846	General function prediction only
cg1173		putative protein, conserved, plasmid maintenance system antidote protein	1.28314	0.0517148	0.948366	0.295122	General function prediction only
cg1174	arcB	putative ornithine carbamoyltransferase protein (EC:2.1.3.3)	1.10409	0.284043	1.04072	0.260407	Amino acid transport and metabolism
cg1175		putative acetyltransferase, GNAT-family	0.927527	0.459345	0.939752	0.324071	General function prediction only
cg1178	tnp9a	transposase	3.12698	0.088634	0.983161	0.491959	DNA replication, recombination, repair, and degradation
cg1179		putative sensory box/GGDEF-family membrane protein	2.0632	0.0501269	1.06194	0.109915	Unknown function
cg1180		putative glycosyltransferase, probably involved in cell wall biogenesis	3.87102	0.000322073	1.11271	0.00493759	General function prediction only
cg1181		putative glycosyltransferase, probably involved in cell wall biogenesis	4.76914	0.00382313	1.09568	0.0644472	General function prediction only
cg1182		putative membrane protein	5.30386	0.00787416	1.17746	0.00380293	Unknown function
cg1183		putative dinucleotide-utilizing enzyme	6.46244	0.0143982	0.971626	0.385332	Unknown function
cg1184	tnp1c	transposase fragment, putative pseudogene	1.49533		0.644016	0.15458	DNA replication, recombination, repair, and degradation
cg1185	tnp1b	transposase fragment, putative pseudogene	0.879756	0.47475	0.759049	0.0909585	DNA replication, recombination, repair, and degradation
cg1187	tnp1a	transposase fragment, putative pseudogene	1.4762	0.00142899	0.968807	0.347763	DNA replication, recombination, repair, and degradation
cg1189		hypothetical protein	1.32756	0.373621	0.805179	0.309706	Unknown function
cg1190		hypothetical protein	1.66755	0.052411	1.10613	0.0165252	Unknown function
cg1191		hypothetical protein	1.65944	0.0377926	0.903908	0.107964	Unknown function
cg1192		putative aldo/keto reductase	/	/	0.601354		General function prediction only
cg1193		putative carboxymuconolactone decarboxylase, conserved	/	/	1.42802		Carbon source transport and metabolism
cg1195		putative sulfate permease or related transporter MFS superfamily, SulP-family	0.625212	0.182396	0.989331	0.482564	General function prediction only
cg1197		putative ABC-type transport systems, involved in lipoprotein release, ATPase component	/	/	1.02949	0.439607	Cell wall/membrane/envelope biogenesis
cg1198		hypothetical protein	/	/	1.20961		Unknown function
cg1199		hypothetical protein	1.64149	0.0170417	0.547886	0.199897	Unknown function
cg1201		hypothetical protein	1.24035		0.95552	0.000804551	Unknown function
cg1202		hypothetical protein, conserved	2.79409	0.0713849	1.22698	0.00676912	Unknown function
cg1203		putative Mg-chelatase subunit ChlI	2.82608	0.0381571	1.04377	0.338736	Inorganic ion transport, metabolism, and storage
cg1204		putative protein, similarity to 2,3-PDG dependent phosphoglycerate mutase pgm-amycolatopsis methanolica, conserved	1.93447	0.0108652	1.10439	0.19424	General function prediction only
cg1205		putative protein, strong similarity to hypothetical protein Rv2133c-Mycobacterium tuberculosis, conserved	5.01525	0.0419492	1.09203	0.163545	Unknown function
cg1206		putative PEP phosphonomutase or related enzyme, conserved	1.3816	0.00448922	1.23087	0.0377917	Transport and metabolism of further metabolites
cg1207		putative ATPase component of ABC transporters with duplicated ATPase domains	1.51293	0.000479985	1.32302	0.0425428	General function prediction only
cg1208		hypothetical protein, conserved	1.28169	0.177816	1.02627	0.332666	Unknown function
cg1209	phnA	putative Zn-ribbon-containing protein involved in phosphonate metabolism	0.709983	0.0909098	1.03928	0.223129	Transport and metabolism of further metabolites
cg1210		putative membrane protein	1.62274	0.0519714	0.720887	0.05019	Unknown function
cg1211		putative transcriptional regulator, MarR-family	2.40534	0.104318	0.888136	0.270667	Signal transduction mechanisms
cg1212		putative permease of the major facilitator superfamily, antibiotic efflux permease	0.983175	0.477706	0.864735	0.0696103	General function prediction only
cg1213	tnp1a	transposase	0.210123	0.0985255	0.731135	0.00763549	DNA replication, recombination, repair, and degradation
cg1214	nadS	cysteine desulfurase-like protein involved in Fe-S cluster assembly, required for maturation of NadA	0.585192	0.059515	0.679835	0.0122913	Coenzyme transport and metabolism
cg1215	nadC	quinolinate phosphoribosyltransferase	1.13805	0.260402	0.728	0.0218921	Coenzyme transport and metabolism
cg1216	nadA	quinolinate synthetase	0.55726	0.0557488	0.541126	0.0284758	Coenzyme transport and metabolism
cg1218	ndnR	transcriptional repressor of NAD de novo biosynthesis genes ndnR-nadA-nadC-nadS operon, NrtR-family	1.07236	0.388913	0.407886	0.00676364	Signal transduction mechanisms
cg1219		putative membrane protein	2.42876	0.00632663	0.704006	0.00175642	Unknown function
cg1220		putative Zn-dependent hydrolase of the β-lactamase fold	1.66137	0.0843092	1.11632	0.00689199	General function prediction only
cg1221		hypothetical protein, conserved	1.03872	0.396195	1.21552	0.00379229	Unknown function
cg1222	lplA	lipoate-protein ligase A (EC:6.3.2.-)	1.37619	0.128878	1.2124	0.00822602	Coenzyme transport and metabolism
cg1224	phnB2	similarity to alkylphosphonate uptake operon protein PhnB-Escherichia coli, conserved	0.975283	0.490277	1.1932	0.0785678	Transport and metabolism of further metabolites
cg1225	benK3 (pcaK)	putative benzoate transport transmembrane protein	1.10213	0.0674898	0.930673	0.167797	Carbon source transport and metabolism
cg1226	pobB (pobA)	4-hydroxybenzoate 3-monooxygenase (EC:1.14.13.2)	1.27682	0.161144	0.826424	0.13601	Carbon source transport and metabolism
cg1227	ykoE	thiamin-regulated ECF transporter for hydroxymethylpyrimidine, substrate-specific component	2.10371	0.0425866	1.06938	0.315402	Coenzyme transport and metabolism
cg1228	ykoD	thiamin-regulated ECF transporter for hydroxymethylpyrimidine, duplicated ATPase component of energizing module	3.3226	0.142514	1.30261	0.065536	Coenzyme transport and metabolism
cg1229	ykoC	thiamin-regulated ECF transporter for hydroxymethylpyrimidine, transmembrane component of energizing module	1.3481	0.0936588	1.30381	0.0914926	Coenzyme transport and metabolism
cg1230		hypothetical protein, conserved	0.871543	0.317928	1.20512	0.151397	Unknown function
cg1231	chaA	Na+(K+)/H+ antiporter	1.2069	0.0197428	1.0918	0.292092	Inorganic ion transport, metabolism, and storage
cg1232		putative protein, conserved, LmbE-family	1.09374	0.0614922	0.92937	0.346504	Unknown function
cg1233		putative membrane protein	0.376622	0.114585	1.37233	0.000955249	Unknown function
cg1234		putative excinuclease ATPase subunit-UvrA-like protein	1.42383	0.0900042	1.25967	0.0245147	DNA replication, recombination, repair, and degradation
cg1236	tpx (prx)	thiol peroxidase (EC:1.11.1.-), more general peroxidase, also NrdH as cofactor	0.13013	0.0114646	1.41868	0.0724022	Transport and metabolism of further metabolites
cg1237		putative membrane protein	1.61166	0.119871	1.10469	0.326041	Unknown function
cg1238		putative membrane protein	1.60916	0.0752119	1.12322	0.0344225	Unknown function
cg1239		putative 2-dehydropantoate 2-reductase	1.21366	0.307648	1.04204	0.268304	Coenzyme transport and metabolism
cg1240		hypothetical protein	0.458819	0.0116551	0.824536	0.0876976	Unknown function
cg1241		putative protein, conserved- putative pseudogene C-terminal fragment	0.404978	0.0398187	1.10923	0.0252877	Unknown function
cg1242		putative membrane protein	0.627766	0.0325888	1.08045	0.0986628	Unknown function
cg1243		putative secreted trypsin-like serine protease, contain C-terminal PDZ domain	0.418611	0.00797955	1.08004	0.0303867	General function prediction only
cg1244	arsC4	arsenate reductase, glutaredoxin-family (EC:1.20.4.1)	0.383381	0.001048	1.07954	0.307746	Inorganic ion transport, metabolism, and storage
cg1245		putative membrane protein	1.27494	0.119148	0.852781	0.112531	Unknown function
cg1246		hypothetical protein, conserved	1.50038	0.0154204	0.92942	0.140124	Unknown function
cg1247		putative secreted protein	1.87519	0.0384044	0.729577	0.00320103	Unknown function
cg1248		putative GTPase involved in stress response	0.868951	0.359708	0.715354	0.0409441	General function prediction only
cg1249	lpqW	putative protein, homologe to Rv1166 lipoprotein required to channel PIM4 into LAM synthesis, cell envelope	0.380716	0.0658301	1.09624	0.062395	Cell wall/membrane/envelope biogenesis
cg1250	mshB	putative N-acetyl-1-D-myo-inosityl-2-amino-2-deoxy-α-D-glucopyranoside deacetylase (EC:3.5.1.-)	0.518767	0.0148973	1.19242	0.0381566	Cell wall/membrane/envelope biogenesis
cg1251		putative membrane protein	0.6144	0.0214185	1.14546	0.0185803	Unknown function
cg1252	fdxC	ferredoxin no. 3	0.430234	0.00999207	0.906274	0.0772567	Transport and metabolism of further metabolites
cg1253	dapC	N-succinyl-2,6-diaminopimelate aminotransferase, AT class I (EC:2.6.1.17)	0.629567	0.0385009	1.00442	0.431326	Amino acid transport and metabolism
cg1254		putative membrane protein	0.929741	0.405756	0.871402	0.196252	Unknown function
cg1255		putative HNH endonuclease, conserved	6.48523	0.080101	0.956469	0.321396	General function prediction only
cg1256	dapD	tetrahydrodipicolinate succinylase, 2,3,4,5-Tetrahydropyridine-2,6-dicarboxylate N-succinyltransferase EC:2.3.1.117, essential for lysine synthesis	0.689254	0.0499196	0.782599	0.0299067	Amino acid transport and metabolism
cg1257	aroP	aromatic amino acid and histidine transport protein	0.275805	0.0188472	0.850847	0.296236	Amino acid transport and metabolism
cg1259	dapD2	putative 2,3,4,5-tetrahydropyridine-2,6-dicarboxylate N-succinyltransferase EC:2.3.1.-, similar to tetrahydrodipicolinate N-succinyltransferase,	1.57345	0.117844	1.14508	0.0618895	Amino acid transport and metabolism
cg1260	dapE	succinyl-diaminopimelate desuccinylase EC:3.5.1.18	0.785905	0.00669285	1.12538	0.0929906	Amino acid transport and metabolism
cg1261		putative lysine decarboxylase-family protein	2.52006	0.0553938	1.24065	0.0028839	Amino acid transport and metabolism
cg1262	folP2	dihydropteroate synthase EC:2.5.1.15	0.988152	0.472865	1.13923	0.0175787	Coenzyme transport and metabolism
cg1263		putative glycosyltransferase involved in cell wall biogenesis	0.944157	0.447625	1.13288	0.0901037	Cell wall/membrane/envelope biogenesis
cg1264		hypothetical protein, conserved	0.863453	0.31916	0.878748	0.117193	Unknown function
cg1265		hypothetical protein, conserved	1.58193	0.0529359	0.916079	0.158073	Unknown function
cg1266	rrmA	rRNA guanine-N1-methyltransferase EC:2.1.1.51	2.84867	0.157299	0.937292	0.0559602	Translation, ribosomal structure and biogenesis
cg1267		putative β-fructosidase, levanase/invertase, (EC:3.2.1.26)	1.41954	0.0844275	1.07089	0.110815	General function prediction only
cg1268	glgA	glycogen synthase EC:2.4.1.21	0.0173742	0.00987584	1.26558	0.0162589	Carbon source transport and metabolism
cg1269	glgC	ADP-glucose pyrophosphorylase, Glucose-1-phosphate adenylyltransferase EC:2.7.7.27	0.19416	0.0876962	1.2805	0.140439	Carbon source transport and metabolism
cg1270		putative O-methyltransferase	0.997746	0.453424	0.979859	0.446896	General function prediction only
cg1271	sigE	RNA polymerase σ70 factor, ECF-family	3.10086	0.0218147	0.880997	0.123537	Transcription including sigma factors, RNA processing and modification
cg1272	cseE	Anti-σE factor	1.83745	0.0595899	0.982693	0.488592	Transcription including sigma factors, RNA processing and modification
cg1273	tatB	twin argininte translocase protein B	2.24345	0.0210852	0.874111	0.114406	Protein secretion
cg1274	mrp	ATPase involved in chromosome partitioning	1.43411	0.131892	1.04478	0.283111	Cell division, chromosome partitioning
cg1275		putative membrane protein, conserved	2.6478	0.149317	1.19102	0.000787129	Unknown function
cg1276	mgtE1	Mg/Co/Ni transporter MgtE, contains CBS domain, intracellular	1.96939	0.124697	1.06147	0.0783325	Inorganic ion transport, metabolism, and storage
cg1277		putative membrane protein, conserved	5.4696	0.0749575	1.07856	0.187772	Unknown function
cg1278		putative secreted protein, conserved	2.61309	0.0156912	0.931074	0.377417	Unknown function
cg1279		putative secreted protein	1.06924	0.314253	1.31197	0.0603969	Unknown function
cg1280	odhA	2-oxoglutarate dehydrogenase, E1 subunit of ODHc	0.635395	0.016197	0.811523	0.240888	Central carbon metabolism
cg1281		putative ABC-type multidrug/protein/lipid transport system, ATPase component	2.06374	0.00283507	1.02066	0.408298	General function prediction only
cg1282		hypothetical protein, conserved	1.30445	0.162525	1.10004	0.0305156	Unknown function
cg1283	aroE (aroE1, aroE2)	shikimate 5-dehydrogenase (EC:1.1.1.25)	1.72535	0.0824641	1.00388	0.33328	Amino acid transport and metabolism
cg1284	lipT	type B carboxylesterase (EC:3.1.1.1)	1.41236	0.0178405	1.21934	0.0325957	Lipid transport and metabolism
cg1285		hypothetical protein, conserved	1.01788	0.361715	1.09837	0.139005	Unknown function
cg1286		hypothetical protein, conserved	1.54845	0.0408281	1.02299	0.420006	Unknown function
cg1287		hypothetical protein, conserved	5.34491	0.0145539	1.27231	0.0541049	Unknown function
cg1288		putative multidrug efflux permease of the major facilitator superfamily	1.46172	0.370588	1.19778	0.0367548	General function prediction only
cg1289		putative multidrug efflux permease of the major facilitator superfamily	1.6121		0.789358	0.106527	General function prediction only
cg1290	metE	5-methyltetrahydropteroyltriglutamate--homocysteine methyltransferase EC:2.1.1.14, essential for methionine-synthesis, loss causes methionine bradytrophy	0.321571	8.27222e-05	0.759679	0.057023	Amino acid transport and metabolism
cg1291		putative membrane protein	7.08428	0.00263634	1.54816	0.064118	Unknown function
cg1292		putative flavin-containing monooxygenase 3 (EC:1.14.13.8)	3.87218	0.00945774	0.826426	0.10352	General function prediction only
cg1293		putative secreted protein	2.26982	0.0237934	1.00718	0.295375	Unknown function
cg1294		putative esterase of the α-β hydrolase superfamily	1.78702	0.0451828	0.810888	0.0762787	General function prediction only
cg1295		putative hydrolase or acyltransferase α/β hydrolase superfamily	0.875009	0.206803	1.00132	0.387657	General function prediction only
cg1298	cydC	ABC transporter, subunit I, essential for cytochrome bd oxidase assembly	0.373949	0.0703226	1.00843	0.329748	Protein turnover and chaperones
cg1299	cydD	ABC transporter, subunit II, essential for cytochrome bd oxidase assembly	0.859593	0.0975135	1.16807	0.0270813	Protein turnover and chaperones
cg1300	cydB	cytochrome bd oxidase, subunit II	1.49431	0.0956462	1.23775	0.101998	Respiration and oxidative phosphorylation
cg1301	cydA	cytochrome bd oxidase, subunit I	2.04694	0.00465693	0.980789	0.484603	Respiration and oxidative phosphorylation
cg1302		putative HKD-family nuclease	0.461282	0.00919343	1.20717	0.0228767	Nucleotide transport and metabolism
cg1303		putative NTP pyrophosphohydrolase (EC:3.6.1.-)	0.797861	0.00717486	1.12061	0.0826193	Nucleotide transport and metabolism
cg1304		putative secreted protein	0.254259	0.00601433	1.18246	0.155074	Unknown function
cg1305	pheP	L-phenylalanine transporter, essential for histidine import	1.61727	0.226413	0.629658	0.226651	Amino acid transport and metabolism
cg1307		putative superfamily II DNA and RNA helicase	2.37259	0.00805976	1.00182	0.411338	DNA replication, recombination, repair, and degradation; Transcription including sigma factors, RNA processing and modification
cg1308	rolR	transcriptional repressor of genes involved in resorcinol degradation, TetR-family	0.595835	0.0522488	0.724706	0.0304256	Signal transduction mechanisms
cg1309	rolH (mhpA)	3-3-hydroxyphenylpropionate hydroxylase or 2-polyprenyl-6-methoxyphenol hydroxylase and related FAD-dependent oxidoreductase	1.21256		0.82266	0.111597	Carbon source transport and metabolism
cg1310	rolM (tfdF)	maleylacetate reductase (EC:1.3.1.32)	1.72699	0.0299835	1.07667	0.316104	Carbon source transport and metabolism
cg1311	rolD (catA2)	catechol 1,2-dioxygenase (EC:1.13.11.37)	1.02449	0.450123	1.17948	0.0317648	Carbon source transport and metabolism
cg1312		putative membrane protein	0.86426	0.112416	0.919084	0.217337	Unknown function
cg1313		putative secreted lipoprotein	0.34288	0.0322651	1.15937	0.0565012	Unknown function
cg1314	putP	proline transport system	0.500193	0.0462298	0.993257	0.480012	Amino acid transport and metabolism
cg1316		putative superfamily II DNA/RNA helicases, SNF2-family	1.01759	0.365448	1.10991	0.132917	DNA replication, recombination, repair, and degradation; Transcription including sigma factors, RNA processing and modification
cg1317		putative 2-oxo acid dehydrogenase, conserved	1.98068	0.0202272	0.942503	0.114807	General function prediction only
cg1318		putative DNA repair exonuclease, conserved	3.05179	0.0163884	1.07297	0.125561	DNA replication, recombination, repair, and degradation
cg1319		putative ATPase involved in DNA repair, conserved	4.20009	0.0199448	1.00691	0.0448511	DNA replication, recombination, repair, and degradation
cg1320	lipP	lipase, conserved	1.77969	0.0888859	1.25259	0.137475	Lipid transport and metabolism
cg1321	atoE	putative short-chain fatty acids transporter	15.6074		1.09993	0.357684	Lipid transport and metabolism
cg1322		putative protein, conserved, YceI homolog	1.40815	0.0173182	1.18094	0.114196	Unknown function
cg1324	rosR	transcriptional regulator of oxidative stress response MarR-family	0.905773	0.287859	1.05009	0.133582	Signal transduction mechanisms
cg1325		putative stress-responsive transcriptional regulator, conserved	1.55868	0.23544	0.968043	0.327987	Signal transduction mechanisms
cg1326		hypothetical protein	0.16904	0.00817436	0.822737	0.0896101	Unknown function
cg1327		putative transcriptional regulator, Crp-family	0.113015	0.0171885	1.34509	0.0471675	Signal transduction mechanisms
cg1328		putative copper chaperone	0.840918	0.338997	1.22602	0.0589635	Protein turnover and chaperones
cg1329	ctpC	cation transport ATPase, putative Cd2+ transporting P-type ATPase EC:3.6.3.3,	1.19585	1.75132e-293	1.25642	0.0228574	Inorganic ion transport, metabolism, and storage
cg1330		putative protein, similar to GTP pyrophosphokinase, conserved	2.19201	0.020527	0.765464	0.0633344	General function prediction only
cg1332		putative secreted hydrolase	0.485293	0.0160295	0.870067	0.296564	General function prediction only
cg1333	argS	arginyl-tRNA synthetase (EC:6.1.1.19)	0.864918	0.231658	0.799273	0.177613	Translation, ribosomal structure and biogenesis
cg1334	lysA	diaminopimelate decarboxylase (EC:4.1.1.20)	0.848197	0.160861	1.04958	0.121702	Amino acid transport and metabolism
cg1335		hypothetical protein	0.0424797	0.00235749	0.911119	0.342371	Unknown function
cg1336		putative secreted protein	0.05555	0.00286049	0.673129	0.0288497	Unknown function
cg1337	hom	homoserine dehydrogenase (EC:1.1.1.3)	0.27059	0.0162012	1.05196	0.374271	Amino acid transport and metabolism
cg1338	thrB	homoserine kinase (EC:2.7.1.39)	0.599395	0.175026	1.07087	0.243136	Amino acid transport and metabolism
cg1340	arnR	transcriptional regulator of narKGHJI and hmp	0.685631	0.0778862	0.775001	0.0065009	Signal transduction mechanisms
cg1341	narI	dissimilatory nitrate reductase, γ-subunit, cytochrome b	0.147298	0.00158276	0.997542	0.376364	Respiration and oxidative phosphorylation
cg1342	narJ	dissimilatory nitrate reductase, δ-subunit, assembly factor	0.115682	7.17198e-05	0.909805	0.206384	Respiration and oxidative phosphorylation
cg1343	narH	dissimilatory nitrate reductase, β-subunit, iron sulfur protein	0.343675	0.0580553	1.04343	0.0189071	Respiration and oxidative phosphorylation
cg1344	narG	dissimilatory nitrate reductase, α-subunit, Mo cofactor-containing	0.145998	0.00172978	1.05755	0.250561	Respiration and oxidative phosphorylation
cg1345	narK	nitrate/nitrite antiporter	0.237766	0.0477464	0.895431	0.046783	Inorganic ion transport, metabolism, and storage
cg1346	mog	putative molybdopterin biosynthesis MOG protein	0.698925	0.0168492	1.26542	0.0102964	Coenzyme transport and metabolism
cg1347		putative secreted phospholipid phosphatase	/	/	1.46198		Cell wall/membrane/envelope biogenesis
cg1348		putative membrane protein containing CBS domain	1.41755	0.128074	1.10075	0.11773	Unknown function
cg1349		putative membrane protein containing CBS domain	0.800241	0.279672	1.14208	0.105532	Unknown function
cg1350	mob	putative molybdopterin-guanine dinucleotide biosynthesis protein, homolog to mobA, required for FDH cg0618 activity	0.631578	0.0426369	1.10303	0.0563298	Coenzyme transport and metabolism
cg1351	moeA3	molybdopterin biosynthesis protein	0.260653	0.0143259	0.99198	0.425376	Coenzyme transport and metabolism
cg1352	moaA	molybdenum cofactor biosynthesis protein A	1.35945	0.0114291	1.16469	0.0178242	Coenzyme transport and metabolism
cg1353	fadD4	acyl-CoA synthase/synthetase EC:6.2.1.3	1.15654	0.00259768	1.13285	0.0519979	Lipid transport and metabolism
cg1354	rho	transcription termination factor Rho	0.657435	0.0463663	1.15603	0.215432	Transcription including sigma factors, RNA processing and modification
cg1355	prfA	peptide chain release factor 1 RF-1	0.796115	0.292592	1.2648	0.0980828	Translation, ribosomal structure and biogenesis
cg1356		putative rRNA or tRNA methylase	1.35026	0.132037	1.01694	0.193027	Translation, ribosomal structure and biogenesis
cg1358		putative translation factor SUA5, Sua5/YciO/YrdC/YwlC-family	1.69173	0.081337	0.969441	0.306619	Translation, ribosomal structure and biogenesis
cg1359		putative membrane protein, UDP-N-acetylmuramyl pentapeptide phosphotransferase/UDP-N-acetylglucosamine-1-pho	1.15717	0.0209556	1.02471	0.287169	Cell wall/membrane/envelope biogenesis
cg1360		putative membrane protein	0.670391	0.122233	1.07025	0.155742	Unknown function
cg1361	atpI	putative protein, conserved, maybe related to Mg2+ uptake	1.22906	0.174595	0.89266	0.254678	Inorganic ion transport, metabolism, and storage
cg1362	atpB	F1FO-ATP synthase, a-subunit of FO part	0.249343	0.0260701	1.14419	0.171989	Respiration and oxidative phosphorylation
cg1363	atpE	F1FO-ATP synthase, c-subunit of FO part	0.386154	0.0494607	1.3241	0.104861	Respiration and oxidative phosphorylation
cg1364	atpF	F1FO-ATP synthase, b-subunit of FO part	0.34546	0.0451149	1.31426	0.103276	Respiration and oxidative phosphorylation
cg1365	atpH	F1FO-ATP synthase, δ-subunit of F1 part	0.306299	0.035503	1.28217	0.0936782	Respiration and oxidative phosphorylation
cg1366	atpA	F1FO-ATP synthase, α-subunit of F1 part	0.506727	0.0209058	1.3025	0.0939618	Respiration and oxidative phosphorylation
cg1367	atpG	F1FO-ATP synthase, γ-subunit of F1 part	0.305363	0.0443776	1.27354	0.132639	Respiration and oxidative phosphorylation
cg1368	atpD	F1FO-ATP synthase, β-subunit of F1 part	0.715334	0.231113	1.40277	0.0555542	Respiration and oxidative phosphorylation
cg1369	atpC	F1FO-ATP synthase, ε-subunit of F1 part	0.285914	0.0591275	1.25077	0.218003	Respiration and oxidative phosphorylation
cg1370		hypothetical protein, conserved	2.17462	0.109718	0.779721	0.0428237	Unknown function
cg1371		putative nuclease of the RecB-family	1.72321	0.0693635	1.09679	0.14516	DNA replication, recombination, repair, and degradation
cg1372		hypothetical protein, conserved	0.722721	0.0822267	1.01281	0.426492	Unknown function
cg1373		putative glyoxalase/bleomycin resistance/dioxygenase superfamily protein	0.125832	3.86149e-05	1.08413	0.299108	General function prediction only
cg1374		hypothetical protein, conserved	1.07772	0.309933	1.15919	0.0443226	Unknown function
cg1375		putative thioredoxin no. 3	0.713358	0.298324	1.08492	0.0289201	General function prediction only
cg1376	ssuD1	alkanesulfonate monoxygenase, FMNH2-dependent aliphatic sulfonate monooxygenase EC:1.14.14.5, required sufficient for utilization of alkylsulfonates	3.67033	0.00646633	0.989735	0.482337	Transport and metabolism of further metabolites
cg1377	ssuC	aliphatic sulfonates transmembrane ABC transporterprotein, essential for uptake of alkylsulfonates	4.25156	0.00353751	0.952472	0.313956	Transport and metabolism of further metabolites
cg1379	ssuB	aliphatic sulfonates ATP-binding ABC transporterprotein, essential for uptake of alkylsulfonates	3.17594	0.00672264	0.926468	0.185031	Transport and metabolism of further metabolites
cg1380	ssuA	aliphatic sulfonate binding protein, essential for uptake of alkylsulfonates	2.81822	0.00114115	1.0132	0.293822	Transport and metabolism of further metabolites
cg1381	glgB	glycogen branching enzyme, 1,4-α-glucan branching enzyme EC:2.4.1.18	0.669516	0.0136713	1.3159	0.00923618	Carbon source transport and metabolism
cg1382	glgE	putative α-amylase (EC:3.2.1.1)	0.625547	0.0270954	1.10977	0.103449	Carbon source transport and metabolism
cg1383		putative ABC-type molybdenum transport system, ATPase component	0.691254	0.110955	1.08573	0.158689	Coenzyme transport and metabolism
cg1384		putative NUDIX hydrolase	1.1595	0.136081	0.940948	0.315748	General function prediction only
cg1385		putative SAM-dependent methyltransferase	0.997708	0.34109	1.07269	0.179501	General function prediction only
cg1386	etfB (fixA)	electron transfer flavoprotein, β subunit	1.52313	0.128352	0.976646	0.46086	Respiration and oxidative phosphorylation
cg1387	etfA (fixB)	electron transfer flavoprotein, α subunit	0.676667	0.158306	1.10226	0.180469	Respiration and oxidative phosphorylation
cg1388	nifS1	putative pyridoxal-phosphate-dependent aminotransferase/cysteine desulfinase, AT class IV/cysteine desulfinase (EC:2.6.1.-)	1.00564	0.400165	1.05183	0.180983	Amino acid transport and metabolism
cg1391		putative protein related to capsule biosynthesis enzyme, conserved	0.281029	0.032208	1.15014	0.100167	General function prediction only
cg1392		putative transcriptional regulator, CRO/CI-family, HTH_3-family	0.473682	0.106535	0.786937	0.00481511	Signal transduction mechanisms
cg1393		putative acetyltransferase, GNAT-family	0.17227	0.00581853	1.137	0.187799	General function prediction only
cg1394	speE2	putative spermidine synthase (EC:2.5.1.16)	0.0192624	0.0016057	0.878361	0.263814	Transport and metabolism of further metabolites
cg1395		hypothetical protein, conserved	0.086372	0.0109612	0.857641	0.250657	Unknown function
cg1396		hypothetical protein	0.688818	0.151586	1.04554	0.305464	Unknown function
cg1397	trmU	tRNA 5-methylaminomethyl-2-thiouridylate-methyltransferase EC:2.1.1.61	0.485676	0.00158539	1.10245	0.0548857	Translation, ribosomal structure and biogenesis
cg1398		hypothetical protein	0.230385	0.037001	0.900716	0.255377	Unknown function
cg1399		putative permease of the major facilitator superfamily	1.31531	0.00414071	1.13818	0.150384	General function prediction only
cg1400		putative DNA polymerase III subunit ε, Gram-positive-type α subunit, essential	2.0165	0.0326288	1.1344	0.155166	DNA replication, recombination, repair, and degradation
cg1401	ligA	DNA ligase NAD+ (EC:6.5.1.2)	1.57347	0.0592542	0.882389	0.316544	DNA replication, recombination, repair, and degradation
cg1402		hypothetical protein, conserved	0.978682	0.441626	0.918994	0.21764	Unknown function
cg1403	gatC	glutamyl-tRNA Gln amidotransferase subunit C	0.798688	0.274044	0.672535	0.0134604	Translation, ribosomal structure and biogenesis
cg1404	gatA	glutamyl-tRNA Gln amidotransferase subunit A	0.723831	0.148169	1.14421	0.0317923	Translation, ribosomal structure and biogenesis
cg1405		putative cytoplasmic siderophore-interacting protein	0.751809	0.0636313	1.03759	0.113162	Transport and metabolism of further metabolites
cg1408		putative membrane protein	1.78017	0.00166939	1.13807	0.096668	Unknown function
cg1409	pfkA (pfk)	6-phosphofructokinase EC:2.7.1.11	0.304738	0.0115396	1.35007	0.0559139	Central carbon metabolism
cg1410	rbsR	transcriptional repressor of of the ribose importer RbsACBD, LacI-family	1.36102	0.161023	0.897596	0.320398	Signal transduction mechanisms
cg1411	rbsA	ribose/xylose transporter, ABC-type sugar aldose transport system, ATPase component (TC 3.A.1.2.1)	0.875944	0.371984	1.02122	0.214971	Carbon source transport and metabolism
cg1412	rbsC	ribose/xylose transporter, ABC-type transport system, permease component (TC 3.A.1.2.1)	1.00219	0.421558	1.1448	0.0731057	Carbon source transport and metabolism
cg1413	rbsB	ribose/xylose transport, secreted sugar-binding protein (TC 3.A.1.2.1)	0.900712	0.329545	1.26779	0.0247481	Carbon source transport and metabolism
cg1414	rbsD	ribose/xylose transport system, ABC-type transport system, uncharacterized component (TC 3.A.1.2.1)	0.746548	0.0623056	1.1979	0.045398	Carbon source transport and metabolism
cg1417	act2	putative acetyltransferase	1.62068	0.0333946	0.960575	0.425149	General function prediction only
cg1418		putative secreted siderophore-binding lipoprotein	3.53057	0.0018967	1.0339	0.311908	Transport and metabolism of further metabolites
cg1419		putative Na+-dependent transporter, bile acid:Na+ symporter BASS-family	1.9396	0.005568	0.910573	0.0340075	General function prediction only
cg1420	gatB	glutamyl-tRNA Gln amidotransferase, subunit B (EC:6.3.5.-)	0.751617	0.140091	0.920366	0.107493	Translation, ribosomal structure and biogenesis
cg1421		putative dinucleotide-binding enzyme, conserved	2.05387	0.00548713	1.17758	0.159254	General function prediction only
cg1423		putative oxidoreductase related to aryl-alcohol dehydrogenase	1.75104	0.0434336	0.934445	0.238042	General function prediction only
cg1424	lysE	lysine efflux permease	3.16162	0.0735268	1.02111	0.291622	Amino acid transport and metabolism
cg1425	lysG	transcriptional regulator of lysE, LysR-family	1.42751	0.290027	0.672293	0.25486	Signal transduction mechanisms
cg1426	gst	putative glutathione S-transferase EC:2.5.1.18	0.960791	0.477094	1.10648	0.139414	Transport and metabolism of further metabolites
cg1427		putative extracellular deoxyribonuclease, conserved	0.878111	0.22493	0.761255	0.0821292	DNA replication, recombination, repair, and degradation
cg1429		putative membrane protein	1.37125	1.10589e-17	1.06238	0.111257	Unknown function
cg1432	ilvD	dihydroxy-acid dehydratase EC:4.2.1.9	1.39791	0.0513852	1.15237	0.122002	Amino acid transport and metabolism
cg1433		hypothetical protein, conserved	1.46621	0.00631299	0.824448	0.202334	Unknown function
cg1434	yggB (mscCG)	small-conductance mechanosensitive channel, MscS-family	7.55082	0.000501551	1.05505	0.24464	Amino acid transport and metabolism
cg1435	ilvB	acetolactate synthase I AHAS, large subunit EC:2.2.1.6, deletion causes isoleucine auxotrophy	1.10298	0.364741	1.0467	0.27579	Amino acid transport and metabolism
cg1436	ilvN	acetolactate synthase AHAS, small subunit EC:2.2.1.6	2.40774	0.0420324	0.906458	0.142075	Amino acid transport and metabolism
cg1437	ilvC	ketol-acid reductoisomerase	0.605872	0.112871	1.00512	0.341297	Amino acid transport and metabolism
cg1438		putative ABC-type nitrate/sulfonate/taurine/bicarbonate transport system, ATPase component C-terminal fragment	1.35182	0.00538401	0.958907	0.448659	Inorganic ion transport, metabolism, and storage
cg1440		putative ABC-type nitrate/sulfonate/taurine/bicarbonate transport system, ATPase component N-terminal fragment	0.984476	0.475803	0.854338	0.128092	Inorganic ion transport, metabolism, and storage
cg1444		putative flavin:NADH oxygenase	0.792484	0.130264	1.10792	0.0908098	General function prediction only
cg1447	zrf (czcD)	zinc exporter, cation diffusion facilitator, deletion increases zinc sensitivity	2.30551	0.00462144	1.10149	0.0302427	Inorganic ion transport, metabolism, and storage
cg1448		hypothetical protein, conserved	0.266844	0.0733155	1.12214	0.0172096	Unknown function
cg1449		hypothetical protein, conserved	1.40389	0.0302282	1.0154	0.363605	Unknown function
cg1451	serA	phosphoglycerate dehydrogenase (EC:1.1.1.95), deletion causes serin auxotrophy	0.550996	0.161751	0.859278	0.313851	Amino acid transport and metabolism
cg1452		hypothetical protein	0.300188	0.00619196	1.27128	0.00346835	Unknown function
cg1453	leuB	3-isopropylmalate dehydrogenase (EC:1.1.1.85)	0.670946	0.0304514	1.0786	0.0119377	Amino acid transport and metabolism
cg1454		putative aliphatic sulfonates uptake ABC transporter secreted solute-binding protein	0.0932884	0.0689893	1.03882	0.410515	Transport and metabolism of further metabolites
cg1456		putative signal-transduction protein containing cAMP-binding and CBS domain, conserved	0.238105	0.00186924	0.984316	0.482271	Signal transduction mechanisms
cg1457	dnaQ2	putative DNA polymerase III, ε subunit (EC:2.7.7.7)	0.295168	0.00287246	1.19286	0.124696	DNA replication, recombination, repair, and degradation
cg1458	odx	oxaloacetate decarboxylase	0.79369	0.110787	1.08362	0.0941007	Central carbon metabolism
cg1459		putative SAM-dependent methyltransferase	1.07059	0.332984	1.03611	0.387894	General function prediction only
cg1462	menF (entC)	isochorismate synthase (EC:5.4.4.2), involved in menaquinone biosynthesis	0.581869	0.0491703	0.902046	0.20219	Coenzyme transport and metabolism
cg1463	gltS (gltX, not cg289)	glutamyl-tRNA synthetase (EC:6.1.1.17)	0.87837	0.36919	1.0943	0.0112467	Translation, ribosomal structure and biogenesis
cg1464		putative transcriptional regulator, HTH_3-family	1.57296	0.0473918	0.950026	0.0523644	Signal transduction mechanisms
cg1465		putative membrane protein	1.15902	0.24738	0.932771	0.249382	Unknown function
cg1466		putative secreted protein	0.832372	0.245483	0.991167	0.477283	Unknown function
cg1467		putative transcriptional regulator, TetR-family	2.57193	0.0116454	0.796309	0.164384	Signal transduction mechanisms
cg1468		hypothetical protein, conserved	1.3265		0.753559	0.00938901	Unknown function
cg1469		putative secreted protein	/	/	1.51976		Unknown function
cg1471		hypothetical protein	3.40559	0.139135	1.12842	0.107218	Unknown function
cg1474		putative ATP/GTP-binding protein, large untranslated regions besides	1.45415	0.0351266	0.962721	0.300364	General function prediction only
cg1475		hypothetical protein, conserved	1.12993	0.139761	1.10335	0.246286	Unknown function
cg1476	thiC	thiamine biosynthesis protein ThiC	0.554021	0.0869949	1.27599	0.107924	Coenzyme transport and metabolism
cg1478		hypothetical protein	3.07913	0.0469307	1.06063	0.0788153	Unknown function
cg1479	malP (glgP1)	maltodextrin phosphorylase	0.595282	0.0578231	1.15346	0.0758346	Carbon source transport and metabolism
cg1481		hypothetical protein, conserved	1.59084	0.00620775	1.38609	0.0213394	Unknown function
cg1482		putative Zn-dependent hydrolase, including glyoxylases	1.64672	0.023511	1.49455	0.00199823	General function prediction only
cg1483		putative membrane protein	0.728091	3.71925e-15	1.37173	0.0240519	Unknown function
cg1484		putative secreted protein	0.137797	0.0020124	1.63505	0.00913401	Unknown function
cg1485		putative metal dependent phosphohydrolase, RelA/SpoT homolog	0.577841	0.0225584	0.902407	0.258355	General function prediction only
cg1486	ltbR	leucine and tryptophan biosynthesis regulator, transcriptional repressor, IclR-family	0.494175	0.00267572	0.644282	0.11263	Signal transduction mechanisms
cg1487	leuC	isopropylmalate isomerase large subunit (EC:4.2.1.33)	0.147238	0.00222545	0.891914	0.0915911	Amino acid transport and metabolism
cg1488	leuD	isopropylmalate isomerase small subunit (EC:4.2.1.33)	0.253595	0.00449484	1.05045	0.231594	Amino acid transport and metabolism
cg1490		putative NTP pyrophosphohydrolase including oxidative damage repair enzyme	1.1455	0.037776	1.07902	0.12124	DNA replication, recombination, repair, and degradation
cg1491		hypothetical protein	/	/	1.24255		Unknown function
cg1492	gpsA	NADPH-dependent glycerol-3-phosphate dehydrogenase (EC:1.1.1.94)	0.684027	0.153085	1.0698	0.342907	Central carbon metabolism
cg1493	ddl	D-alanylalanine synthetase, D-alanine-D-alanine ligase A (EC:6.3.2.4)	0.910378	0.381169	1.17331	0.0231221	Cell wall/membrane/envelope biogenesis
cg1494		putative secreted protein	0.831792	0.293741	1.23754	0.0240822	Unknown function
cg1495	thiL	thiamine monophosphate kinase EC:2.7.4.16	1.65734	0.158388	0.982089	0.461629	Coenzyme transport and metabolism
cg1496	ung	uracil-DNA glycosylase EC:3.2.2.-	1.25545	0.175635	1.1959	0.0416315	DNA replication, recombination, repair, and degradation
cg1497		putative kinase related to dihydroxyacetone kinase	0.538154	0.0186952	0.931877	0.0985901	General function prediction only
cg1498		putative RecG-like helicase	0.512106	0.122965	0.920924	0.281939	DNA replication, recombination, repair, and degradation
cg1499		putative protein, similarity to biotin carboxyl carrier protein, conserved	0.931978	0.418755	0.853311	0.150989	General function prediction only
cg1500		putative N6-adenine-specific methylase	0.907291	0.24127	0.888615	0.118514	General function prediction only
cg1501	coaD	phosphopantetheine adenylyltransferase (EC:2.7.7.3)	1.28741	0.0527163	1.0728	0.0314084	Coenzyme transport and metabolism
cg1502		putative ABC-type polar amino acid transport system, ATPase component	1.34507	0.076343	1.29226	0.00425923	Amino acid transport and metabolism
cg1503		putative ABC-type amino acid transport system, permease component	0.905429	0.0919491	1.12823	0.145225	Amino acid transport and metabolism
cg1504		putative ABC-type amino acid transport system, secreted component	0.93284	0.0853492	0.838902	0.125833	Amino acid transport and metabolism
cg1505		putative secreted protein	0.439592	0.00486249	1.00775	0.442726	Unknown function
cg1506		putative membrane protein	0.228656	0.0116276	0.908438	0.21686	Unknown function
cg1507	int1	putative phage-type integrase CGP1 region	/	/	1.03364	8.24268e-226	Prophage genes, DNA replication, recombination and repair
cg1508		putative pseudogene - similar to Psp1 CGP1 region	1.61157	0.0421897	1.04893	0.235769	Prophage genes
cg1509		hypothetical protein CGP1 region	1.44053	0.0371838	0.773747	0.00112901	Prophage genes
cg1510		hypothetical protein, conserved CGP1 region	1.04233	0.408655	0.899846	0.118315	Prophage genes
cg1511		hypothetical protein CGP1 region	1.15243	0.363816	0.875318	0.0977198	Prophage genes
cg1512		hypothetical protein CGP1 region	1.02718	0.317778	0.826757	0.0790708	Prophage genes
cg1513	tnp23a	transposase, putative pseudogene CGP1 region	0.531543	0.0575785	1.33805	1.49132e-15	Prophage genes, DNA replication, recombination and repair
cg1514		putative secreted protein CGP1 region	0.551005	0.0541598	1.33378	0.147979	Prophage genes
cg1515	tnp24a	transposase, putative pseudogene CGP1 region	0.759022	0.024107	1.03399	0.331918	Prophage genes, DNA replication, recombination and repair
cg1516		hypothetical protein CGP1 region	0.227566	0.0837432	1.15774	0.174976	Prophage genes
cg1517		putative secreted protein CGP1 region	0.297159	0.00682572	1.31438	0.00212598	Prophage genes
cg1518		hypothetical protein CGP1 region	1.32846	0.120784	1.11833	0.098636	Prophage genes
cg1519		hypothetical protein CGP1 region	1.89665	0.110492	1.01748	0.315212	Prophage genes
cg1520		putative secreted protein CGP1 region	3.14381	0.107808	0.873873	0.315447	Prophage genes
cg1521		putative membrane protein CGP1 region	2.1044	0.00121852	0.641448	0.0404643	Prophage genes
cg1522		putative membrane protein CGP1 region	1.86347	0.0880127	0.606372	0.114493	Prophage genes
cg1523		hypothetical protein, conserved CGP1 region	1.66922	0.0181727	0.81369	0.0166567	Prophage genes
cg1524		putative membrane protein CGP1 region	2.12086	0.104836	0.712168	0.143049	Prophage genes
cg1525	polA	DNA polymerase I EC:2.7.7.7, essential	1.64948	0.0475045	1.11549	0.067771	DNA replication, recombination, repair, and degradation
cg1526		putative multidrug efflux permease of the major facilitator superfamily	/	/	0.967319	0.471972	General function prediction only
cg1527		putative transcriptional regulator, HTH_3-family	2.51393	0.010594	0.934934	0.352096	Signal transduction mechanisms
cg1528	dkgX	putative 2,5-diketo-D-gluconic acid reductase	2.22171	0.0254517	1.40458	0.0338415	Carbon source transport and metabolism
cg1530		putative SAM-dependent methyltransferase	0.504846	0.0289146	1.01971	0.391037	General function prediction only
cg1531	rpsA	30S ribosomal protein S1, conserved	0.784017	0.279936	0.939556	0.33217	Translation, ribosomal structure and biogenesis
cg1537	ptsG	glucose-specific EIIABC component EIIGlc of PTS EC:2.7.1.69 fructose-specific enzyme II BC (EIIFru) component of PTS (EC:2.7.1.69)	1.56072	0.157665	1.1868	0.0951515	Carbon source transport and metabolism; signal transduction mechanisms
cg1538	coaE	dephospho-CoA kinase (EC:2.7.1.24)	1.18953	0.244667	1.10799	0.139244	Coenzyme transport and metabolism
cg1540		putative secreted protein	1.57341	0.023613	1.32011	0.048215	Unknown function
cg1541		putative pseudogene, conserved protein	2.3982	0.126416	1.08636	0.0652535	Unknown function
cg1542		putative membrane protein	2.78912	0.046136	0.933325	0.149003	Unknown function
cg1543	uriH (iunH3)	inosine-uridine preferring nucleoside hydrolase	1.09166	0.290676	1.20897	0.0110722	Nucleotide transport and metabolism
cg1545	uriT	permease of the major facilitator superfamily	2.87443	0.150577	1.32668	0.0798127	General function prediction only
cg1546	rbsK1	putative ribokinase protein (EC:2.7.1.15)	0.823246	0.0268246	1.1659	0.10984	Nucleotide transport and metabolism
cg1547	uriR	transcriptional regulator of uridine utilization and ribose transport, LacI-family, structure is known (pdb 3BIL)	1.15833	0.307836	1.087	0.10542	Signal transduction mechanisms
cg1548		hypothetical protein, conserved	1.86742	0.00656165	1.02974	0.199909	Unknown function
cg1549		hypothetical protein	1.70061	0.0241518	1.22947	0.024253	Unknown function
cg1550	uvrB	excinuclease ABC subunit B, important role in DNA-repair	1.278	0.167441	1.16167	0.0765678	DNA replication, recombination, repair, and degradation
cg1551	uspA1	universal stress protein no.1, nucleotide-binding proteins	4.06413	0.0329756	1.04062	0.351506	DNA replication, recombination, repair, and degradation
cg1552	qorR	redox-sensing transcriptional regulator disulfide-stress response, repressor of quinone oxidoreductase qor2	0.601453	0.146118	0.721581	0.0406673	Signal transduction mechanisms
cg1553	qor2	Quinone oxidoreductase, involve in disulfide stress response	2.63485	0.00226311	1.13883	0.0323958	Post-translational modification
cg1555		putative superfamily I DNA or RNA helicase	2.55204	0.0137899	1.06314	0.234261	DNA replication, recombination, repair, and degradation; Transcription including sigma factors, RNA processing and modification
cg1556		hypothetical protein, conserved	2.05809	0.0172914	1.12918	0.134939	Unknown function
cg1559		putative Zn-dependent hydrolase	3.53179	0.000306586	1.13106	0.0357519	General function prediction only
cg1560	uvrA	excinuclease ABC subunit A	2.59987	0.0264972	1.1525	0.205077	DNA replication, recombination, repair, and degradation
cg1562		putative membrane protein	0.043328	0.0114359	1.3148	0.0521543	Unknown function
cg1563	infC	translation initiation factor IF-3	0.680672	0.00586549	0.860532	0.18666	Translation, ribosomal structure and biogenesis
cg1564	rpmI	50S ribosomal protein L35	0.702155	0.0737889	0.872471	0.0724897	Translation, ribosomal structure and biogenesis
cg1565	rplT	50S ribosomal protein L20	0.515138	0.059978	0.967013	0.378528	Translation, ribosomal structure and biogenesis
cg1566		hypothetical protein	3.42218	0.158248	0.849354	0.135137	Unknown function
cg1567		hypothetical protein	1.73589	0.0469527	0.954087	0.414173	Unknown function
cg1568	ugpA	ABC-type sn-glycerol-3-phosphate transport system, permease protein, presumably regulated by RegX3	0.926486	0.399726	0.886955	0.0201934	Carbon source transport and metabolism
cg1570	ugpB	ABC-type sn-glycerol-3-phosphate transport system, secreted sn-glycerol-3-phosphate-binding protein	2.21295	0.181872	0.913736	0.175948	Carbon source transport and metabolism
cg1571	ugpC	ABC-type sn-glycerol-3-phosphate transport system, ATPase component	1.32534	0.0358796	1.24285	0.137384	Carbon source transport and metabolism
cg1572	glpQ2	putative glycerophosphoryl diester phosphodiesterase 2 (EC:3.1.4.46)	1.56422	0.0311823	1.05578	0.26874	Carbon source transport and metabolism
cg1573	tsnR	23S ribosomal RNA methyltransferase (EC:2.1.1.34)	1.14294	0.179018	0.954733	0.393074	Translation, ribosomal structure and biogenesis
cg1574	pheS	phenylalanyl-tRNA synthetase α subunit (EC:6.1.1.20)	1.25668	0.0470622	0.887282	0.258393	Translation, ribosomal structure and biogenesis
cg1575	pheT	phenylalanyl-tRNA synthetase β subunit (EC:6.1.1.20)	0.924408	0.17693	1.14271	0.0508403	Translation, ribosomal structure and biogenesis
cg1577		putative secreted hydrolase	0.0725837	0.000187095	1.01433	0.417731	General function prediction only
cg1578		putative acyltransferase-family, membrane protein	0.0915653	0.00546471	1.17472	0.0412531	General function prediction only
cg1579		putative secreted protein	0.185244	0.0029365	1.15842	0.123847	Unknown function
cg1580	argC	N-acetyl-γ-glutamyl-phosphate reductase (EC:1.2.1.38)	0.834087	0.174502	0.940642	0.0482117	Amino acid transport and metabolism
cg1581	argJ	monofunctional NAGS N-acetyl glutamate synthase,catalyzes fifth step of arginine biosynthesis (EC:2.3.1.35)	0.895498	0.25065	1.07898	0.171271	Amino acid transport and metabolism
cg1582	argB	acetylglutamate kinase (EC:2.7.2.8)	0.954882	0.419779	1.02597	0.32738	Amino acid transport and metabolism
cg1583	argD	acetylornithine aminotransferase, AT class II (EC:2.6.1.11)	0.95172	0.423118	1.06244	0.164336	Amino acid transport and metabolism
cg1584	argF	ornithine carbamoyltransferase	1.27239	0.0782322	0.982933	0.482265	Amino acid transport and metabolism
cg1585	argR	transcriptional repressor of arginine biosynthesis, ArgR-family	0.775512	0.0883876	1.054	0.290214	Signal transduction mechanisms
cg1586	argG	argininosuccinate synthase (EC:6.3.4.5)	0.592463	0.0215661	1.05658	0.238559	Amino acid transport and metabolism
cg1588	argH	argininosuccinate lyase (EC:4.3.2.1)	0.574155	0.0285511	1.1606	0.0870308	Amino acid transport and metabolism
cg1589		putative secreted protein	1.03549	0.4554	0.925644	0.090827	Unknown function
cg1590		putative secreted Mg-chelatase subunit, conserved	3.88053	0.078775	1.1083	0.0900588	Inorganic ion transport, metabolism, and storage
cg1591		putative secreted protein	1.70985	0.0337629	0.924269	0.0376867	Unknown function
cg1592		hypothetical protein, conserved	0.61628	0.0139529	0.814138	0.0826694	Unknown function
cg1594	tyrS	tyrosyl-tRNA synthetase (EC:6.1.1.1)	1.41077	0.245289	0.990708	0.488106	Translation, ribosomal structure and biogenesis
cg1595	uspA2	universal stress protein no. 2, nucleotide-binding protein	0.541924	0.231002	1.04792	0.377237	Unknown function
cg1597		hypothetical protein, conserved	0.789311	0.175939	1.18463	0.00951382	Unknown function
cg1598		putative sugar phosphatase of the HAD superfamily	1.139	0.108794	1.06679	0.168786	General function prediction only
cg1599		hypothetical protein	1.09912	0.051286	1.12035	0.168199	Unknown function
cg1600		putative rRNA methylase, conserved	0.777981	0.180926	1.09364	0.114937	Translation, ribosomal structure and biogenesis
cg1601	ppnK	inorganic polyphosphate/ATP-NAD kinase (EC:2.7.1.23)	1.36418	0.0389571	1.05868	0.364219	Coenzyme transport and metabolism
cg1602	recN	DNA repair protein	19.2112	0.00022808	0.855272	0.0108441	DNA replication, recombination, repair, and degradation
cg1603		hypothetical protein, conserved	0.928455	0.233445	1.1719	0.0388076	Unknown function
cg1604		putative porin, Ortholog of M. tub. outer membrane protein, secreted protein, putative channel protein similar to Rv1698	0.626105	0.196698	1.14811	0.134735	General function prediction only
cg1606	pyrG	CTP synthetase (EC:6.3.4.2)	2.30185	0.0240576	1.22477	0.00630924	Nucleotide transport and metabolism
cg1607		putative NTP pyrophosphohydrolase including oxidative damage repair enzyme	1.50276	0.0269737	1.16811	0.0169476	DNA replication, recombination, repair, and degradation
cg1608	xerD	tyrosine recombinase	1.15024	0.301645	1.10868	0.0542297	DNA replication, recombination, repair, and degradation
cg1609		putative ATPase component of antibiotics ABC transporter with duplicated ATPase domains	1.60721	0.171803	1.03867	0.301953	Transport and metabolism of further metabolites
cg1610	parA2	putative chromosome partitioning ATPase protein	0.848483	0.0152383	1.1219	0.236368	Cell division, chromosome partitioning
cg1611	scpA	putative segregation and condensation protein A	0.660266	0.0669474	0.93562	0.312882	Cell division, chromosome partitioning
cg1612		putative acetyltransferase	0.176083	0.0172988	0.903952	0.247968	General function prediction only
cg1613	sseA2	rhodanese-related sulfurtransferase (EC:2.8.1.1)	0.694516	0.0143364	0.953972	0.0888163	Inorganic ion transport, metabolism, and storage
cg1614	scpB	putative segregation and condensation protein B	0.635541	0.131128	0.901443	0.000636662	Cell division, chromosome partitioning
cg1615	rluA	putative 16S rRNA uridine-516 pseudouridylate synthase or related pseudouridylate synthase	0.646593	0.0268183	1.07983	0.199866	Translation, ribosomal structure and biogenesis
cg1616	cmk	cytidylate kinase EC:2.7.4.14	0.497615	0.0171482	1.12765	0.177181	Nucleotide transport and metabolism
cg1617		putative GTP-binding protein EngA	0.695571	0.0136165	1.2864	0.00363596	General function prediction only
cg1618		hypothetical protein, conserved	2.19233	0.00633965	1.0219	0.37161	Unknown function
cg1619		putative DNA gyrase inhibitor or transcriptional regulator, AraC-family	5.10703	0.108711	1.00421	0.367346	Transcription including sigma factors, RNA processing and modification
cg1620		putative SAM-dependent methyltransferase	0.758873	0.195191	1.02755	0.358001	General function prediction only
cg1621		putative ABC-type multidrug/protein/lipid transport system, ATPase component	0.935507	0.478006	1.11314	0.241284	General function prediction only
cg1622		putative ABC-type multidrug/protein/lipid transport system, ATPase component	0.835912	0.118048	1.16467	0.101867	General function prediction only
cg1623	mntT	putative manganese transporter, ZIP family metal transporter	1.01813	0.304364	0.929931	0.202723	Inorganic ion transport, metabolism, and storage
cg1624	nhaP	Na+ K+/H+ antiporter	2.75339	0.1222	1.12332	0.0557199	Inorganic ion transport, metabolism, and storage
cg1625		hypothetical protein	0.904955	0.115701	0.814201	0.218378	Unknown function
cg1626		hypothetical protein, conserved	4.81665	0.000125803	1.46303	0.0160921	Unknown function
cg1628		putative hydrolase of the α/β superfamily	13.6901	0.00197089	1.48384	0.0576489	General function prediction only
cg1629	secA2	preprotein translocase subunit SecA2, essential	1.06635	0.106709	0.728655	0.110413	Protein secretion
cg1630	odhI	oxoglutarate dehydrogenase inhibitor protein, essential for glutamine utilization, regulates ODH activity	1.88999	0.0491916	1.14392	0.0532638	Signal transduction mechanisms
cg1631		putative transcriptional regulator, MerR-family	1.17069	0.175863	0.934599	0.189931	Signal transduction mechanisms
cg1632		hypothetical protein, conserved	1.02052	0.261101	0.973819	0.365816	Unknown function
cg1633		putative transcriptional regulator, MerR-family	1.02859	0.375048	1.03146	0.303933	Signal transduction mechanisms
cg1635		putative membrane protein	1.05001	0.273275	1.18094	0.022421	Unknown function
cg1636		putative secreted protein	0.921024	0.417123	0.808397	0.134701	Unknown function
cg1638		hypothetical protein, conserved	0.374784	0.0540465	1.08312	0.184131	Unknown function
cg1639		putative membrane protein containing CBS domain	1.16266	0.102043	1.29291	0.00653298	Unknown function
cg1640		putative membrane protein containing CBS domain	0.866788	0.235304	1.01709	0.298878	Unknown function
cg1641		putative superfamily II DNA or RNA helicase	1.37722	0.134284	1.1157	0.20567	General function prediction only
cg1642		putative cytoplasmic siderophore-interacting protein	/	/	1.29127	0.214434	Transport and metabolism of further metabolites
cg1643	gnd	6-phosphogluconate dehydrogenase (EC:1.1.1.44)	0.790334	0.173941	1.23955	0.139604	Central carbon metabolism
cg1644		putative protein, possibly involved in aromatic compounds catabolism	0.398097	0.0144409	0.913451	0.274944	Amino acid transport and metabolism
cg1645		putative SAM-dependent methyltransferase	0.945059	0.443228	1.2818	0.0798143	General function prediction only
cg1646		putative ABC-type multidrug transport system, ATPase component	1.1004	0.252083	1.24255	0.00483403	General function prediction only
cg1647		putative ABC-type multidrug transport system, permease component	1.65614	0.161568	1.29442	0.0474191	General function prediction only
cg1648	pctR (rpiR)	transcriptional regulator, RpiR-family	0.98239	0.477503	1.11036	0.121666	Signal transduction mechanisms
cg1649	pctD	ABC-type phosphate/phosphonate transport system, permease component (TC 3.A.1.9.1)	12.1956		1.20169	0.0277494	Transport and metabolism of further metabolites
cg1650	pctC	ABC-type phosphate/phosphonate transport system, permease component (TC 3.A.1.9.1)	1.05083	0.454804	1.1578	0.0546697	Transport and metabolism of further metabolites
cg1651	pctB	ABC-type phosphate/phosphonate transport system, ATPase component (TC 3.A.1.9.1)	/	/	1.1036	0.146469	Transport and metabolism of further metabolites
cg1652	pctA	alkylphosphonate ABC tranporter secreted phosphate-binding protein (TC 3.A.1.9.1)	/	/	1.05682	0.423999	Transport and metabolism of further metabolites
cg1653	pctH (pgp1)	putative phosphoglycolate phosphatase, putative phosphonate hydrolase	1.89397	0.129539	1.31393	0.048549	Transport and metabolism of further metabolites
cg1654	thiD1	thiamine-phosphate pyrophosphorylase	0.889862	0.310108	1.13105	0.0585842	Coenzyme transport and metabolism
cg1655	thiM	hydroxyethylthiazole kinase (EC:2.7.1.50)	1.78768	0.235922	1.22103	0.101555	Coenzyme transport and metabolism
cg1656	ndh	NADH dehydrogenase type II, NDH-II (EC:1.6.99.3), not essential, non-proton pumping	1.01834	0.406611	1.14571	0.0658326	Respiration and oxidative phosphorylation
cg1657	ufaA	putative cyclopropane fatty acid synthase cyclopropane-fatty-acyl-phospholipid synthase	0.965078	0.419531	0.896715	0.197502	Cell wall/membrane/envelope biogenesis
cg1658		putative permease of the major facilitator superfamily	2.86981	0.000755036	0.836859	0.0187764	General function prediction only
cg1659	gpt	purine phosphoribosyltransferase (EC:2.4.2.-)	1.86494	0.089925	0.939433	0.166406	Nucleotide transport and metabolism
cg1660		putative membrane protein	1.56592	0.016449	0.776245	0.0982523	Unknown function
cg1661	arsB3	additional arsenite permease, arsenical resistance-3 ACR3-family	1.56197	0.0459891	0.806739	0.0591518	Inorganic ion transport, metabolism, and storage
cg1662		putative secreted protein	3.74146	0.0236525	0.969022	0.427741	Unknown function
cg1663		hypothetical protein, conserved	1.95477	0.0139454	1.12435	0.177436	Unknown function
cg1664		putative sulfate permease or related transporter MFS superfamily, SulP-family	0.853264	0.100772	1.33904	0.0196621	General function prediction only
cg1665		putative secreted protein	0.128301	0.0573588	1.50071	0.0123464	Unknown function
cg1668		putative membrane protein	1.00755	0.38297	1.15355	0.111706	Unknown function
cg1669		putative secreted protein	1.54619	0.093785	1.02254	0.394478	Unknown function
cg1670		hypothetical protein, conserved	0.899343	0.194978	0.949681	0.373726	Unknown function
cg1671		putative membrane-associated GTPase	1.52251	0.29539	1.13054	0.366737	Unknown function
cg1672	ppmC (ppm1)	polyprenol-phosphate-mannose synthase domain 1 (EC:2.3.1.-)	0.957513	0.465497	1.0505	0.0333281	Cell wall/membrane/envelope biogenesis
cg1673	ppmN (ppm2)	Polyprenol-phosphate-mannose synthase domain 2 (EC:2.3.1.-), ortholog of mycobacterium MSMEG_3860	2.74156	0.00266396	1.08555	0.181455	Cell wall/membrane/envelope biogenesis
cg1675		putative membrane protein	2.16815	0.00857275	1.06897	0.0806907	Unknown function
cg1676	lip3	putative lipase EC:3.1.1.3	1.47464	0.0642684	1.09398	0.190997	Lipid transport and metabolism
cg1677	cobG	putative vitamin B12 synthesis COBG-related protein, conserved	0.687677	0.0515552	1.01347	0.290676	Coenzyme transport and metabolism
cg1678	cobL	precorrin-6Y C5,15-methyltransferase decarboxylating EC:2.1.1.132	0.649502	0.0110233	0.976816	0.371151	Coenzyme transport and metabolism
cg1680		putative short-chain dehydrogenase/reductase	0.587281	0.0342656	1.24261	0.0161325	General function prediction only
cg1681	pepE (pepQ?)	proline dipeptidase (EC:3.4.13.9)	0.803246	0.180698	1.10726	0.0131764	Protein turnover and chaperones
cg1682		putative trypsin-like serine protease	0.670125	0.195709	0.920615	0.336963	Protein turnover and chaperones
cg1683		putative superfamily II DNA and RNA helicase	0.356625	0.149127	1.26156	0.112507	General function prediction only
cg1684	tatC	twin argininte translocase protein C	2.67666	0.00985527	0.957367	0.421568	Protein secretion
cg1685	tatA	twin argininte translocase protein A	1.48691	0.0337894	0.659201	0.0510516	Protein secretion
cg1686	pafC	putative transcriptional regulator of pup operon cg1689-1688, PafC homolog	1.28173	0.0952506	1.1871	0.0237816	Signal transduction mechanisms
cg1687	pafB	putative transcriptional regulator of pup operon cg1689-1688, PafB homolog	1.78345	0.218719	0.821589	0.0403408	Signal transduction mechanisms
cg1688	pafA (pafA2)	Proteasome accessory factor A (Pup ligase), forms isopeptide bond between C-terminal Glu of Pup and target protein Lys	1.216	0.196783	0.999461	0.446473	Post-translational modification
cg1689	pup	prokaryotic ubiquitin-like protein	0.975598	0.47926	1.00058	0.452768	Post-translational modification
cg1690	dop (pafA1)	depupylase of pupylated proteins	0.974738	0.483797	1.1831	0.0770907	Post-translational modification
cg1691	arc (mpa)	AAA+ ATPase forming ring-shaped complexes, recognizes pupylated proteins, homolog in M. tuberculosis interacts with proteasome	1.35855	0.21214	1.1819	0.0102939	Post-translational modification; Protein turnover and chaperones
cg1692	pimT	SAM-dependent methyltransferase involved in tRNA-Met maturation	2.85868	0.0952184	1.11449	0.0894707	Translation, ribosomal structure and biogenesis
cg1693	pepC	putative aminopeptidase 2, Aspartyl aminopeptidase (EC:3.4.11.-)	1.78543	0.0283788	1.09565	0.192032	Protein turnover and chaperones
cg1694	recB	RecB-family exonuclease	0.956498	0.469398	0.944901	0.160128	DNA replication, recombination, repair, and degradation
cg1695		putative plasmid maintenance system antidote protein, HTH-motif XRE-family	0.380331	0.00106274	0.853032	0.022148	General function prediction only
cg1696		putative antibiotic efflux permease of the major facilitator superfamily	0.105898	0.024032	1.01335	0.448999	General function prediction only
cg1697	aspA	aspartate ammonia-lyase aspartase EC:4.3.1.1	0.430892	0.0081909	0.807558	0.0970713	Amino acid transport and metabolism
cg1698	hisG	ATP phosphoribosyltransferase EC:2.4.2.17	0.357006	0.135685	0.779751	0.0722834	Amino acid transport and metabolism
cg1699	hisE	phosphoribosyl-ATP pyrophosphatase EC:3.6.1.31	0.12887	0.00436689	0.785556	0.050766	Amino acid transport and metabolism
cg1700		putative phosphatase/phosphohexomutase	1.74232	0.0381593	1.05691	0.0491361	General function prediction only
cg1701	metH	homocysteine methyltransferase, methionine synthase EC:2.1.1.13	0.975747	0.477755	0.995606	0.459247	Amino acid transport and metabolism
cg1702		hypothetical protein	1.96463	0.0291629	1.01651	0.411438	Unknown function
cg1703		putative FAD-dependent pyridine nucleotide-disulphide oxidoreductase	2.21226	0.0447444	1.02879	0.386416	General function prediction only
cg1704	arsR1	arsenate/arsenite transcriptional regulator, ArsR-family, function predicted, experimentally proven?	1.43572	0.00546175	1.06977	0.302191	Inorganic ion transport, metabolism, and storage
cg1705	arsB1 (arsC2)	arsenite permease, arsenical resistance-3 ACR3-family	1.90356	0.156926	1.09649	0.270238	Inorganic ion transport, metabolism, and storage
cg1706	arsC1	arsenate reductase, arsenical pump modifier (EC:1.20.4.1)	1.65731	0.0206164	1.21148	0.0093174	Inorganic ion transport, metabolism, and storage
cg1707	arsC1	arsenate reductase, downstream of arsC1 arsenical pump modifier	2.57166	0.0322546	1.22592	0.0159218	Inorganic ion transport, metabolism, and storage
cg1708		hypothetical protein, conserved	0.127569	0.0154451	1.09881	0.232754	Unknown function
cg1709	mshC	ligase, cysteinyl-tRNA synthetase, 1-D-myo-inosityl-2-amino-2-deoxy-α-D-glucopyranoside-L-cysteine ligase (EC:6.3.2.-), deletion: increased sensitivity against alkylating agents	0.785138	0.136935	1.21826	0.0273073	Transport and metabolism of further metabolites
cg1710	uppP (bacA)	undecaprenyl pyrophosphate phosphatase (EC:2.7.1.66)	1.28772	0.209706	1.08663	0.199389	Cell wall/membrane/envelope biogenesis
cg1711		putative oxidoreductase	0.713508	0.229231	1.1373	0.0428394	General function prediction only
cg1712	lppL	secreted lipoprotein	0.92991	0.459753	0.995219	0.440669	Cell wall/membrane/envelope biogenesis
cg1713	pyrD	dihydroorotate dehydrogenase (EC:1.3.3.1)	0.848022	0.261562	1.25323	0.00290071	Nucleotide transport and metabolism
cg1714		hypothetical protein	2.43095		0.828983	0.113879	Unknown function
cg1715		hypothetical protein	1.16891	0.341297	1.08353	0.294282	Unknown function
cg1716	tnp16b	transposase	0.683658	0.357629	1.13448	0.241519	DNA replication, recombination, repair, and degradation
cg1717		putative membrane protein	0.565274	0.155474	1.12445	0.144253	Unknown function
cg1718		putative phospholipid-binding protein	0.0892457	0.133354	1.36759	0.0121342	Unknown function
cg1719	tetB	ABC-type multidrug/protein/lipid transport system, ATPase component	0.305549	0.235585	1.2057	0.130668	Transport and metabolism of further metabolites
cg1720	tetA	ABC-type multidrug/protein/lipid transport system, ATPase component	0.726251	0.0901996	1.10128	0.101905	Transport and metabolism of further metabolites
cg1722	act3	putative N-acetylglutamate synthase activity, complements arginine-auxotrophic argJ strain	1.16833	0.0442505	0.966898	0.340669	Amino acid transport and metabolism
cg1724	meaB	accessory protein of methylmalonylCoA mutase	0.136773	0.00507918	1.07335	0.0715974	Amino acid transport and metabolism; Lipid transport and metabolism
cg1725	mutA (mcmB)	methylmalonyl-CoA mutase, α subunit (EC:5.4.99.2)	0.28253	0.0563741	1.18499	0.100614	Amino acid transport and metabolism; Lipid transport and metabolism
cg1726	mutB (mcmA)	methylmalonyl-CoA mutase, β subunit (EC:5.4.99.2)	0.210448	0.00361449	0.975178	0.444638	Amino acid transport and metabolism; Lipid transport and metabolism
cg1727		putative membrane protein	0.4835	0.00412951	0.75219	0.0454299	Unknown function
cg1728		hypothetical protein, conserved	0.828446	0.240241	0.91001	0.10532	Unknown function
cg1730		putative secreted protease subunit, stomatin/prohibitin homolog	0.98334	0.485535	1.14571	0.0715736	Protein turnover and chaperones
cg1731		putative membrane protein implicated in regulation of membrane protease activity	0.991738	0.461796	1.23259	0.0461422	Protein turnover and chaperones
cg1732		hypothetical protein, conserved	1.8937	0.0482284	1.06312	0.259544	Unknown function
cg1733		hypothetical protein, conserved	1.49574	0.00388242	1.05249	0.0774306	Unknown function
cg1734	hemH	ferrochelatase (EC:4.99.1.1), essential	1.73007	0.0360108	0.955681	0.215404	Transport and metabolism of further metabolites
cg1735		secreted cell wall-associated hydrolase; may be involved in peptidoglycan maintenance	1.21268	0.0876411	0.633003	0.00532991	Cell wall/membrane/envelope biogenesis
cg1736		putative membrane protein	0.812722	0.295458	0.941152	0.271612	Unknown function
cg1737	acn	aconitase aconitate hydratase (EC:4.2.1.3), loss results in glutamate/glutamine auxotrophy	0.557092	0.0359263	1.14118	0.0810177	Central carbon metabolism
cg1738	acnR	transcriptional regulator, represses aconitase, TetR-family	0.514932	0.00515237	0.947131	0.088352	Signal transduction mechanisms
cg1739	gat	glutamine amidotransferase, conserved	0.590271	0.0419325	0.743158	0.149585	Amino acid transport and metabolism; Nucleotide transport and metabolism; Coenzyme transport and metabolism
cg1740		putative nucleoside-diphosphate-sugar epimerase	1.80398	0.020499	1.0507	0.363001	Nucleotide transport and metabolism
cg1741		putative membrane protein	0.927983	0.418258	1.12233	0.100023	Unknown function
cg1742		putative ACT domain-containing protein, conserved	3.28777	0.0355571	1.16944	0.16441	Unknown function
cg1743		hypothetical protein, conserved	1.66881	0.0241062	1.22356	0.0282326	Unknown function
cg1744	pacL	cation-transporting ATPase, maybe involved in folate or lipopolysaccharide biosynthesis, Starch and sucrose metabolism	2.05447	0.00935364	1.33016	0.0290012	Inorganic ion transport, metabolism, and storage
cg1745		putative signal recognition particle GTPase, conserved	1.02848	0.427004	0.874918	0.210066	Signal transduction mechanisms
cg1746		putative membrane protein CGP2 region	0.215898	0.00783984	1.23135	0.0171674	Prophage genes
cg1750		hypothetical protein conserved CGP2 region	/	/	1.07905	0.411773	Prophage genes
cg1752	int	putative phage integrase-fragment CGP2 region	0.208934		1.21479	0.227562	Prophage genes
cg1753		putative ATPase component of ABC transporters with duplicated ATPase domains	0.702234	0.0106191	1.18431	0.0844537	General function prediction only
cg1758		putative membrane protein	0.534478	0.0265941	1.27471	0.0452634	Unknown function
cg1759		putative Fe-S cluster assembly protein, part of the sufBDCSU response	2.60113	0.00198787	1.19503	0.109654	Coenzyme transport and metabolism
cg1760	sufU	cysteine desulfhydrase	1.52829	0.0739906	1.17249	0.133376	Coenzyme transport and metabolism
cg1761	sufS	Fe-S cluster assembly protein	1.50591	0.168397	1.21245	0.125239	Coenzyme transport and metabolism
cg1762	sufC	Fe-S cluster assembly ATPase	1.65542	0.0666494	1.10414	0.280356	Coenzyme transport and metabolism
cg1763	sufD	Fe-S cluster assembly membrane protein	2.21882	0.033618	1.20181	0.0767436	Coenzyme transport and metabolism
cg1764	sufB	Fe-S cluster assembly protein	5.30655	0.0599952	1.06722	0.290864	Coenzyme transport and metabolism
cg1765	sufR	transcriptional repressor of the suf operon which is required for the assembly of (Fe-S) clusters, ArsR-family	2.41793	0.00244517	0.993233	0.45596	Signal transduction mechanisms
cg1766	mptB	Mannosyltransferase	1.18627	0.317407	1.18015	0.158793	Cell wall/membrane/envelope biogenesis
cg1767		putative ABC-type multidrug transport system, ATPase component	1.01847	0.342229	0.844911	0.145479	General function prediction only
cg1768		putative ABC-type multidrug transport system, permease component	0.92828	0.458821	1.06895	0.0157495	General function prediction only
cg1769	ctaA	cytochrome oxidase assembly protein	1.08663	0.241702	1.14676	0.221832	Protein turnover and chaperones
cg1770		putative DNA or RNA helicase of superfamily II	/	/	1.36168	0.0538232	General function prediction only
cg1771	qor	probable NADPH:quinone reductase, zeta-crystallin (EC:1.6.5.5)	1.20365	0.107179	1.15292	0.0892084	Respiration and oxidative phosphorylation
cg1773	ctaB	polyprenyltransferase cytochrome oxidase assembly factor	0.205836	0.0573772	0.863312	0.0952421	Protein turnover and chaperones
cg1774	tkt	transketolase (EC:2.2.1.1)	0.870504	0.274599	1.09944	0.221801	Central carbon metabolism
cg1776	tal	transaldolase EC:2.2.1.2	0.590427	0.0394134	1.14886	0.097261	Central carbon metabolism
cg1778	zwf	glucose-6-phosphate dehydrogenase (EC:1.1.1.49)	0.996128	0.427557	1.09748	0.193206	Central carbon metabolism
cg1779	opcA	putative subunit of glucose-6-phosphate dehydrogenase	1.46311	0.0150042	1.16273	0.0613495	Central carbon metabolism
cg1780	pgi (devB)	6-phosphogluconolactonase (EC:3.1.1.31)	1.58639	0.0890124	1.31959	0.0530783	Central carbon metabolism
cg1781	soxA	sarcosine oxidase- C-terminal fragment	/	/	0.816268	3.88578e-16	Carbon source transport and metabolism
cg1782	tnp13b	transposase	0.749644	0.208403	1.19883	0.134962	DNA replication, recombination, repair, and degradation
cg1783	soxA	sarcosine oxidase-N-terminal fragment	/	/	1.04722	0.116013	Carbon source transport and metabolism
cg1784	ocd	ornithine cyclodeaminase (EC:4.3.1.12)	1.24831	0.460849	0.998384	0.457816	Amino acid transport and metabolism
cg1785	amtA (amt)	high-affinity ammonia permease	1.86186	0.177378	0.794252	0.0142963	Inorganic ion transport, metabolism, and storage
cg1786	secG	preprotein translocase subunit	1.2675	0.177038	0.757843	0.0371012	Protein secretion
cg1787	ppc	phosphoenolpyruvate carboxylase (EC:4.1.1.31)	0.416674	0.0196533	1.27537	0.0167932	Central carbon metabolism
cg1789	tpi	triosephosphate isomerase (EC:5.3.1.1)	0.716343	0.24977	1.17247	0.125277	Central carbon metabolism
cg1790	pgk	phosphoglycerate kinase (EC:2.7.2.3)	0.529406	0.0270672	1.00391	0.426289	Central carbon metabolism
cg1791	gapA (gap)	glyceraldehyde-3-phosphate dehydrogenase glycolysis EC:1.2.1.12	0.216395	0.0183597	0.974966	0.468573	Central carbon metabolism
cg1792		putative transcriptional regulator-WhiA homolog	1.86685	0.0788987	1.09792	0.278963	Signal transduction mechanisms
cg1793		hypothetical protein, conserved	1.44526	0.0329922	1.00391	0.42652	Unknown function
cg1794		putative P-loop ATPase protein, conserved	1.11664	0.184391	0.983459	0.490049	General function prediction only
cg1795	uvrC	excinuclease ABC subunit C	1.12005	0.225327	0.989201	0.485853	DNA replication, recombination, repair, and degradation
cg1796	ribX	putative membrane protein-C, ammoniagenes RibX homolog, conserved	1.13425	0.142677	0.998647	0.358685	Coenzyme transport and metabolism
cg1797	ribH	riboflavin synthase subunit β (EC:2.5.1.9)	0.834434	0.0334103	1.12538	0.107184	Coenzyme transport and metabolism
cg1798	ribA	bifunctional 3,4-dihydroxy-2-butanone 4-phosphate synthase/GTP cyclohydrolase II protein (EC:3.5.4.25)	0.690873	0.189553	1.03345	0.0165072	Coenzyme transport and metabolism
cg1799	ribC	riboflavin synthase subunit α (EC:2.5.1.9)	1.07306	0.00921602	1.04432	0.10727	Coenzyme transport and metabolism
cg1800	ribG	putative bifunctional riboflavin-specific deaminase/reductase (EC:3.5.4.26;1.1.1.193)	0.769647	0.213583	1.10226	0.0920486	Coenzyme transport and metabolism
cg1801	rpe	ribulose-phosphate 3-epimerase (EC:5.1.3.1)	1.27681	0.111666	1.08816	0.0224388	Central carbon metabolism
cg1802	fmu	putative 16S rRNA m5C 967 methyltransferase (EC:2.1.1.-)	1.80165	0.0914824	1.13345	0.0113497	Translation, ribosomal structure and biogenesis
cg1803	fmt	methionyl-tRNA formyltransferase (EC:2.1.2.9)	1.27507	0.0285199	1.14571	0.0351461	Translation, ribosomal structure and biogenesis
cg1804	def2	peptide deformylase 2 (EC:3.5.1.31)	2.41337	0.0621996	0.991288	0.475435	Post-translational modification
cg1805	priA	primosome assembly protein PriA or N replication factor Y, helicase superfamily II-type	0.788208	0.33354	0.876373	0.0752997	Transcription including sigma factors, RNA processing and modification
cg1806	metK	S-adenosylmethionine synthetase, methionine adenosyltransferase EC:2.5.1.6	1.22041	0.287977	0.788153	0.0621585	Amino acid transport and metabolism
cg1807	dfp	phosphopantothenoylcysteine synthase/decarboxylase, involved CoA metabolism?	1.10174	0.311563	1.12399	0.0918084	Coenzyme transport and metabolism
cg1809		putative DNA-directed RNA polymerase omega subunit, essential	0.464223	0.111106	0.795823	0.0903538	Transcription including sigma factors, RNA processing and modification
cg1810	gmk	guanylate kinase (EC:2.7.4.8)	0.749783	0.135014	1.01	0.396986	Nucleotide transport and metabolism
cg1811	ihf	putative integration host factor, conserved	0.784693	0.146079	0.963144	0.342687	DNA replication, recombination, repair, and degradation
cg1812	pyrF	orotidine 5-phosphate decarboxylase (EC:4.1.1.23)	0.359969	0.0025976	1.25035	0.0393549	Nucleotide transport and metabolism
cg1813	carB	carbamoyl-phosphate synthase large subunit (EC:6.3.5.5)	0.382048	0.00454511	1.194	0.0170566	Amino acid transport and metabolism; Nucleotide transport and metabolism; Coenzyme transport and metabolism
cg1814	carA	carbamoyl-phosphate synthase small subunit (EC:6.3.5.5)	0.27694	0.0108306	1.07363	0.308406	Amino acid transport and metabolism; Nucleotide transport and metabolism; Coenzyme transport and metabolism
cg1815	pyrC	dihydroorotase (EC:3.5.2.3)	0.359427	0.0553469	1.20993	0.188698	Nucleotide transport and metabolism
cg1816	pyrB	aspartate carbamoyltransferase catalytic subunit (EC:2.1.3.2)	0.280816	0.086163	1.10568	0.139646	Nucleotide transport and metabolism
cg1817	pyrR	mRNA binding regulator, repressor of PyrBC and pyrH, PyrR-family	0.337919	0.0325975	0.939074	0.123471	Signal transduction mechanisms
cg1819		putative nucleoside-diphosphate sugar epimerase SulA-family, conserved	1.16589	0.320868	0.796133	0.0194281	Nucleotide transport and metabolism
cg1821		hypothetical protein, conserved	1.22557	0.169113	0.988757	0.491985	Unknown function
cg1822		hypothetical protein, conserved	1.78439	0.0127235	1.03428	0.301401	Unknown function
cg1823		hypothetical protein	2.36428	0.0236884	1.13616	0.0404375	Unknown function
cg1824	nusB	transcription antitermination protein NusB	0.618533	0.219319	1.03949	0.40777	Transcription including sigma factors, RNA processing and modification
cg1825	efp	elongation factor P	2.57265	0.183716	0.983458	0.42757	Translation, ribosomal structure and biogenesis
cg1826	pepQ	XAA-pro aminopeptidase EC:3.4.11.9	0.719101	0.0531129	1.00088	0.442326	Protein turnover and chaperones
cg1827	aroB	3-dehydroquinate synthase EC:4.6.1.3, essential	0.846106	0.157336	1.15749	0.131002	Amino acid transport and metabolism
cg1828	aroK	shikimate kinase EC:2.7.1.71 essential	0.835527	0.118302	1.14594	0.111827	Amino acid transport and metabolism
cg1829	aroC	chorismate synthase EC:4.6.1.4 essential	0.796496	0.140526	0.912022	0.0817284	Amino acid transport and metabolism
cg1830		putative signal peptidase, membrane protein, cleaves prepilin-like proteins	/	/	1.70599		Protein turnover and chaperones
cg1831		putative transcriptional regulator, ArsR-family	0.86992	0.17939	0.778081	0.0344305	Signal transduction mechanisms
cg1832		putative ABC-type iron-siderophore transporter, substrate-binding lipoprotein	1.63253	0.262881	0.872201	0.0380961	Inorganic ion transport, metabolism, and storage; Transport and metabolism of further metabolites
cg1833		putative ABC-type iron-siderophore transporter, ATPase subunit	0.645343	0.199969	1.05654	0.356478	Inorganic ion transport, metabolism, and storage; Transport and metabolism of further metabolites
cg1834		putative ABC-type iron-siderophore transporter, permease subunit	1.45902	0.237084	0.911161	0.331216	Inorganic ion transport, metabolism, and storage; Transport and metabolism of further metabolites
cg1835	aroE3	shikimate 5-dehydrogenase EC:1.1.1.25	0.747511	0.0223416	1.06312	0.250735	Amino acid transport and metabolism
cg1836		putative secreted solute-binding protein, aminodeoxychorismate lyase-like, conserved	1.46935	0.177631	0.889235	0.0861803	General function prediction only
cg1837		putative holliday junction resolvase-like protein	1.04943	0.171155	0.771388	0.0311116	DNA replication, recombination, repair, and degradation
cg1838	alaS	alanyl-tRNA synthetase (EC:6.1.1.7)	2.60474	0.164725	1.10409	0.0335479	Translation, ribosomal structure and biogenesis
cg1839		putative ATPase related to the helicase subunit of the holliday junction resolvase, conserved	0.879106	0.273228	0.965509	0.390568	DNA replication, recombination, repair, and degradation
cg1840		hypothetical protein, conserved	0.899768	0.265189	1.10946	0.0614593	Unknown function
cg1841	aspS	aspartyl-tRNA synthetase (EC:6.1.1.12)	1.32375	0.0491307	0.849631	0.0744869	Translation, ribosomal structure and biogenesis
cg1842		putative secreted metalloprotease	1.13195	0.298311	1.25491	0.0729823	Protein turnover and chaperones
cg1843		putative superfamily II DNA/RNA helicase, SNF2-family	0.618871	0.104363	1.19654	0.000391154	General function prediction only
cg1844		putative membrane protein	0.88829	0.0694365	1.11678	0.0727994	Unknown function
cg1845		hypothetical protein, conserved	0.945102	0.433862	1.02739	0.357041	Unknown function
cg1846		putative transcriptional regulator, TetR-family, regulates cg1844-cg1847, structure is known: pdb 2O7T	1.03171	0.356001	0.84273	0.105104	Signal transduction mechanisms
cg1847		hypothetical protein, conserved	0.911534	0.35478	0.854585	0.218556	Unknown function
cg1848		putative coenzyme F420-dependent N5,N10-methylene tetrahydromethanopterin reductase	1.25761	1.41044e-05	0.914938	0.178116	Coenzyme transport and metabolism
cg1849		hypothetical protein, conserved	2.73158	0.0175066	1.07455	0.0501541	Unknown function
cg1850		putative flavoprotein (EC:1.5.1.29)	1.4157	0.0509677	1.16576	0.0634913	General function prediction only
cg1852	sdaA	serine deaminase, L-Serine dehydratase (EC:4.3.1.17)	1.7073	0.0462991	1.11684	0.0785865	Amino acid transport and metabolism
cg1853	glpD	glycerol-3-phosphate dehydrogenase (EC:1.1.99.5)	1.15458	0.165821	0.566747	0.0155296	Central carbon metabolism; Respiration and oxidative phosphorylation
cg1855	hisS	histidyl-tRNA synthetase (EC:6.1.1.21)	0.909534	0.34528	1.1026	0.136395	Translation, ribosomal structure and biogenesis
cg1856		putative Zn-dependent hydrolase	0.933116	0.294566	0.895805	0.223982	General function prediction only
cg1857	ppiB	peptidyl-prolyl cis-trans isomerase, membrane-bound (EC:5.2.1.8)	0.297499	0.0127112	0.997984	0.410385	Protein turnover and chaperones
cg1859		putative secreted protein	0.693596	0.0507917	1.02454	0.271259	Unknown function
cg1860		putative membrane protein	1.22959	0.0661979	1.12756	0.0200914	Unknown function
cg1861	rel	ppGpp synthetase, ppGpp pyrophosphorylase (EC:2.7.6.5)	0.843312	0.0499926	1.22736	0.00813554	Signal transduction mechanisms
cg1862	apt	adenine phosphoribosyltransferase (EC:2.4.2.7)	1.32729	0.0802632	0.930987	0.188313	Nucleotide transport and metabolism
cg1864		putative ABC-type dipeptide/oligopeptide/nickel transport systems, secreted component	1.49011	0.0282185	0.965288	0.25555	General function prediction only
cg1865	secF	preprotein translocase subunit	0.343628	0.00764912	1.23965	0.00596698	Protein secretion
cg1867	secD	preprotein translocase subunit	0.353518	0.00337218	1.15266	0.104343	Protein secretion
cg1868	secN	preprotein translocase subunit YajC homolog	2.98091	0.201995	0.850031	0.0496288	Protein secretion
cg1869	ruvB	holliday junction DNA helicase RuvB	2.59559	0.00262873	1.04974	0.186312	DNA replication, recombination, repair, and degradation
cg1870	ruvA	holliday junction DNA helicase motor protein	1.81985	0.0195387	1.01135	0.368174	DNA replication, recombination, repair, and degradation
cg1871	ruvC	holliday junction resolvase	4.61735	0.0416381	0.98404	0.491816	DNA replication, recombination, repair, and degradation
cg1872		hypothetical protein, conserved	1.78467	0.361498	0.993255	0.447408	Unknown function
cg1873	tesB2	putative acyl-CoA thioesterase II protein (EC:3.1.2.2)	1.65117	0.00551723	0.856473	0.0923361	Carbon source transport and metabolism
cg1874		putative membrane protein	4.02307	0.0353691	0.990107	0.480942	Unknown function
cg1875		putative membrane protein	0.954322	0.45793	1.00114	0.450393	Unknown function
cg1876		putative glycosyl transferase (EC:2.4.1.-)	0.579825	0.0746972	0.990094	0.464393	General function prediction only
cg1877		putative lipid A biosynthesis lauroyl acyltransferase	0.704207	0.0104277	1.22633	0.128907	Cell wall/membrane/envelope biogenesis
cg1878	pgsA1	phosphatidylglycerophosphate synthase	0.759006	0.175071	1.19515	0.196567	Cell wall/membrane/envelope biogenesis
cg1879		putative HIT-family hydrolase	0.902968	0.375256	1.14772	0.256533	General function prediction only
cg1880	thrS	threonyl-tRNA synthetase (EC:6.1.1.3)	0.631738	0.0289577	1.16671	0.116661	Translation, ribosomal structure and biogenesis
cg1881		putative iron-dependent peroxidase, secreted protein, conserved	0.0987389	0.00146915	1.0365	0.353414	Inorganic ion transport, metabolism, and storage
cg1883		putative secreted protein	0.102458	0.00438873	1.13264	0.192152	Unknown function
cg1884		putative copper resistance protein C	0.105463	0.00343994	1.06401	0.227945	Inorganic ion transport,metabolism, and storage
cg1890	alpC	actin-like protein CGP3 region	1.26657		1.13063	0.254583	Prophage genes
cg1891	alpA	putative phage DNA adapter protein CGP3 region	/	/	0.925257	0.357679	Prophage genes
cg1892		hypothetical protein, conserved CGP3 region	0.911658	0.218956	0.86333	0.0433872	Prophage genes
cg1893	act4	putative N-acetyltransferase CGP3 region	0.745428	0.00231034	0.835416	0.0883657	Prophage genes
cg1894		hypothetical protein CGP3 region	0.801457	0.196431	1.10306	0.249451	Prophage genes
cg1895		putative secreted protein CGP3 region	0.914226	0.116663	1.15965	0.0570895	Prophage genes
cg1896		putative secreted protein CGP3 region	1.13566	0.236534	1.11892	0.208591	Prophage genes
cg1897		putative secreted protein CGP3 region	0.367529	0.0861723	1.11229	0.0903029	Prophage genes
cg1898		hypothetical protein CGP3 region	0.795719	0.13586	1.08577	0.314986	Prophage genes
cg1899		hypothetical protein CGP3 region	0.443075	0.0940986	0.882949	0.148682	Prophage genes
cg1900		hypothetical protein CGP3 region	/	/	0.844118	0.27749	Prophage genes
cg1901		hypothetical protein CGP3 region	1.32555	0.217437	1.17463	0.0166349	Prophage genes
cg1902		putative secreted protein CGP3 region	2.32457	0.0217802	1.09439	0.0674195	Prophage genes
cg1903		putative ABC-type multidrug transport system, ATPase component CGP3 region	1.11001	0.0380828	1.09893	0.138609	Prophage genes
cg1904		putative membrane protein CGP3 region	1.06036	0.218418	1.14006	0.21405	Prophage genes
cg1905		hypothetical protein CGP3 region	0.158333	0.00884857	1.24294	0.0508498	Prophage genes
cg1906		hypothetical protein CGP3 region	0.144103	0.00128006	1.08565	0.118235	Prophage genes
cg1907		putative phosphopantothenoylcysteine synthetase/decarboxylase CGP3 region	0.143933	0.00142464	1.13179	0.0524955	Prophage genes
cg1908		hypothetical protein CGP3 region	0.207043	0.000394939	1.07533	0.0964344	Prophage genes
cg1909		hypothetical protein CGP3 region	0.316406	0.0682133	0.966995	0.449234	Prophage genes
cg1910		putative secreted or membrane protein CGP3 region	0.0716513	0.0216087	1.23409	0.0475588	Prophage genes
cg1911		putative secreted protein CGP3 region	0.0811152	0.00241937	1.21684	0.0209944	Prophage genes
cg1912		hypothetical protein CGP3 region	0.723977	3.44169e-15	1.18861	0.127275	Prophage genes
cg1913		hypothetical protein CGP3 region	0.685262	2.16493e-15	0.970682	0.450119	Prophage genes
cg1914		hypothetical protein CGP3 region	0.130322	0.00164842	0.8747	0.262939	Prophage genes
cg1915		hypothetical protein CGP3 region	0.962638	0.0617378	0.973651	0.473764	Prophage genes
cg1916		hypothetical protein CGP3 region	1.20251	0.341434	0.848102	0.142668	Prophage genes
cg1917		hypothetical protein CGP3 region	1.41205	0.0116596	1.41742	0.0224874	Prophage genes
cg1918		putative secreted protein CGP3 region	1.41862	0.0182746	1.1893	0.10712	Prophage genes
cg1919		putative membrane protein CGP3 region	0.476829	0.0772579	1.04536	0.358004	Prophage genes
cg1920		hypothetical protein CGP3 region	0.787236	0.0455665	0.905113	0.193172	Prophage genes
cg1921		hypothetical protein CGP3 region	0.53323	0.0229857	0.923093	0.257044	Prophage genes
cg1922		hypothetical protein CGP3 region	0.514508	0.232471	1.0039	0.468418	Prophage genes
cg1923		hypothetical protein CGP3 region	0.321552	0.103909	0.921736	0.307464	Prophage genes
cg1924		hypothetical protein CGP3 region	0.629742	0.149763	0.932166	0.342197	Prophage genes
cg1925		hypothetical protein CGP3 region	0.802801	0.019647	0.989028	0.488671	Prophage genes
cg1926		hypothetical protein CGP3 region	0.861621	0.167002	1.03669	0.348616	Prophage genes
cg1927		putative molecular chaperone CGP3 region	0.598259	0.0419844	1.07941	0.309611	Prophage genes
cg1928		hypothetical protein CGP3 region	0.570965	0.0616907	1.00352	0.428411	Prophage genes
cg1929	res	resolvase,-family recombinase CGP3 region	0.177759	0.0255822	0.646733	0.0730782	Prophage genes
cg1930		putative secreted hydrolase CGP3 region	1.14366	0.257011	1.08055	0.340641	Prophage genes
cg1931		putative secreted protein CGP3 region	0.720814	0.0901858	1.1549	0.0539406	Prophage genes
cg1934		hypothetical protein CGP3 region	/	/	0.928786	0.381404	Prophage genes
cg1935	gntR2	gluconate-responsive repressor 2, repressor of genes involved in gluconate catabolism and the pentose phosphate pathway CGP3 region, GntR-family	0.594172	0.0072327	1.06513	0.252167	Prophage genes
cg1936		putative secreted protein CGP3 region	0.938254	0.211901	1.05188	0.29609	Prophage genes
cg1937		putative secreted protein CGP3 region	1.79591	0.100924	0.931352	0.136015	Prophage genes
cg1938		hypothetical protein CGP3 region	/	/	1.28613	0.0101482	Prophage genes
cg1940		putative secreted protein CGP3 region	0.553307	0.0515851	0.724647	0.0239967	Prophage genes
cg1941		putative secreted protein CGP3 region	0.82584	0.28987	0.8831	0.049436	Prophage genes
cg1942		putative secreted protein CGP3 region	0.334224	0.0219328	1.29037	0.00914607	Prophage genes
cg1943		hypothetical protein CGP3 region	0.122467	0.105421	1.11155	0.219428	Prophage genes
cg1944		hypothetical protein CGP3 region	1.90251	0.0339674	1.19726	0.00722186	Prophage genes
cg1945		hypothetical protein, conserved CGP3 region	2.20018	0.0702013	0.874644	0.0853364	Prophage genes
cg1946		hypothetical protein CGP3 region	1.45521	0.0966473	0.941587	0.107	Prophage genes
cg1947		hypothetical protein CGP3 region	0.803325	0.126694	0.919552	0.162295	Prophage genes
cg1948		hypothetical protein CGP3 region	5.84885		0.574651	0.289948	Prophage genes
cg1949		hypothetical protein CGP3 region	0.634618	0.0274341	0.987399	0.496704	Prophage genes
cg1950	tnp14b	transposase fragment CGP3 region	2.73184	0.125776	0.994772	0.45491	Prophage genes
cg1951	tnp14a	transposase fragment CGP3 region	1.57998	0.356084	1.45284	0.0150416	Prophage genes
cg1954		hypothetical protein CGP3 region	/	/	0.545241		Prophage genes
cg1955		putative secreted protein CGP3 region	0.286475	0.00293592	0.862429	0.247633	Prophage genes
cg1956	recJ	single-stranded-DNA-specific exonuclease CGP3 region	0.287561	0.0483242	1.14268	0.132065	Prophage genes
cg1957		hypothetical protein CGP3 region	/	/	1.13655		Prophage genes
cg1959	priP	prophage DNA primase CGP3 region	0.274111	0.128823	0.905504	0.100184	Prophage genes
cg1960		hypothetical protein CGP3 region	0.48541	0.0218215	1.08881	0.167692	Prophage genes
cg1961		hypothetical protein CGP3 region	0.437625	0.0660902	0.990939	0.46164	Prophage genes
cg1962		putative membrane protein CGP3 region	0.0390318	0.00177401	0.825054	0.0362801	Prophage genes
cg1963		putative superfamily II DNA/RNA helicase CGP3 region	2.8288	0.0548765	1.01486	0.352986	Prophage genes
cg1964		hypothetical protein CGP3 region	1.29239	0.00888029	0.831888	0.0132465	Prophage genes
cg1965		putative protein, similarity to gp57-phage N15 CGP3 region	1.07641	0.322126	0.961517	0.391753	Prophage genes
cg1966	cgpS	Prophage silencing protein	1.13004	0.160111	1.08382	0.00804454	Prophage genes
cg1967		hypothetical protein CGP3 region	0.287199	0.0264554	0.986249	0.498835	Prophage genes
cg1968		hypothetical protein CGP3 region	0.273007	0.00477849	0.866288	0.0799972	Prophage genes
cg1969		hypothetical protein CGP3 region	0.515241	0.0171848	0.925428	0.352548	Prophage genes
cg1970		hypothetical protein CGP3 region	0.559966	0.0928013	0.996442	0.454701	Prophage genes
cg1971		hypothetical protein CGP3 region	/	/	1.07637	0.308591	Prophage genes
cg1972		putative translation elongation factor, GTPase CGP3 region	/	/	1.19223	0.256116	Prophage genes
cg1974		putative protein, contains peptidoglycan-binding LysM domain CGP3 region	1.03976	0.474779	1.05624	0.280031	Prophage genes
cg1975		hypothetical protein, conserved CGP3 region	0.325101	0.00454478	0.884314	0.0833741	Prophage genes
cg1976		hypothetical protein CGP3 region	0.172055	0.131558	0.761036	0.133148	Prophage genes
cg1977		putative secreted protein CGP3 region	3.52128	0.0106442	0.852752	0.244503	Prophage genes
cg1978		hypothetical protein CGP3 region	1.34051	0.0464943	1.04548	0.261008	Prophage genes
cg1980		puative MoxR-like ATPase CGP3 region	2.08296	0.0512511	0.971272	0.436146	Prophage genes
cg1981		hypothetical protein CGP3 region	0.98804	0.47702	0.955285	0.39606	Prophage genes
cg1982		putative ATPase with chaperone activity, ATP-binding subunit CGP3 region	1.5443	0.0553575	0.892932	0.29094	Prophage genes
cg1983		hypothetical protein CGP3 region	2.14709	0.0488992	1.07369	0.222925	Prophage genes
cg1984		hypothetical protein CGP3 region	1.45688	0.143602	0.785494	0.00479916	Prophage genes
cg1985		putative superfamily I DNA or RNA helicase CGP3 region	1.31679	0.190109	0.906127	0.148941	Prophage genes
cg1986		hypothetical protein CGP3 region	0.974848	0.488162	0.917036	0.0412855	Prophage genes
cg1987		hypothetical protein CGP3 region	1.24981	0.194177	0.914627	0.277679	Prophage genes
cg1988		hypothetical protein CGP3 region	0.996032	0.448095	0.681952	0.0772852	Prophage genes
cg1989		hypothetical protein CGP3 region	2.49126	0.0632715	0.965182	0.441527	Prophage genes
cg1990		putative NUDIIX hydrolase CGP3 region	1.00325	0.102413	0.941433	0.19613	Prophage genes
cg1991		putative protein, similar to gp52-bacterophage PHIC31	0.867316	0.0649426	1.00113	0.412816	Prophage genes
cg1992		hypothetical protein CGP3 region	2.9683	0.0297327	0.935774	0.303293	Prophage genes
cg1993		hypothetical protein CGP3 region	1.84599	0.0169157	1.00617	0.407079	Prophage genes
cg1994		hypothetical protein CGP3 region	1.15191	0.308418	1.05039	0.196566	Prophage genes
cg1995		hypothetical protein CGP3 region	0.451191	4.996e-16	1.01629	0.43787	Prophage genes
cg1996	cglIM	modification methylase, DNA cytosine-5--methyltransferase EC:2.1.1.37 CGP3 region	2.91936	0.000895052	0.901919	0.269192	Prophage genes
cg1997	cglIR	type II restriction endonuclease CGP3 region	1.12836	0.153776	0.817643	0.138503	Prophage genes
cg1998	cglIIR	restriction endonuclease CGP3 region	1.50526	0.0327278	0.920223	0.175058	Prophage genes
cg1999		hypothetical protein CGP3 region	0.781171	0.204823	0.988092	0.486204	Prophage genes
cg2000		putative membrane protein CGP3 region	1.70971	0.0539274	0.998607	0.439034	Prophage genes
cg2001		hypothetical protein, conserved CGP3 region	0.538551	0.0249005	1.15088	0.172359	Prophage genes
cg2002		hypothetical protein CGP3 region	0.409621	0.0159065	0.814511	0.00508766	Prophage genes
cg2003		hypothetical protein, conserved CGP3 region	/	/	0.924644	0.264167	Prophage genes
cg2004		puative protein, similar to 232 protein-lactobacillus bacteriophage g1e, conserved CGP3 region	1.82652	0.0947041	1.20295	0.00783924	Prophage genes
cg2005		putative protein-plasmid encoded, conserved CGP3 region	3.79558	0.0822314	1.15294	0.239717	Prophage genes
cg2006		hypothetical protein CGP3 region	1.62294	0.0189227	0.965614	0.402365	Prophage genes
cg2007		putative membrane protein CGP3 region	3.60571	0.0771298	0.943393	0.426096	Prophage genes
cg2008		putative membrane protein CGP3 region	0.600448	0.0458694	1.05293	0.298301	Prophage genes
cg2009		putative CLP-family ATP-binding protease CGP3 region	2.04824	0.174089	1.05712	0.028011	Prophage genes
cg2010		putative permease of the major facilitator superfamily CGP3 region	0.992062	7.31101e-05	1.10039	0.156792	Prophage genes
cg2011		putative membrane protein CGP3 region	0.947912	9.64114e-06	1.22352	0.0874214	Prophage genes
cg2014		hypothetical protein CGP3 region	0.958741	0.411108	1.11234	0.179276	Prophage genes
cg2015		hypothetical protein CGP3 region	/	/	1.17605	0.148195	Prophage genes
cg2016		hypothetical protein CGP3 region	/	/	1.16427	0.142157	Prophage genes
cg2017		hypothetical protein CGP3 region	1.55335		1.1992	0.110056	Prophage genes
cg2018		putative membrane protein CGP3 region	1.05929	0.410125	1.06567	0.0640838	Prophage genes
cg2019		putative membrane protein CGP3 region	0.921242	0.332915	1.08903	0.0379168	Prophage genes
cg2020		putative membrane protein CGP3 region	/	/	1.1542	0.25003	Prophage genes
cg2021		putative protein, similar to p18, bacteriophage CP-1 streptococcus pneumoniae CGP3 region	/	/	1.09833	0.0723631	Prophage genes
cg2022		putative secreted protein CGP3 region	0.166804	0.106995	0.96918	0.442398	Prophage genes
cg2023		putative membrane protein CGP3 region	/	/	1.33953	0.0566778	Prophage genes
cg2024		putative nuclease subunit of the excinuclease complex CGP3 region	0.687771	2.77556e-15	1.04892	0.360658	Prophage genes
cg2025		hypothetical protein CGP3 region	1.01512	0.301508	1.24089	0.0442096	Prophage genes
cg2026		hypothetical protein CGP3 region	1.31645	0.124496	1.36736	0.0403162	Prophage genes
cg2027		hypothetical protein CGP3 region	1.27399	0.063653	1.10519	0.133354	Prophage genes
cg2028		hypothetical protein CGP3 region	0.890989	0.405613	0.987086	0.49825	Prophage genes
cg2029		hypothetical protein CGP3 region	1.55468	0.0496526	0.894844	0.196604	Prophage genes
cg2030		hypothetical protein CGP3 region	1.70334	0.0116445	0.901218	0.205077	Prophage genes
cg2031		hypothetical protein, conserved CGP3 region	1.42111	0.0714282	1.21358	0.0626266	Prophage genes
cg2032		putative membrane protein CGP3 region	0.937501	0.468977	1.2179	0.115175	Prophage genes
cg2033		putative secreted protein CGP3 region	0.25571	0.0101584	0.999266	0.457357	Prophage genes
cg2034		hypothetical protein CGP3 region	1.38457	0.0616863	0.93875	0.0848178	Prophage genes
cg2035		putative methyltransferase CGP3 region	1.51261	0.0603639	0.801853	0.124985	Prophage genes
cg2036		putative secreted protein CGP3 region	1.99904	0.140906	0.789728	0.0568811	Prophage genes
cg2037		hypothetical protein, conserved CGP3 region	2.56497	0.134382	1.13687	0.00217812	Prophage genes
cg2038		hypothetical protein CGP3 region	1.70131	0.0330565	0.99263	0.478048	Prophage genes
cg2039		hypothetical protein CGP3 region	1.13256	0.0104313	0.945464	0.0997052	Prophage genes
cg2040		putative transcriptional regulator, HTH_3-family CGP3 region	0.924313	0.398653	0.912384	0.100069	Prophage genes
cg2041		hypothetical protein CGP3 region	1.82926	0.00221805	0.913524	0.179825	Prophage genes
cg2042		putative secreted protein CGP3 region	2.2507	0.159147	1.13822	0.0335057	Prophage genes
cg2043		hypothetical protein, conserved CGP3 region	0.339393	0.0103422	0.88403	0.116564	Prophage genes
cg2044		putative secreted protein CGP3 region	0.692647	0.154255	1.13206	0.00882619	Prophage genes
cg2045		hypothetical protein CGP3 region	0.704873	0.00973577	1.1927	0.00143188	Prophage genes
cg2046		hypothetical protein CGP3 region	1.58957	0.0172007	1.06086	0.189058	Prophage genes
cg2047		putative secreted protein CGP3 region	5.40236	0.00212913	0.725548	0.00453388	Prophage genes
cg2050		hypothetical protein CGP3 region	7.2265	0.108889	1.05024		Prophage genes
cg2051		hypothetical protein CGP3 region	1.03676	0.370359	1.10927	0.0548555	Prophage genes
cg2052		putative secreted protein CGP3 region	1.4965	0.119954	1.48921	0.00991268	Prophage genes
cg2053		putative membrane protein CGP3 region	2.17607	0.164719	0.694639	0.0479589	Prophage genes
cg2054		putative membrane protein CGP3 region	1.55202	0.161108	0.69586	0.119869	Prophage genes
cg2055		putative membrane protein CGP3 region	2.51345	0.116061	0.9438	0.341612	Prophage genes
cg2056		putative membrane protein CGP3 region	0.986264	0.473222	1.01414	0.427415	Prophage genes
cg2057		putative secreted protein CGP3 region	0.704214	0.212267	1.07804	0.013889	Prophage genes
cg2058		hypothetical protein CGP3 region	1.09416	0.232931	1.10264	0.0191378	Prophage genes
cg2059		putative secreted protein CGP3 region	0.667993	0.0436698	1.03426	0.263614	Prophage genes
cg2060		hypothetical protein CGP3 region	0.608149	0.102915	0.964656	0.370625	Prophage genes
cg2061	psp3	putative secreted protein CGP3 region	0.0510731	0.0517371	1.24732	0.0148389	Prophage genes
cg2062		putative protein, similar to plasmid-encoded protein PXO2.09 CGP3 region	1.07414	1.34472e-71	0.980778	0.460353	Prophage genes
cg2063		putative membrane protein CGP3 region	0.74978	3.94129e-15	1.19666	0.0252548	Prophage genes
cg2064		putative DNA topoisomerase I omega-protein EC:5.99.1.2 CGP3 region	0.432115	0.0560443	1.01537	0.199608	Prophage genes
cg2065		putative superfamily II DNA or RNA helicase CGP3 region	/	/	1.3764	0.0740223	Prophage genes
cg2066		putative low-complexity protein	/	/	1.01645	0.461859	Prophage genes
cg2067		hypothetical protein CGP3 region	1.18263	0.181412	0.88346	0.05549	Prophage genes
cg2068		hypothetical protein CGP3 region	0.528446	0.162695	0.868456	0.0545902	Prophage genes
cg2069	psp1	putative secreted protein CGP3 region	1.98923	0.0175041	0.868445	0.0784481	Prophage genes
cg2070	int2	putative phage integrase C-terminal fragment, CGP3 region	0.681059	0.0246762	1.09741	0.117873	Prophage genes
cg2071	int2	putative phage integrase N-terminal fragment, CGP3 region	0.720021	0.144615	1.03249	0.124401	Prophage genes
cg2074		hypothetical protein	/	/	1.06467	0.333993	Unknown function
cg2075		hypothetical protein	/	/	1.20792	0.065423	Unknown function
cg2076	ribD	putative protein, maybe involved in atrazine degradation, putative riboflavin specific deaminase (EC:3.5.4.26)	1.4363	0.254479	1.17258	0.101607	Transport and metabolism of further metabolites
cg2077	aftC	arabinofuranosyltransferase	1.01106	0.412265	1.00353	0.401096	Cell wall/membrane/envelope biogenesis
cg2078	msrB	peptide methionine sulfoxide reductase-related protein	2.28076	0.0661019	1.27613	0.0131305	Amino acid transport and metabolism
cg2079		putative chlorite dismutase-family protein, conserved	0.658942	0.237432	1.02745	0.39964	Inorganic ion transport and metabolism
cg2080		hypothetical protein, conserved	0.573627	0.0515394	1.01723	0.284853	Unknown function
cg2081	rnd	putative ribonuclease D protein (EC:3.1.26.3)	0.947083	0.338904	1.00233	0.390175	Transcription including sigma factors, RNA processing and modification
cg2083	dxs	1-deoxy-D-xylulose-5-phosphate synthase (EC:2.2.1.7)	0.827805	0.213249	1.01916	0.189933	Coenzyme transport and metabolism
cg2084		putative RNA methyltransferase EC:2.1.1.-	0.517021	0.122378	1.09199	0.126268	Transcription including sigma factors, RNA processing and modification
cg2085		hypothetical protein, conserved	1.0114	0.385627	0.986541	0.499517	Unknown function
cg2086	dut	deoxyuridine 5-triphosphate nucleotidohydrolase (EC:3.6.1.23)	0.69569	0.00626529	1.21737	0.0451527	Nucleotide transport and metabolism
cg2087		putative membrane protein	1.31864	0.00980923	0.903545	0.0188755	Unknown function
cg2088		hypothetical protein	1.3937	0.0735525	0.965368	0.377635	Unknown function
cg2089		hypothetical protein, conserved	0.848711	0.291255	1.12165	0.134853	Unknown function
cg2090	suhB	myo-inositol-1or 4-monophosphatase (EC:3.1.3.25)	0.826938	0.312713	1.2906	0.00867797	Cell wall/membrane/envelope biogenesis
cg2091	ppgK	polyphosphate glucokinase (EC:2.7.1.63)	1.21379	0.0900957	0.992556	0.468257	Carbon source transport and metabolism; Inorganic ion transport and metabolism
cg2092	sigA (rpoD)	RNA polymerase σ factor	1.00442	0.422661	0.936376	0.282333	Transcription including sigma factors, RNA processing and modification
cg2094		hypothetical protein	/	/	1.40518	0.0604152	Unknown function
cg2095		putative membrane protein	0.557988	0.0854622	1.17267	0.0287113	Unknown function
cg2096		putative membrane protein	0.415308	0.00851259	1.13772	0.133058	Unknown function
cg2097		putative DNA or RNA helicase of superfamily II	1.00108	0.246675	1.1465	0.0309181	General function prediction only
cg2098		hypothetical protein	1.09157	0.212602	1.12543	0.194583	Unknown function
cg2099		putative membrane protein	1.24481	0.0236347	0.820806	0.0866415	Unknown function
cg2100		putative rRNA or tRNA methylase	1.35925	0.141979	1.11704	0.0735299	Translation, ribosomal structure and biogenesis
cg2101		putative D-tyrosyl-tRNA deacylase	1.27132	0.142205	1.04818	0.186966	Translation, ribosomal structure and biogenesis
cg2102	sigB	RNA polymerase σ factor	4.04155	0.00483225	1.26154	0.0354228	Transcription including sigma factors, RNA processing and modification
cg2103	dtxR	master regulator of iron-dependent gene expression, diphtheria toxin repressor DtxR-family	1.43067	0.01649	0.881672	0.265226	Signal transduction mechanisms
cg2104	galE	UDP-glucose 4-epimerase EC:5.1.3.2	0.821688	0.324857	0.857114	0.0137348	Carbon source transport and metabolism
cg2105		hypothetical protein	0.24775	0.0119136	1.06578	0.0952983	Unknown function
cg2106		hypothetical protein, conserved	2.17065	0.033561	0.903725	0.172871	Unknown function
cg2107		putative superfamily II DNA or RNA helicase	1.1724	0.15064	1.19107	0.0296984	General function prediction only
cg2109	oxyR	hydrogen peroxide sensing regulator, Lys-family	0.512146	0.0205054	0.917549	0.221864	Signal transduction mechanisms
cg2110		putative membrane protein	1.40048	0.0505873	1.27564	0.0298358	Unknown function
cg2111	hrpA	probable ATP-dependent RNA helicase protein	1.06883	0.383613	1.11648	0.0923546	Transcription including sigma factors, RNA processing and modification
cg2112	nrdR	transcriptional regulator of deoxyribonucleotide biosynthesis, YbaD-family (predicted, not yet experimentally proven)	7.31157	0.000819512	1.13032	0.121083	Signal transduction mechanisms
cg2113	divS	transcriptional regulator, suppressor of cell division	7.6912	0.000497818	1.00111	0.377595	Signal transduction mechanisms
cg2114	lexA	transcriptional repressor/regulator, involved in SOS/stress response, LexA-family	0.525855	0.006516	1.03915	0.358087	Signal transduction mechanisms
cg2115	sugR	transcriptional regulator of ptsG, ptsS and cg2118-fruK-ptsF operon and ramA, DeoR-type	1.02355	0.379083	0.903394	0.29392	Signal transduction mechanisms
cg2116		putative phosphofructokinase	0.984021	0.467846	1.0869	0.16106	Central carbon metabolism
cg2117	ptsI	EI enzyme, general component of PTS (EC:2.7.3.9)	0.26641	0.00305536	1.09217	0.250266	Carbon source transport and metabolism
cg2118	fruR	transcriptional regulator of sugar metabolism, presumably fructose responsive, DeoR-family	0.396586	0.00310038	0.703096	0.0471553	Signal transduction mechanisms
cg2119	pfkB (fruK)	1-phosphofructokinase (EC:2.7.1.56)	0.850392	0.326523	1.11042	0.0251817	Central carbon metabolism
cg2120	ptsF	fructose-specific enzyme II BC component of PTS (EC:2.7.1.69)	0.463083	0.0111949	1.12656	0.0114667	Carbon source transport and metabolism
cg2121	ptsH	phosphocarrier protein HPr, general component of PTS	1.86856	0.025518	1.11842	0.263103	Carbon source transport and metabolism
cg2124		putative transcriptional regulator, AraC-family	1.36505	0.0206119	0.832501	0.0828215	Signal transduction mechanisms
cg2125	uraA	putative uracyl permease	0.674663	0.144104	1.04976	0.294982	Nucleotide transport and metabolism
cg2126	hflX	GTPase	2.32221	0.0681147	1.0039	0.306726	Translation, ribosomal structure and biogenesis
cg2127		hypothetical protein	0.693843	0.0875445	0.975247	0.441129	Unknown function
cg2128		putative secreted or membrane protein	0.764827	0.238985	0.832027	0.276864	Unknown function
cg2129	dapF	diaminopimelate epimerase (EC:5.1.1.7)	1.78963	0.0886477	1.02907	0.16559	Amino acid transport and metabolism
cg2130	miaA	tRNA δ2-isopentenylpyrophosphate transferase (EC:2.5.1.8)	0.926056	0.222309	1.1084	0.0764993	Translation, ribosomal structure and biogenesis
cg2131		hypothetical protein	1.27228	0.00224343	0.992304	0.486706	Unknown function
cg2132		hypothetical protein, conserved	0.927467	0.442861	0.917726	0.239608	Unknown function
cg2133		putative acetyltransferase, GNAT-family	0.943308	0.311205	1.04446	0.358437	General function prediction only
cg2134		putative membrane protein	0.934199	0.283317	1.18568	0.0941861	Unknown function
cg2135	miaB	tRNA methylthiotransferase	0.802864	0.13582	0.896385	0.106591	Translation, ribosomal structure and biogenesis
cg2136	gluA	glutamate uptake system, ABC-type, ATP-binding protein	0.0604301	0.000574242	1.01806	0.319585	Amino acid transport and metabolism
cg2137	gluB	glutamate uptake system, secreted glutamate-binding protein	0.0446423	0.0008016	1.05676	0.0358283	Amino acid transport and metabolism
cg2138	gluC	glutamate uptake system, ABC-type, permease subunit 1	0.061509	0.000607745	1.05392	0.109689	Amino acid transport and metabolism
cg2139	gluD	glutamate uptake system, ABC-type, permease subunit 2	0.251646	0.00715867	1.07684	0.322109	Amino acid transport and metabolism
cg2140	recX	transcriptional regulator involved in DNA repair, RecX-family	5.59495	0.00998147	1.05637	0.125177	DNA replication, recombination, repair, and degradation
cg2141	recA	recombinase A (EC:3.4.21.88)	3.56634	0.00347441	1.14702	0.000113616	DNA replication, recombination, repair, and degradation
cg2145		hypothetical protein, conserved	1.11563	0.314617	0.819296	0.0392511	Unknown function
cg2146		hypothetical protein	3.39907	0.0396261	1.187	0.136257	Unknown function
cg2147	bioY	substrate-specific component BioY of biotin ECF transporter	0.247884	0.040283	0.753717	0.125836	Coenzyme transport and metabolism
cg2148	bioM	ATPase component BioM of energizing module of biotin ECF transporter	0.765926	0.213892	0.922833	0.185711	Coenzyme transport and metabolism
cg2149	bioN	transmembrane component BioN of energizing module of biotin ECF transporter	1.2694	0.399472	0.983346	0.472251	Coenzyme transport and metabolism
cg2151		putative protein similar to phage shock protein A	1.19865	0.18122	0.805156	0.000371091	General function prediction only
cg2152	clgR	transcriptional regulator, HTH_3-family, regulates genes involved in proteolysis and DNA repair	1.91513	0.0635413	0.950251	0.250163	Signal transduction mechanisms
cg2153		putative protein similar to competence-and mitomycin-induced protein, CinA-like protein	2.71457	0.0331939	0.943916	0.0228447	General function prediction only
cg2154	pgsA2	CDP-diacylglycerol--glycerol-3-phosphate 3-phosphatidyltransferase EC:2.7.8.5	1.87203	0.0705797	0.991936	0.480108	Cell wall/membrane/envelope biogenesis
cg2155		hypothetical protein, conserved	0.41547	0.0506812	0.868136	0.249028	Unknown function
cg2156		hypothetical protein	/	/	1.08412	0.0902983	Unknown function
cg2157	terC	tellurium resistance membrane protein	1.13393	0.0218271	1.0045	0.446142	Inorganic ion transport and metabolism
cg2158	ftsK	cell division protein, required for cell division and chromosomepartitioning	1.55522	0.00279103	1.05572	0.285048	Cell division, chromosome partitioning
cg2159		hypothetical protein	2.81928	0.0388792	0.947317	0.226324	Unknown function
cg2160		putative hydrolase of metallo-β-lactamase superfamily	0.983352	0.469297	1.04855	0.186422	General function prediction only
cg2161	dapA	dihydrodipicolinate synthase (EC:4.2.1.52)	2.08536	0.177087	0.899471	0.0447829	Amino acid transport and metabolism
cg2162	thyX	alternative thymidylate synthase (EC:2.1.1.148)	0.684706	0.0223596	1.06982	0.0788355	Nucleotide transport and metabolism
cg2163	dapB	dihydrodipicolinate reductase (EC:1.3.1.26)	0.63553	0.0312002	0.985792	0.475255	Amino acid transport and metabolism
cg2165		putative secreted protein	0.411593	0.0155701	1.07682	0.214771	Unknown function
cg2166	gpsI	polyribonucleotide nucleotidyltransferase (EC:2.7.7.8)	0.712965	0.0619793	1.06172	0.202571	Nucleotide transport and metabolism
cg2167	rpsO	30S ribosomal protein S15	1.02274	0.267811	0.894872	0.263098	Translation, ribosomal structure and biogenesis
cg2168	iunH2	nucleoside hydrolase,inosine-uridine preferring (EC:3.2.2.1)	3.17924	0.223595	1.06827	0.265371	Nucleotide transport and metabolism
cg2169	ribF	putative kinase / FMN adenylyltransferase (EC:2.7.1.26), maybe involved riboflavin metabolism, riboflavin	0.873052	0.215229	0.88908	0.0953593	Coenzyme transport and metabolism
cg2170	truB	tRNA pseudouridine synthase B	0.977919	0.479094	1.06352	0.156846	Translation, ribosomal structure and biogenesis
cg2171	pptA	phosphopantetheinyl transferase, iron-chelating complex subunit	0.611144	0.124876	1.06591	0.17591	Coenzyme transport and metabolism
cg2172		putative serine/threonine-specific protein phosphatase	1.52233	0.10503	1.14574	0.00890259	General function prediction only
cg2173	dinF	putative DNA-damage-inducible membrane protein, putative MATE multidrug efflux protein, multidrug/oligosaccharidyl-lipid/polysaccharide MOP flippase	0.341758	0.189476	1.06209	0.273992	General function prediction only
cg2174		putative exopolyphosphatase-related protein	1.2761	0.101199	0.995094	0.469018	Inorganic ion transport and metabolism
cg2175	rbfA	ribosome-binding factor A	2.66868	0.182704	0.945984	0.319223	Translation, ribosomal structure and biogenesis
cg2176	infB	translation initiation factor IF-2 GTPase	0.779229	0.345961	1.02913	0.32082	Translation, ribosomal structure and biogenesis
cg2177		putative nucleic-acid-binding protein implicated in transcription termination	0.60449	0.0669127	1.07927	0.17269	Transcription including sigma factors, RNA processing and modification
cg2178	nusA	transcription elongation factor NusA	0.899586	0.0868188	1.01501	0.316547	Transcription including sigma factors, RNA processing and modification
cg2179		hypothetical protein, conserved	0.641778	0.0872399	1.01336	0.397523	Unknown function
cg2180		putative secreted protein	2.18317	0.0419583	0.80174	0.0120384	Unknown function
cg2181	oppA	ABC-type peptide transport system, secreted component	1.66335	0.298556	0.5368	0.0173549	Transport and metabolism of further metabolites
cg2182	oppB	ABC-type peptide transport system, permease component	0.525611	0.039325	0.524107	0.00904049	Transport and metabolism of further metabolites
cg2183	oppC	ABC-type peptide transport system, permease component	0.259752	0.00320446	0.597964	0.00796931	Transport and metabolism of further metabolites
cg2184	oppD	ATPase component of peptide ABC-type transport system, contains duplicated ATPase domains	0.141438	0.140651	0.637946	0.0382216	Transport and metabolism of further metabolites
cg2185	proS	prolyl-tRNA synthetase (EC:6.1.1.15)	1.19033	0.285791	0.954444	0.38933	Translation, ribosomal structure and biogenesis
cg2186		hypothetical protein, conserved	0.841024	0.214747	0.79718	0.163104	Unknown function
cg2187		putative Mg-chelatase subunit D	1.08563	0.296272	1.10239	0.0731619	Inorganic ion transport and metabolism
cg2188		putative Mg-chelatase subunit I	1.08969	0.0755382	1.10726	0.0439155	Inorganic ion transport and metabolism
cg2189	cobA (cysG)	uroporphyrinogen III synthase/methyltransferase, loss causes cysteine auxotrophy	0.825931	0.2768	0.838106	0.103824	Transport and metabolism of further metabolites
cg2190		hypothetical protein, conserved	1.32669	0.0252962	1.01731	0.399635	Unknown function
cg2191		hypothetical protein, conserved	0.98802	0.460549	1.15435	0.0249513	Unknown function
cg2192	mqo	malate:quinone oxidoreductase (EC:1.1.99.16)	1.13162	0.138524	0.989962	0.480855	Central carbon metabolism; Respiration and oxidative phosphorylation
cg2193		putative lysophospholipase	0.604383	0.0253952	1.09019	0.113279	Cell wall/membrane/envelope biogenesis
cg2194	mtr (gor)	mycothione reductase	0.958512	0.455563	1.04287	0.0500065	Transport and metabolism of further metabolites
cg2195		putative secreted or membrane protein	0.652842	0.207519	1.27111	0.068393	Unknown function
cg2196		putative secreted or membrane protein	0.866504	0.419886	1.39815	0.0161296	Unknown function
cg2197		putative membrane protein	0.841707	0.0508862	1.05219	0.379309	Unknown function
cg2198	map2	methionine aminopeptidase (EC:3.4.11.18)	1.56408	0.0111837	0.892162	0.188213	Protein turnover and chaperones
cg2199	pbp2a	penicillin-binding protein, putative D-alanyl-D-alanine carboxypeptidase (EC:3.4.16.4)	0.779563	0.154749	0.894726	0.108251	Cell wall/membrane/envelope biogenesis
cg2200	chrA (cgtR8)	two component response regulator, control of heme homeostasis/export	2.73367	0.0319219	0.935729	0.129442	Signal transduction mechanisms
cg2201	chrS (cgtS8)	two component sensor kinase, control of heme homeostasis/export	3.28106	0.0248893	0.98207	0.47955	Post-translational modification; Signal transduction mechanisms
cg2202	hrtB	ABC-type heme transport system, permease component	0.508534	0.0169246	0.974525	0.460019	Transport and metabolism of further metabolites
cg2204	hrtA	ABC-type heme transport system, ATPase component	0.548362	0.0366638	1.20698	0.0770146	Transport and metabolism of further metabolites
cg2206	ispG	4-hydroxy-3-methylbut-2-en-1-yl diphosphate synthase (EC:1.17.7.1)	2.35542	0.131822	0.952259	0.293349	Transport and metabolism of further metabolites
cg2207		putative membrane-embedded Zn-dependent protease	2.05967	0.142691	1.03086	0.304909	General function prediction only
cg2208	dxr	1-deoxy-D-xylulose 5-phosphate reductoisomerase (EC:1.1.1.267)	1.13409	0.114436	1.29292	0.0747076	Transport and metabolism of further metabolites
cg2211		putative membrane protein	0.782926	0.0840968	0.937201	0.206328	Unknown function
cg2212		putative ABC-type multidrug transport system, permease component	1.49655	0.0395952	1.11609	0.32439	General function prediction only
cg2213		putative ABC-type multidrug transport system, ATPase component	1.68057	0.0716524	0.979164	0.481083	General function prediction only
cg2214		putative Fe-S-cluster redox enzyme	3.91234	0.113921	1.06528	0.153348	General function prediction only
cg2215		putative membrane protein	1.31631	0.23199	1.10015	0.232752	General function prediction only
cg2216	cdsA	phosphatidate cytidylyltransferase (EC:2.7.7.41)	0.720915	0.196488	1.21461	0.0438466	Cell wall/membrane/envelope biogenesis
cg2217	frr	ribosome releasing factor	0.792434	0.223507	1.25207	0.0292687	Translation, ribosomal structure and biogenesis
cg2218	pyrH	uridylate kinase	0.898236	0.357663	1.19132	0.066871	Nucleotide transport and metabolism
cg2221	tsf	elongation factor Ts	0.923613	0.334466	1.1678	0.141658	Translation, ribosomal structure and biogenesis
cg2222	rpsB	30S ribosomal protein S2	0.571773	0.0616008	1.13947	0.177389	Translation, ribosomal structure and biogenesis
cg2223		putative secreted or membrane protein related to metalloendopeptidase	0.686004	0.0865327	1.0042	0.418422	General function prediction only
cg2224	xerC	tyrosine recombinase	1.79849	0.149012	1.29267	0.0415371	DNA replication, recombination, repair, and degradation
cg2229		putative excinuclease ATPase subunit or CTP synthase UTP-ammonia lyase	1.1762	0.195195	0.85245	0.033328	General function prediction only
cg2230	rnhB	ribonuclease HII (EC:3.1.26.4)	1.75944	0.0570561	0.851447	0.0622186	Transcription including sigma factors, RNA processing and modification
cg2232	lepB	putative signal peptidase I spase I (EC:3.4.21.89)	1.15283	0.123379	0.930176	0.207359	Protein secretion
cg2234		putative ABC-type putative ironIII dicitrate transporter, substrate-binding lipoprotein	0.884776	0.311472	0.809117	0.182225	Carbon source transport and metabolism; Inorganic ion transport and metabolism
cg2235	rplS	50S ribosomal protein L19	0.520268	0.0377594	0.965968	0.467239	Translation, ribosomal structure and biogenesis
cg2236	thiE	thiamine-phosphate pyrophosphorylase (EC:2.5.1.3)	2.71036	0.0879918	1.10757	0.0635172	Coenzyme transport and metabolism
cg2237	thiO	putative D-amino acid oxidase flavoprotein oxidoreductase (EC:1.4.3.3)	2.01484	0.0437427	1.1497	0.0373224	Coenzyme transport and metabolism
cg2238	thiS	sulfur transfer protein involved in thiamine biosynthesis	1.23057	0.127644	1.10852	0.00368944	Coenzyme transport and metabolism
cg2239	thiG	thiazole synthase, involved in thiamine biosynthesis	2.81495	0.0980285	1.13986	0.00942285	Coenzyme transport and metabolism
cg2240	thiF	molybdopterin biosynthesis protein MoeB, involved in thiamine biosynthesis	1.57354	0.0836025	1.11433	0.123529	Coenzyme transport and metabolism
cg2241	tex	transcriptional accessory protein, RNA binding	1.32198	0.0269751	1.13026	0.0149936	Transcription including sigma factors, RNA processing and modification
cg2242		putative transcription regulation repressor, LacI-family, struture is known: pdb 3JVD	1.08099	0.401196	1.07253	0.350116	Signal transduction mechanisms
cg2244	pcaB2	putative 3-carboxy-cis,cis-muconate cycloisomerase, or Lyase class I-family	/	/	1.5774		Carbon source transport and metabolism; Inorganic ion transport and metabolism
cg2247		hypothetical protein	1.08084	0.325507	1.10896	0.0600055	Unknown function
cg2248		putative membrane protein, DedA-family	1.39928	0.0220245	1.09462	0.0580749	Unknown function
cg2249	trmD	tRNA guanine-N1--methyltransferase (EC:2.1.1.31)	0.605003	0.10614	0.893673	0.272289	Translation, ribosomal structure and biogenesis
cg2250		putative secreted lipoprotein	2.94808	0.0390523	1.16186	0.110652	Unknown function
cg2251	rimM	16S rRNA-processing protein	0.620677	0.0251162	0.974438	0.456992	Translation, ribosomal structure and biogenesis
cg2252		putative double-stranded β-helix domain	1.05712	0.328342	0.904038	0.221887	Unknown function
cg2253	rpsP	30S ribosomal protein S16	0.46471	0.00699062	1.04242	0.120633	Translation, ribosomal structure and biogenesis
cg2254		putative ankyrin repeat protein	0.728371	0.188749	0.849244	0.0143379	Unknown function
cg2255		putative ABC-type multidrug/daunorubicin transport system, permease component	/	/	1.0406	0.432184	General function prediction only
cg2256		putative ABC-type multidrug/daunorubicin transport system, ATPase component	0.200629	0.0621005	0.932133	0.249632	General function prediction only
cg2257	srp	signal recognition particle GTPase	1.31379	0.194326	0.761854	0.0628846	Translation, ribosomal structure and biogenesis
cg2258	glnD	PII uridylyl-transferase (EC:2.7.7.59)	0.535321	0.0238464	0.936347	0.0912889	Signal transduction mechanisms
cg2260	glnK	nitrogen transcriptional regulator PII	1.39544	0.223989	0.985172	0.494604	Signal transduction mechanisms
cg2261	amtB	low affinity ammonium uptake protein	1.86576	0.0208563	1.09359	0.199466	Inorganic ion transport and metabolism
cg2262	ftsY	signal recognition particle GTPase	0.607102	0.135035	1.24406	0.0904353	Translation, ribosomal structure and biogenesis
cg2263		hypothetical protein	0.138958	0.00408285	1.09765	0.192083	Unknown function
cg2265	smc	chromosome segregation ATPase	0.814854	0.0228502	1.07566	0.13939	Cell division, chromosome partitioning
cg2266		putative acylphosphatase (EC:3.6.1.7)	1.96361	0.0702615	1.28062	0.00130982	General function prediction only
cg2267		putative membrane protein	1.75746	0.0745782	1.33256	0.00102394	Unknown function
cg2268		putative transcriptional regulator, LysR-family	1.78599	0.0592091	1.041	0.288025	Signal transduction mechanisms
cg2269		putative permease	1.23414		1.10226	0.125773	General function prediction only
cg2270		hypothetical protein, conserved	/	/	1.15		Unknown function
cg2271		putative secondary Co2+/Zn2+/Cd2+ efflux transporter, cation diffusion facilitator CDF-family	0.732083	0.124474	0.856764	0.262488	Inorganic ion transport and metabolism
cg2272	mutM1	formamidopyrimidine-DNA glycosylase (EC:3.2.2.23)	0.707236	0.178231	0.921322	0.0825231	DNA replication, recombination, repair, and degradation
cg2273	rncS (rnc)	ribonuclease III (EC:3.1.26.3)	1.74398	0.0657715	1.0415	0.236668	Transcription including sigma factors, RNA processing and modification
cg2274		putative metal-binding, possibly nucleic acid-binding protein	1.12585	0.0927432	1.13012	0.0655437	General function prediction only
cg2275		putative cell division initiation protein, some homology to F0F1-type ATP synthase b subunit	1.0806	0.352804	0.906067	0.0293016	Cell division, chromosome partitioning
cg2277		putative ABC-type multidrug/protein/lipid transport system, transmembrane ATPase component	4.42319	0.00262479	1.03758	0.0364417	General function prediction only
cg2279		putative ABC-type multidrug/protein/lipid transport system, transmembrane ATPase component	2.04674	0.063661	0.931903	0.384652	General function prediction only
cg2280	gdh	glutamate dehydrogenase, NADP-specific (EC:1.4.1.4)	0.630714	0.0546378	1.072	0.345309	Amino acid transport and metabolism
cg2282	glxK	glycerate kinase (EC:2.7.1.31)	0.729868	0.164192	1.09787	0.0658647	Amino acid transport and metabolism; Lipid transport and metabolism
cg2283		hypothetical protein	1.63016	0.189459	1.03987	0.411324	Unknown function
cg2284	galT	galactose-1-phosphate uridylyltransferase (EC:2.7.7.12)	0.672024	0.0868473	1.12259	0.018305	Carbon source transport and metabolism
cg2285	hipO	putative hippurate hydrolase protein	0.958018	0.457785	0.919558	0.281208	Amino acid transport and metabolism
cg2286		putative membrane protein, carbohydrate phosphorylase	/	/	0.861872	0.188691	General function prediction only
cg2287		putative membrane protein	0.916678	0.161767	0.981236	0.483357	Unknown function
cg2289	glgP	α-glucan phosphorylase, glycogen phosphorylase (EC:2.4.1.1), probably essential	1.98973	0.0060506	1.10342	0.198129	Carbon source transport and metabolism
cg2290		putative glyoxalase/bleomycin resistance/dioxygenase superfamily protein	2.13506	0.0253576	1.21204	0.00799759	General function prediction only
cg2291	pyk	pyruvate kinase (EC:2.7.1.40)	0.464001	0.00700963	1.40153	0.0639625	Central carbon metabolism
cg2292	lgt	prolipoprotein diacylglyceryl transferase (EC:2.4.99.-)	3.14082	0.0488596	0.962999	0.444779	Cell wall/membrane/envelope biogenesis
cg2293		putative indole-3-glycerol phosphate synthase, essential	0.571319	0.097099	1.01999	0.256994	Amino acid transport and metabolism
cg2294		putative membrane protein	0.732161	0.04238	1.14968	0.011099	Unknown function
cg2296	hisI	phosphoribosyl-AMP cyclohydrolase (EC:3.5.4.19)	0.924173	0.441088	1.14776	0.107586	Amino acid transport and metabolism
cg2297	hisF	imidazole glycerol phosphate synthase subunit HisF (EC:4.1.3.-)	0.792632	0.0277048	1.10686	0.0604641	Amino acid transport and metabolism
cg2298	impA	myo-inositol-1or 4-monophosphatase-family protein (EC:3.1.3.25)	0.759545	0.27425	1.10772	0.0769162	Cell wall/membrane/envelope biogenesis
cg2299	hisA	1-5-phosphoribosyl-5-[5-phosphoribosylaminomethylideneamino] imidazole-4-carboxamide isomerase (EC:5.3.1.16)	0.613917	0.0553304	1.01685	0.369896	Amino acid transport and metabolism
cg2300	hisH	imidazole glycerol phosphate synthase subunit HisH (EC:2.4.2.-)	0.499505	0.015475	0.918366	0.0142926	Amino acid transport and metabolism
cg2301		putative permease of the major facilitator superfamily	1.56571	0.132511	0.997451	0.454836	General function prediction only
cg2302		putative membrane protein	0.461272	0.00574895	1.20072	0.0109135	Unknown function
cg2303	hisB	imidazoleglycerol-phosphate dehydratase (EC:4.2.1.19)	0.159857	0.00877549	1.06343	0.0923771	Amino acid transport and metabolism
cg2304	hisC	histidinol-phosphate aminotransferase (EC:2.6.1.9), loss causes histidine auxotrophy	0.16186	0.0843873	1.0992	0.122274	Amino acid transport and metabolism
cg2305	hisD	histidinol dehydrogenase (EC:1.1.1.23)	0.0606906	0.00037603	0.910808	0.182306	Amino acid transport and metabolism
cg2306		hypothetical protein, conserved	0.408617	0.00453806	0.800353	0.026348	Unknown function
cg2307		putative membrane protein	0.605957	0.0523873	1.04665	0.337906	Unknown function
[truncated: 1,042 more rows]
